# Supplementary material for: Food waste valorization to green energy vehicles: sustainability assessment
Source: Royal Society of Chemistry journal article supplement (doi:10.1039/d1ee00850a), 2021-01-01
Supplement: d1ee00850a1.pdf [file d1ee00850a1.pdf]

## **Supplementary Information**

### **Food Waste Valorization to Green Energy Vehicles: Sustainability Assessment**

Jaewon Byun, Oseok Kwon, Hoyoung Park, and Jeehoon Han\*

---

\* Corresponding author: Tel.: +82 63 270 4039; fax: +82 63 270 2306. E-mail address: [jhhan@jbnu.ac.kr](mailto:jhhan@jbnu.ac.kr)

## S.1 Forecast analysis

**Table S1. The FW carbon footprint (FWCF) by country in 2030**

Unit: million t of CO<sub>2</sub> / year

| Country                | FWCF | Country                  | FWCF | Country                          | FWCF |
|------------------------|------|--------------------------|------|----------------------------------|------|
| Albania                | 5    | Japan                    | 69   | Tunisia                          | 31   |
| Armenia                | 5    | Republic of Korea        | 300  | Turkey                           | 104  |
| Austria                | 9    | Angola                   | 32   | Turkmenistan                     | 13   |
| Azerbaijan             | 10   | Benin                    | 11   | United Arab Emirates             | 23   |
| Belarus                | 11   | Botswana                 | 1    | Uzbekistan                       | 44   |
| Belgium                | 14   | Burkina Faso             | 12   | Yemen                            | 10   |
| Bosnia and Herzegovina | 3    | Cabo Verde               | 7    | Afghanistan                      | 13   |
| Bulgaria               | 5    | Cameroon                 | 19   | Bangladesh                       | 65   |
| Croatia                | 4    | Central African Republic | 3    | Brunei Darussalam                | 1    |
| Cyprus                 | 1    | Chad                     | 6    | Cambodia                         | 89   |
| Czechia                | 7    | Congo                    | 4    | India                            | 691  |
| Denmark                | 9    | Cote d'Ivoire            | 17   | Indonesia                        | 173  |
| Estonia                | 1    | Djibouti                 | 1    | Iran (Islamic Republic of)       | 95   |
| Finland                | 6    | Ethiopia                 | 51   | Lao People's Democratic Republic | 8    |
| France                 | 77   | Gabon                    | 1    | Malaysia                         | 29   |
| Georgia                | 3    | Gambia                   | 6    | Maldives                         | 2    |
| Germany                | 80   | Ghana                    | 37   | Myanmar                          | 71   |
| Greece                 | 18   | Guinea                   | 7    | Nepal                            | 29   |
| Hungary                | 9    | Guinea-Bissau            | 4    | Pakistan                         | 140  |
| Iceland                | 1    | Kenya                    | 34   | Philippines                      | 81   |
| Ireland                | 6    | Lesotho                  | 1    | Sri Lanka                        | 16   |
| Italy                  | 73   | Liberia                  | 2    | Thailand                         | 66   |
| Latvia                 | 2    | Madagascar               | 13   | Timor-Leste                      | 7    |
| Lithuania              | 3    | Malawi                   | 25   | Viet Nam                         | 90   |
| Luxembourg             | 0    | Mali                     | 15   | Antigua and Barbuda              | 8    |
| Malta                  | 0    | Mauritania               | 2    | Argentina                        | 161  |
| Montenegro             | 1    | Mauritius                | 2    | Bahamas                          | 0    |
| Netherlands            | 26   | Mozambique               | 18   | Barbados                         | 1    |

|                                                 |       |                                          |     |                                          |     |
|-------------------------------------------------|-------|------------------------------------------|-----|------------------------------------------|-----|
| Norway                                          | 8     | Namibia                                  | 3   | Belize                                   | 2   |
| Poland                                          | 37    | Niger                                    | 25  | Bermuda                                  | 1   |
| Portugal                                        | 15    | Nigeria                                  | 182 | Bolivia<br>(Plurinational State<br>of)   | 84  |
| Republic of Moldova                             | 2     | Rwanda                                   | 11  | Brazil                                   | 423 |
| Romania                                         | 24    | Sao Tome and<br>Principe                 | 0   | Chile                                    | 32  |
| Russian Federation                              | 107   | Senegal                                  | 7   | Colombia                                 | 40  |
| Serbia                                          | 7     | Sierra Leone                             | 15  | Costa Rica                               | 9   |
| Slovakia                                        | 3     | South Africa                             | 50  | Cuba                                     | 10  |
| Slovenia                                        | 2     | Sudan (former)                           | 40  | Dominica                                 | 3   |
| Spain                                           | 75    | Swaziland                                | 1   | Dominican Republic                       | 17  |
| Sweden                                          | 9     | Togo                                     | 9   | Ecuador                                  | 14  |
| Switzerland                                     | 6     | Uganda                                   | 26  | El Salvador                              | 4   |
| The former Yugoslav<br>Republic of<br>Macedonia | 2     | United Republic of<br>Tanzania           | 32  | Grenada                                  | 5   |
| Ukraine                                         | 44    | Zambia                                   | 8   | Guatemala                                | 11  |
| United Kingdom                                  | 54    | Zimbabwe                                 | 10  | Guyana                                   | 2   |
| Australia                                       | 31    | Algeria                                  | 42  | Haiti                                    | 4   |
| Canada                                          | 52    | Democratic People's<br>Republic of Korea | 28  | Honduras                                 | 6   |
| Fiji                                            | 0     | Egypt                                    | 97  | Jamaica                                  | 27  |
| French Polynesia                                | 0     | Iraq                                     | 19  | Mexico                                   | 132 |
| Kiribati                                        | 0     | Israel                                   | 13  | Nicaragua                                | 4   |
| New Caledonia                                   | 0     | Jordan                                   | 8   | Panama                                   | 4   |
| New Zealand                                     | 10    | Kazakhstan                               | 28  | Paraguay                                 | 32  |
| Samoa                                           | 0     | Kuwait                                   | 6   | /u                                       | 23  |
| Solomon Islands                                 | 0     | Kyrgyzstan                               | 7   | Saint Kitts and Nevis                    | 0   |
| United States of<br>America                     | 380   | Lebanon                                  | 4   | Saint Lucia                              | 0   |
| Vanuatu                                         | 0     | Mongolia                                 | 7   | Saint Vincent and the<br>Grenadines      | 0   |
| China, Hong Kong<br>SAR                         | 7     | Morocco                                  | 40  | Suriname                                 | 0   |
| China, Macao SAR                                | 79    | Oman                                     | 7   | Trinidad and Tobago                      | 1   |
| China, mainland                                 | 2,272 | Saudi Arabia                             | 37  | Uruguay                                  | 8   |
| China, Taiwan<br>Province of                    | 21    | Tajikistan                               | 9   | Venezuela<br>(Bolivarian Republic<br>of) | 103 |

**Table S2. The light-duty vehicles carbon footprint (LCF) by country in 2030<sup>1</sup>**

Unit: million t of CO<sub>2</sub> / year

| Country                | LCF | Country    | LCF | Country               | LCF |
|------------------------|-----|------------|-----|-----------------------|-----|
| Afghanistan            | 1   | Finland    | 6   | Mozambique            | 4   |
| Albania                | 3   | France     | 65  | Myanmar               | 8   |
| Algeria                | 43  | Gabon      | 2   | Namibia               | 2   |
| Argentina              | 37  | Gambia     | 0   | Nepal                 | 3   |
| Armenia                | 2   | Georgia    | 3   | Netherlands           | 18  |
| Australia              | 59  | Germany    | 95  | New Zealand           | 9   |
| Austria                | 12  | Ghana      | 11  | Niger                 | 3   |
| Azerbaijan             | 6   | Greece     | 13  | Norway                | 14  |
| Bangladesh             | 13  | Grenada    | 0   | Oman                  | 11  |
| Barbados               | 0   | Guatemala  | 6   | Paraguay              | 4   |
| Belarus                | 10  | Guinea     | 2   | Peru                  | 24  |
| Belgium                | 12  | Guyana     | 1   | Philippines           | 39  |
| Benin                  | 4   | Haiti      | 1   | Poland                | 30  |
| Bhutan                 | 0   | Honduras   | 3   | Portugal              | 11  |
| Bosnia and Herzegovina | 3   | Hungary    | 9   | Republic of Korea     | 68  |
| Botswana               | 3   | Iceland    | 1   | Republic of Macedonia | 1   |
| Brazil                 | 136 | India      | 407 | Republic of Moldova   | 1   |
| Bulgaria               | 7   | Indonesia  | 134 | Republic of Serbia    | 7   |
| Burkina Faso           | 4   | Ireland    | 8   | Romania               | 11  |
| Burundi                | 1   | Israel     | 12  | Russia                | 125 |
| Cabo Verde             | 0   | Italy      | 58  | Senegal               | 3   |
| Cambodia               | 5   | Japan      | 105 | Seychelles            | 0   |
| Cameroon               | 3   | Jordan     | 7   | Singapore             | 5   |
| Canada                 | 129 | Kazakhstan | 12  | Slovakia              | 5   |
| Central African region | 1   | Kenya      | 10  | Slovenia              | 3   |
| Chad                   | 4   | Kiribati   | 0   | South Africa          | 58  |
| Chile                  | 31  | Kyrgyzstan | 3   | Spain                 | 65  |
| China                  | 770 | Laos       | 3   | Sri Lanka             | 6   |
| Colombia               | 24  | Latvia     | 2   | Sweden                | 11  |
| Comoros                | 0   | Lebanon    | 4   | Switzerland           | 7   |
| Congo                  | 3   | Lesotho    | 1   | Tajikistan            | 1   |

|                    |    |                  |     |                             |     |
|--------------------|----|------------------|-----|-----------------------------|-----|
| Costa Rica         | 3  | Liberia          | 1   | Thailand                    | 54  |
| Côte d'Ivoire      | 3  | Liechtenstein    | 0   | Togo                        | 2   |
| Croatia            | 3  | Lithuania        | 4   | Trinidad and Tobago         | 3   |
| Cyprus             | 2  | Luxembourg       | 4   | Tunisia                     | 13  |
| Czech republic     | 10 | Madagascar       | 3   | Turkey                      | 66  |
| D.R.Congo          | 3  | Maldives         | 1   | Uganda                      | 8   |
| Denmark            | 7  | Malta            | 1   | Ukraine                     | 33  |
| Djibouti           | 1  | Marshall Islands | 0   | United Kingdom              | 73  |
| Dominica           | 0  | Mauritania       | 2   | United Republic of Tanzania | 9   |
| Dominican Republic | 6  | Mauritius        | 1   | Uruguay                     | 3   |
| Ecuador            | 16 | Mexico           | 147 | US                          | 780 |
| Equatorial Guinea  | 1  | Monaco           | 0   | Vanuatu                     | 0   |
| Eritrea            | 1  | Mongolia         | 3   | Vietnam                     | 48  |
| Estonia            | 2  | Montenegro       | 1   | Zambia                      | 2   |
| Ethiopia           | 13 | Morocco          | 19  | Zimbabwe                    | 2   |

**Table S3. Composition of FW by country**

| Types  | Unit: wt% |         |       |              |
|--------|-----------|---------|-------|--------------|
|        | Water     | Protein | Lipid | Carbohydrate |
| China  | 65.1      | 7.3     | 3.2   | 24.4         |
| India  | 56.9      | 7.4     | 3.7   | 32.0         |
| USA    | 48.2      | 11.2    | 4.5   | 36.1         |
| Brazil | 43.9      | 13.5    | 4.4   | 38.2         |

**Table S4. Food waste potential energy (FWPE) by country in 2030**

|      | Unit: EJ |       |      |        |
|------|----------|-------|------|--------|
|      | China    | India | USA  | Brazil |
| FWPE | 7.80     | 3.20  | 1.61 | 1.64   |

## S.2 System-level simulation

### Anaerobic digestion (AD) for methane and hydrogen production

Two process simulation models for the production of methane and hydrogen from FW were developed using SuperPro Designer<sup>2</sup> (Fig. S1 and S2). Large-scale processes were designed based on the kinetic models for AD<sup>3-5</sup> considering chemical inhibitors of each reaction, which assumed  $n^{\text{th}}$  plant processing of 50 t/d of FW. Heat exchangers for heat integration were also designed in the processes. Models were developed by countries (China, India, USA, and Brazil) to compare characteristics of each country. The FW compositions of four countries are shown in Table S3.

#### 1) Methane production from FW

A large-scale methane production process from 50 t/d of FW was designed based on the results for AD reported in the previous studies<sup>3,4</sup> (Fig. S1). The FW stream (50 t/d) was charged to an anaerobic digester maintained at 55 °C. Water was added to maintain a solid mass fraction (including carbohydrates, proteins, and lipids) of 0.93. After 15 d, 0.022–0.037 tons of biogas were produced / t of FW, which consists of 31.1–38.2 wt% of methane and 61.5–68.7 wt% of CO<sub>2</sub>.

#### 2) Hydrogen production from FW

A large-scale process producing hydrogen and methane from 50 t/d of FW was designed based on the results for AD reported in the previous studies<sup>3-5</sup> (Fig. S2). The FW (50 t/d) was fed to a hydrolysis reactor at 55 °C, where 50% of the carbohydrate was converted to a soluble carbohydrate (glucose). Then, the soluble carbohydrate was fed to dark fermenter, where 1 mol of carbohydrate was decomposed to 2 mol of acetic acid, 2 mol of CO<sub>2</sub>, and 4 mol of hydrogen. After the reaction, 60% of soluble carbohydrate was decomposed, and the product stream contained a low concentration (5.6–5.8 wt%) of acetic acid.

## Pressure swing adsorption (PSA)

In this study, two PSA technologies are considered to separate biomethane and hydrogen from CO<sub>2</sub> (Fig. S1 and S5).

### 1) Separation of biomethane from CO<sub>2</sub>.

Grande CA et al.<sup>6</sup> reported the experimental procedure for lab-scale separation of methane from CO<sub>2</sub> by using PSA, and they evaluated the process performance with equilibrium and kinetic based adsorbents. Carbon molecular sieve 3K was employed as the example of a kinetic adsorbent because methane diffusion is extremely small. A five-step cycle configuration (feed, intermediate depressurization, blowdown, purge and pressurization) was employed to compare with results obtained with a four-step cycle without intermediate depressurization. Adsorption equilibrium and kinetic for methane and CO<sub>2</sub> in carbon molecular sieve 3K are obtained by simulation that changed many variables. (column length, cycle time, operating pressure, etc.). The purity and recovery rate according to the change of each step time are obtained based on the kinetic model. The purity of 98% or more of methane is a reasonable assumption that hydrogen sulfide has been removed, so a cycle based on this is determined. (pressurization time = 70 s, feed time = 130 s, depress time = 10 s, blow time = 140 s, feed pressure = 800 kPa, inter pressure = 250 kPa, purity of methane = 98.1%, recovery of *methane* = 79.7%, productivity = 3.83 mol of methane/h/kg)

### 2) Separation of hydrogen from CO<sub>2</sub>.

After AD and SMR, resulting mixtures which consist of binary gas mixture (H<sub>2</sub>-CO<sub>2</sub>) and multicomponent gas mixture (H<sub>2</sub>-CO-CO<sub>2</sub>-CH<sub>4</sub>), respectively. The fuel cell vehicles (FCV) require high purity (99.99%) hydrogen as a fuel. Thus, we eliminate the contaminants, CO, CO<sub>2</sub> and methane from the gas mixtures to obtain the high-purity of hydrogen.

There are some commercial technologies for hydrogen separation, such as Membrane separation, cryogenic distillation, and PSA. Among these technologies, PSA is the most feasible process to satisfy the fuel grade purity of hydrogen in terms of economics.

An adsorption isotherm in a single component is easily measured by experiment. However, to measure the adsorption amount for each component is difficult and has many errors. Also, it takes a lot of time. The adsorption of multicomponent gas mixture is predicted using the adsorption isotherm of pure gas. Binary gas (H<sub>2</sub>-CO<sub>2</sub>) and multicomponent gas (H<sub>2</sub>-CO-CO<sub>2</sub>-CH<sub>4</sub>) mixture have a different behavior in the PSA column. Thus, two different experimental data and isotherm models were chosen according to references in which PSA experiment have been designed to work in conditions similar in feed gas

composition to the one modelled in this research<sup>7,8</sup>. Extended Langmuir Freundlich isotherm and Dual-site Langmuir isotherm are used for binary and multicomponent mixture, respectively.

First, hydrogen separation in binary gas mixture (H<sub>2</sub>-CO<sub>2</sub>)

The Extended Langmuir Freundlich isotherm model is used for predicting the isotherm of binary gas mixture by following loading ratio correlation (LRC) equation (S3) as:

$$q_i = \frac{q_{m_i} B_i P_i^{\frac{1}{n_i}}}{1 + \sum_j^N B_j P_j^{\frac{1}{n_j}}} \quad (S3)$$

Where,

$q_i$  : The adsorption amount of component  $i$ ,

$q_m, B, n$  : Isotherm parameters,

$P$  : The equilibrium pressure.

\* The isotherm parameters are shown in Table S5<sup>9</sup>.

Second, hydrogen separation in multicomponent gas mixture (H<sub>2</sub>-CO-CO<sub>2</sub>-CH<sub>4</sub>)

To design the PSA process, it is necessary to predict exactly the adsorption isotherm of the multicomponent gas mixture. Thus, the equilibrium isotherms are assumed to be described by Dual-Site Langmuir model<sup>7</sup>:

$$q_i = \frac{q_{m_i1} B_{i1} P y_i}{1 + \sum_k B_{k1} P y_k} + \frac{q_{m_i2} B_{i2} P y_i}{1 + \sum_k B_{k2} P y_k} \quad (S4)$$

$$q_{m1} = k_1, B_1 = k_2 \exp \frac{k_3}{T}, q_{m2} = k_4, B_2 = k_5 \exp \frac{k_6}{T}$$

Where,

$q_i$  : The adsorption amount of component  $i$ ,

$P$  : The equilibrium pressure,

$y$  : The mole fraction in gaseous,

$k_1, k_2, k_3, k_4, k_5, k_6$  : Isotherm parameters,

$T$  : The equilibrium temperature.



Dual-Site Langmuir adsorption isotherm parameters for H<sub>2</sub>, CO, CO<sub>2</sub>, CH<sub>4</sub> are shown in Table S6.

The PSA process is designed by the following nine cycle steps: adsorption, first pressure equalization (I), provide purge, second pressure equalization (I), blow down, purge, second pressure equalization (II), first pressure equalization (II), and backfill. The cycle steps, experimental condition, and pressure change data required for PSA process were adopted through the following reference<sup>7</sup>.

### **Acetic acid (AA) extraction and conversion**

#### 1) AA extraction from resulting mixture of AD

The AA is present at low concentrations (5~6 wt%) in the resulting mixture of AD; as such, the efficient design of acetic acid recovery system is important in terms of process feasibility for bioethanol production. Previously, researchers have reported effective liquid–liquid extraction system using organic solvents<sup>10</sup>. Hexane was determined to be the most feasible extraction solvent based on ternary plot of the three-component system. The liquid–liquid extraction system was designed to recover 70% of the AA in the resulting mixture of AD by using ASPEN PLUS Simulators<sup>11</sup> (Fig. S3). A liquid–liquid extraction system using a hexane solvent was designed to recover AA. Here, hexane and the acetic acid solution (10 weight ratio, 30.6 t/d) were fed to a decanter at 35 °C, allowing for a 70% recovery of the acetic acid. After the extraction, 99% of acetic acid was obtained and most of the hexane was recycled to the decanter using two distillation columns. Consequently, 1.712–1.793 t of AA was produced/ton of FW.

#### 2) AA conversion to bioethanol

A large-scale process producing bioethanol from acetic acid was designed based on the esterification of acetic acid and hydrogenolysis of methyl acetate<sup>12, 13</sup>. The process consisted of four main subsystems: (1) esterification, (2) methyl acetate recovery, (3) hydrogenolysis, and (4) bioethanol recovery (Fig. S4).

A mixture of acetic acid and methanol (0.5 volume ratio, 3.5 t/d) was fed to an esterification reactor (R-1) producing methyl acetate in a 97% yield. The reaction mixture was then sent to a distillation column (D-1) to remove 0.4 t/d of water and obtain 3.0 kt/y (55.0 wt.%) of methyl acetate and methanol. The pure hydrogen (2.7 t/d) and methanol (10.0 t/d) excess streams were then charged with the concentrated mixture to a batch reactor (R-2) to generate to a hydrogenolysis reaction stream. The unreacted hydrogen (2.6 t/d) present in the gas phase of the resulting mixture were separated from the liquid phase (S-1) and the bioethanol (0.9 t/d) present in the liquid mixture in addition to S-1 was purified through a distillation column to a high purity (99.0 wt%).



## Steam methane reforming (SMR)

The SMR technology can be used to maximize hydrogen production for FCV operation.

Mozdzierz, et al<sup>14</sup> reported the experimental procedure for lab-scale production of hydrogen from SMR. Kinetics using a nickel-based catalyst with the advantages of high activity and low cost are obtained as follow.

$$R_{st} = \dot{w}_{cat} A_{st} \exp\left(-\frac{E_a}{RT}\right) P_{CH_4}^{0.89} P_{H_2O}^{0.05} \quad (S4)$$

$$A_{st} = 1.354 \times 10^{-3} [\text{mol s}^{-1} \text{g}^{-1} \text{Pa}^{-0.94}]$$

$$E_a = 122500 \text{ J/mol}$$

$$\text{SC (Steam to methane ratio)} = 2.$$

Optimal conditions were selected through the results according to conditions such as temperature and catalyst density. In order to increase the conversion rate, high-temperature conditions were selected, and instead, the density of the catalyst was lowered to prevent temperature changes due to strong endotherm at the reformer inlet. ( $T = 1200 \text{ K} / \dot{w}_{cat} = 2.5 \times 10^5 \text{ g/m}^3$ )

Process simulation models for SMR are developed by using the SuperPro Designer (Fig. S5). Using the selected reaction conditions, residence time of the reactor was 200 seconds. As a result, the conversion rate of methane is 87%, and hydrogen stream of 55 mol% can be obtained. On average, it can produce 2,000 mol/hour hydrogen.

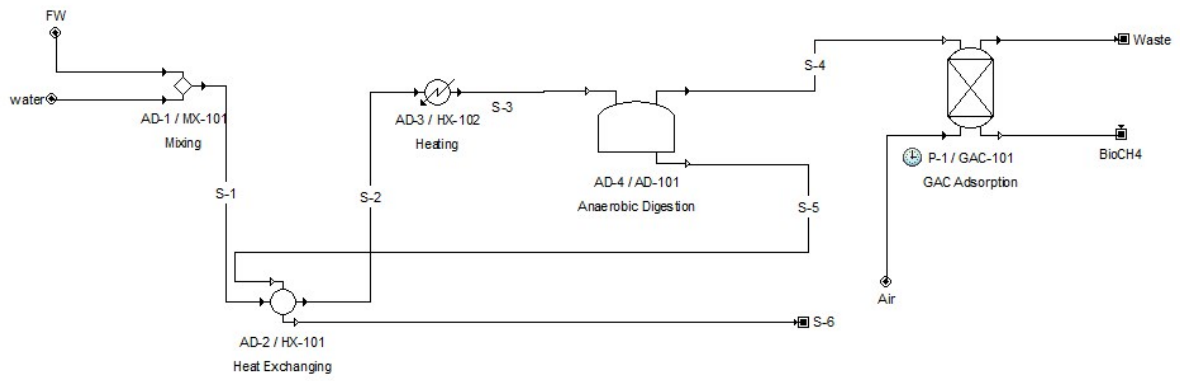

**Fig. S1. Process flow diagram of AD with PSA for biomethane production**

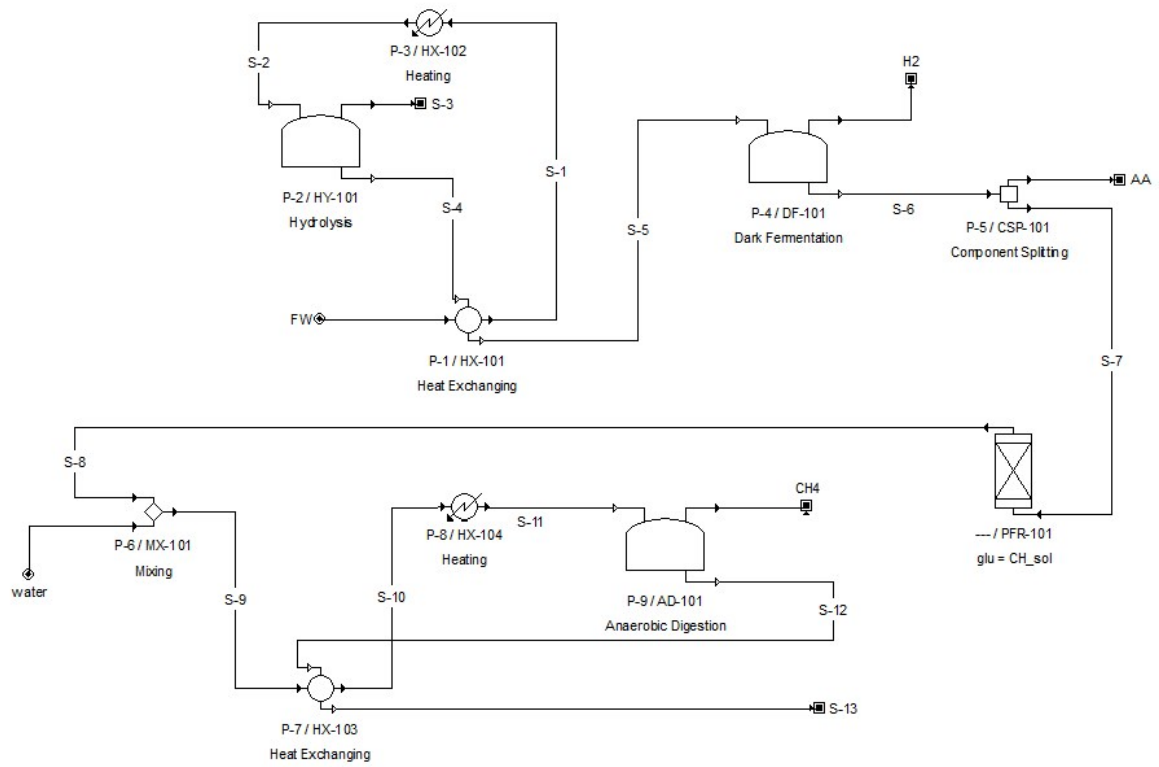

**Fig. S2. Process flow diagram of AD for biohydrogen production**

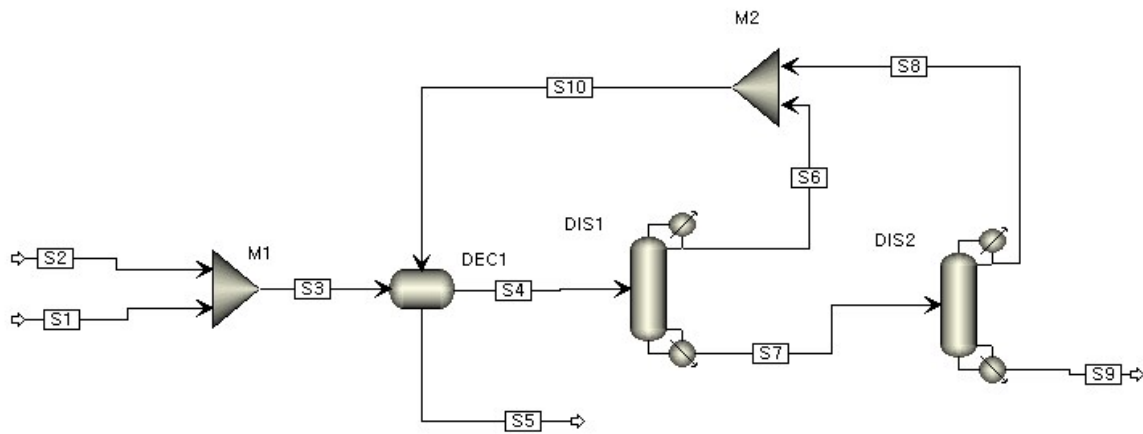

**Fig. S3. Process flow diagram of AA extraction**

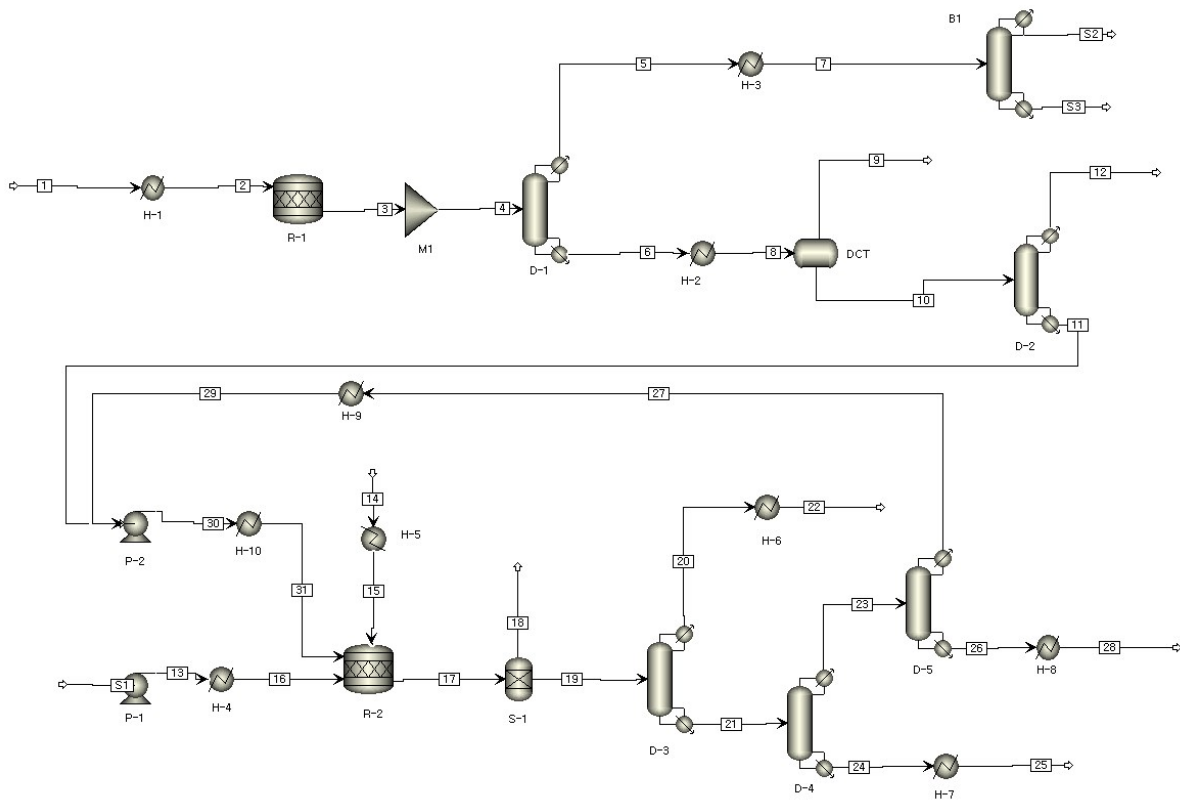

**Fig. S4. Process flow diagram of AA conversion for bioethanol production**

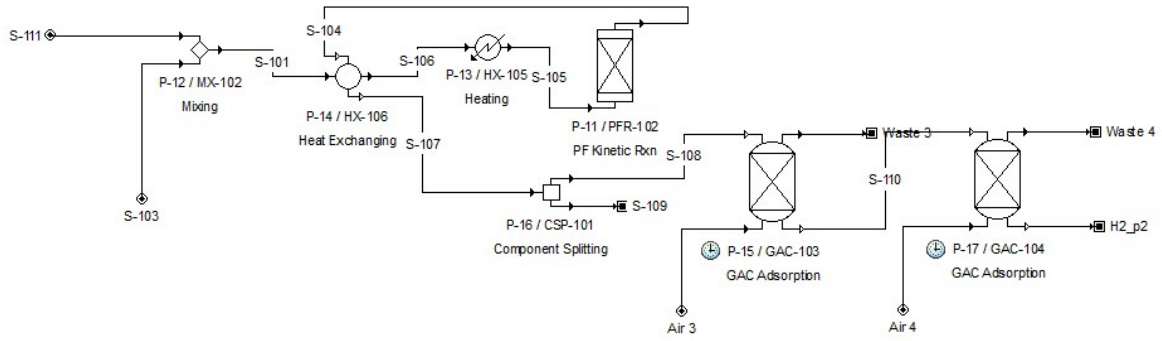

**Fig. S5. Process flow diagram of SMR with PSA for hydrogen production**

**Table S5. Reaction kinetics of AD and DF**

| Conversion steps             | Kinetic equations                                                                                                                              |
|------------------------------|------------------------------------------------------------------------------------------------------------------------------------------------|
| <b>Anaerobic digestion</b>   |                                                                                                                                                |
| Carbohydrate hydrolysis      | $R_S = k S$                                                                                                                                    |
| Protein hydrolysis           | $R_S = k S$                                                                                                                                    |
| Acidogenic glucose degrading | $\mu = \mu_{max}(T) \left( \frac{1}{1 + \frac{K_s}{[(C_6H_{10}O_5)_s]}} \right)$                                                               |
| Lipolytic                    | $\mu = \mu_{max}(T) \left( \frac{1}{1 + \frac{K_s}{[GTO]}} \right)$                                                                            |
| LCFA-degrading               | $\mu = \mu_{max}(T) \left( \frac{1}{1 + \frac{K_{s, LCFA}}{[LCFA]} + \frac{[LCFA]}{K_{i, LCFA}}} \right)$                                      |
| Amino acid-degrading         | $\mu = \mu_{max}(T)$                                                                                                                           |
| Propionate-degrading         | $\mu = \mu_{max}(T) \left( \frac{1}{1 + \frac{K_s}{[C_3H_6O_2]}} \right) \left( \frac{1}{1 + \frac{K_{i, C_2H_4O_2}}{[C_2H_4O_2]}} \right)$    |
| Butyrate-degrading           | $\mu = \mu_{max}(T) \left( \frac{1}{1 + \frac{K_s}{[C_4H_8O_2]}} \right) \left( \frac{1}{1 + \frac{K_{i, C_2H_4O_2}}{[C_2H_4O_2]}} \right)$    |
| Valerate-degrading           | $\mu = \mu_{max}(T) \left( \frac{1}{1 + \frac{K_s}{[C_5H_{10}O_2]}} \right) \left( \frac{1}{1 + \frac{K_{i, C_2H_4O_2}}{[C_2H_4O_2]}} \right)$ |
| Acetoclastic methanogenic    | $\mu = \mu_{max}(T) \left( \frac{1}{1 + \frac{K_s}{[C_2H_4O_2]}} \right) \left( \frac{1}{1 + \frac{[NH_3]}{K_{i, NH_3}}} \right)$              |
| <b>Dark fermentation</b>     |                                                                                                                                                |
| Glucose production           | $R_S = k S$                                                                                                                                    |

Acetic acid production

$$\mu = \mu_{max}(T) \left( \frac{1}{1 + \frac{K_s}{[C_6H_{12}O_6]_s}} \right)$$

---

**Table S6. Pure component parameter for Langmuir – Fledlich model on Zeolite 5A at 303K.**

| Component       | $q_m$ [mmol/g] | B [1/atm] | 1/n     |
|-----------------|----------------|-----------|---------|
| CO <sub>2</sub> | 4.24466        | 7.94235   | 0.95176 |
| CO              | 3.70819        | 0.3397    | 0.6647  |
| H <sub>2</sub>  | 0.44963        | 0.04022   | 1.0817  |

**Table S7. Pure component parameter for Dual-Site Langmuir model on Activated carbon and Zeolite 5A.**

| Component                   |                 | $k_1$<br>[mmol/g] | $k_2$<br>[1/atm] | $k_3$<br>[K] | $k_4$<br>[mmol/g] | $k_5$<br>[1/atm] | $k_6$<br>[K] |
|-----------------------------|-----------------|-------------------|------------------|--------------|-------------------|------------------|--------------|
| <b>Activated<br/>carbon</b> | H <sub>2</sub>  | 0.0191            | 1.90E-05         | 1170         | 8.73E-04          | 4.98E-06         | 1.90E+03     |
|                             | CO              | 0.00423           | 1.43E-05         | 2407.68      | 7.40E-04          | 2.29E-03         | 1760.96      |
|                             | CH <sub>4</sub> | 0.00576           | 7.44E-05         | 2157.02      | 7.09E-04          | 2.73E-02         | 1.47E+03     |
|                             | CO <sub>2</sub> | 0.00764           | 1.28E-04         | 2228.63      | 1.62E-03          | 2.53E-02         | 1724.6       |
| <b>Zeolite 5A</b>           | H <sub>2</sub>  | 0.00064           | 1.14E-04         | 1665.08      | 3.43E-06          | 1.96E-16         | 20848.3      |
|                             | CO              | 0.00231           | 1.17E-04         | 2652.03      | 2.54E-03          | 4.29E-08         | 3755.31      |
|                             | CH <sub>4</sub> | 0.0022            | 2.08E-04         | 2298.51      | 7.31E-04          | 1.98E-12         | 7.28E+03     |
|                             | CO <sub>2</sub> | 0.00356           | 3.01E-03         | 2923.79      | 8.23E-04          | 5.78E-09         | 5478.58      |



### S.3 Energetic analysis

**Table S8. Potential energy production of GV operations using green energy**

| Types          | Unit: kWh/t of FW |       |       |        |
|----------------|-------------------|-------|-------|--------|
|                | China             | India | USA   | Brazil |
| Biomethane     | 102.2             | 131.4 | 142.6 | 142.8  |
| Bioethanol     | 205.1             | 214.7 | 215.0 | 214.6  |
| Biohydrogen    | 133.6             | 145.4 | 154.1 | 153.2  |
| Bioelectricity | 17.6              | 23.0  | 23.1  | 18.7   |

**Table S9. Potential driving distance of GV operations using green energy**

| Types          | Unit: mile/t of FW |       |       |        |
|----------------|--------------------|-------|-------|--------|
|                | China              | India | USA   | Brazil |
| Biomethane     | 77.0               | 99.0  | 107.4 | 107.6  |
| Bioethanol     | 174.1              | 182.2 | 182.5 | 182.1  |
| Biohydrogen    | 220.2              | 239.6 | 254.1 | 252.6  |
| Bioelectricity | 51.3               | 66.9  | 67.4  | 54.5   |

**Table S10. Energy requirements for GV operations**

| Types          |         | Unit: kWh/mile |       |      |        |
|----------------|---------|----------------|-------|------|--------|
|                |         | China          | India | USA  | Brazil |
| Biomethane     | Primary | 1.13           | 1.11  | 1.19 | 1.38   |
|                | Product | 1.33           | 1.33  | 1.33 | 1.33   |
|                | Car     | 0.14           | 0.14  | 0.14 | 0.14   |
| Bioethanol     | Primary | 8.16           | 7.06  | 6.14 | 5.85   |
|                | Product | 1.18           | 1.18  | 1.18 | 1.18   |
|                | Car     | 0.14           | 0.14  | 0.14 | 0.14   |
| Biohydrogen    | Primary | 0.05           | 0.09  | 0.13 | 0.18   |
|                | Product | 0.61           | 0.61  | 0.61 | 0.61   |
|                | Car     | 0.24           | 0.24  | 0.24 | 0.24   |
| Bioelectricity | Primary | 0.74           | 0.72  | 0.82 | 1.14   |
|                | Product | 0.34           | 0.34  | 0.34 | 0.34   |
|                | Car     | 0.24           | 0.24  | 0.24 | 0.24   |

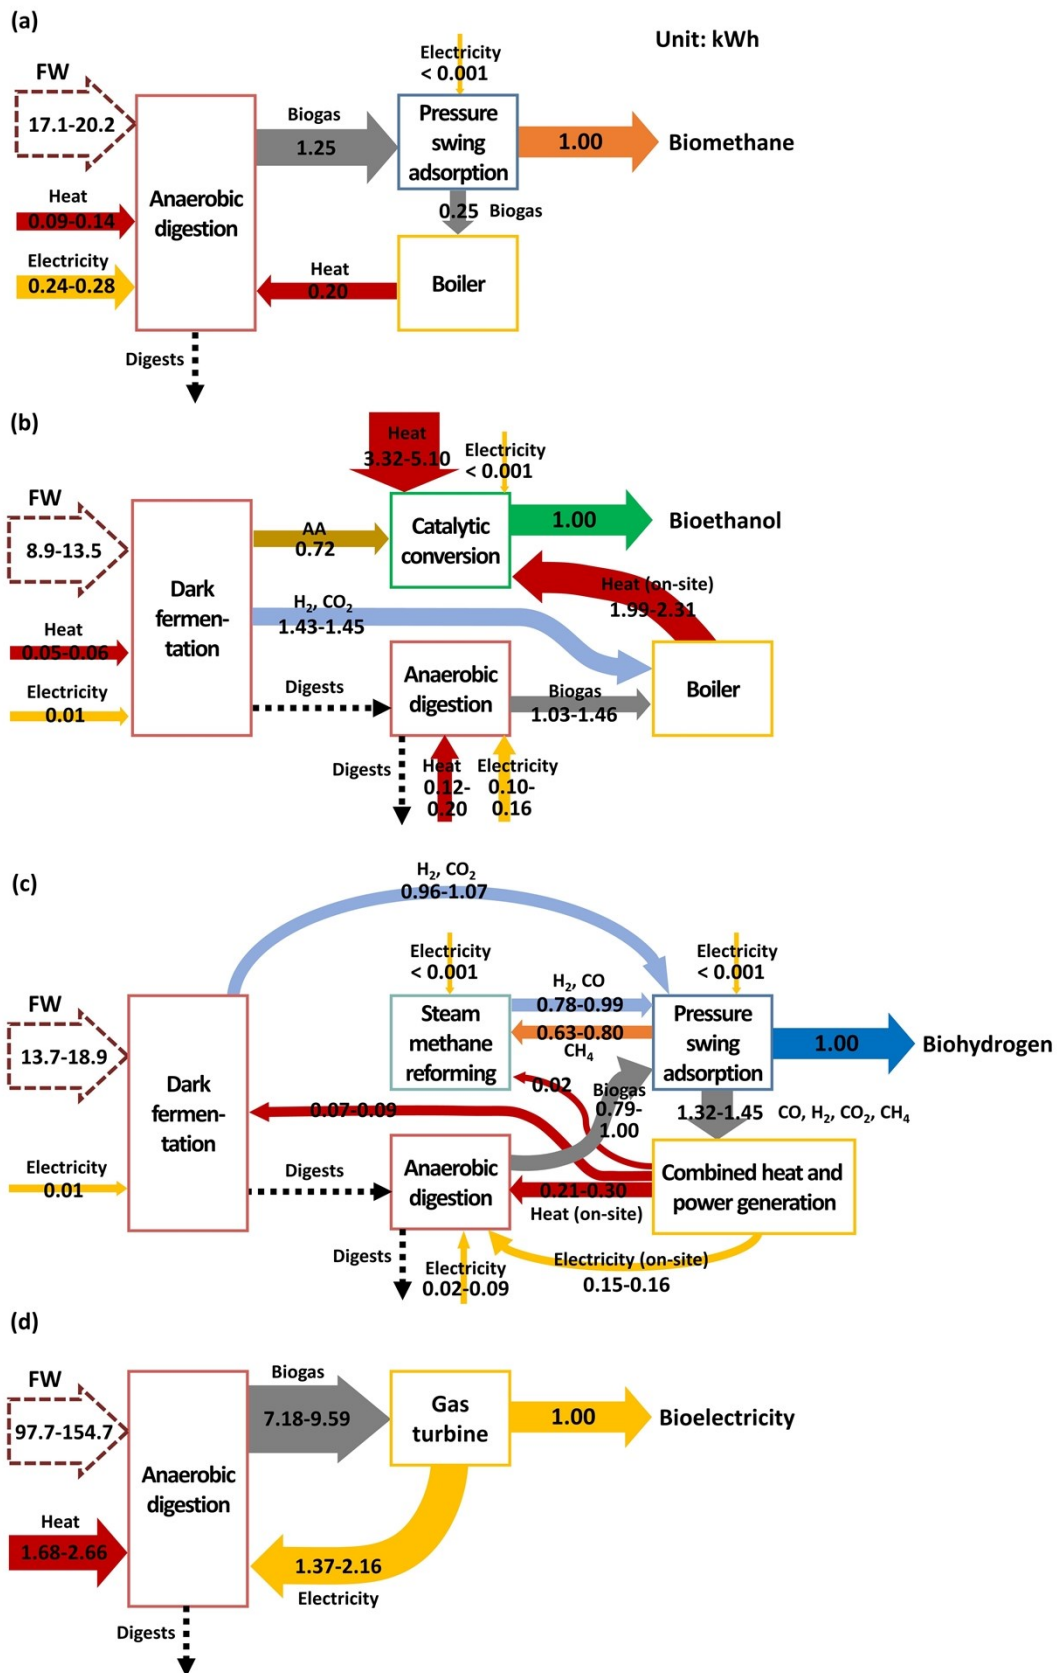

Fig. S6. Sankey diagram of selected pathways for food waste-based green vehicle fuel production. (a) P1 route-biomethane, (b) P2 route-bioethanol, (c) P3 route-biohydrogen, and (d) P4 route-bioelectricity. The boiler and gas turbine efficiency are assumed as 80% and 33%<sup>15</sup>.

## S.4 Economic analysis

**Table S11. Discounted cashflow sheet of biomethane production in China**

| Year                        | -2        | -1         | 0          | 1          | 2           | 3           | 4           | 5           | 6           | 7           | 8           |
|-----------------------------|-----------|------------|------------|------------|-------------|-------------|-------------|-------------|-------------|-------------|-------------|
| Capital Investment          | 3,086,045 | 23,145,341 | 12,344,182 |            |             |             |             |             |             |             |             |
| Land                        | 1,848,000 |            |            |            |             |             |             |             |             |             |             |
| Working Capital             |           |            | 4,821,946  |            |             |             |             |             |             |             |             |
| Loan Payment                |           |            |            | 6,353,085  | 6,353,085   | 6,353,085   | 6,353,085   | 6,353,085   | 6,353,085   | 6,353,085   | 6,353,085   |
| Loan Interest Payment       | 324,035   | 2,754,296  | 4,050,435  | 4,050,435  | 3,889,249   | 3,716,781   | 3,532,239   | 3,334,780   | 3,123,499   | 2,897,428   | 2,655,532   |
| Loan Principal              | 4,629,068 | 39,347,079 | 57,863,352 | 55,560,702 | 53,096,866  | 50,460,561  | 47,639,716  | 44,621,411  | 41,391,824  | 37,936,167  | 34,238,614  |
| Methane                     |           |            |            | 29,739,231 | 33,987,692  | 33,987,692  | 33,987,692  | 33,987,692  | 33,987,692  | 33,987,692  | 33,987,692  |
| Other sales                 |           |            |            | 1,546,439  | 1,767,359   | 1,767,359   | 1,767,359   | 1,767,359   | 1,767,359   | 1,767,359   | 1,767,359   |
| Total Annual Sales          |           |            |            | 31,285,670 | 35,755,051  | 35,755,051  | 35,755,051  | 35,755,051  | 35,755,051  | 35,755,051  | 35,755,051  |
| Annual Manufacturing Cost   |           |            |            | 14,378,425 |             |             |             |             |             |             |             |
| Raw Material cost           |           |            |            | 13,140,625 | 14,016,667  | 14,016,667  | 14,016,667  | 14,016,667  | 14,016,667  | 14,016,667  | 14,016,667  |
| Utility cost                |           |            |            | 1,237,800  | 1,320,320   | 1,320,320   | 1,320,320   | 1,320,320   | 1,320,320   | 1,320,320   | 1,320,320   |
| Baghouse Bags               |           |            |            | 535,125    |             |             |             | 535,125     |             |             |             |
| Fixed Operating Costs       |           |            |            | 7,025,177  | 7,493,523   | 7,493,523   | 7,493,523   | 7,493,523   | 7,493,523   | 7,493,523   | 7,493,523   |
| Total Product Cost          |           |            |            | 21,938,728 | 22,830,510  | 22,830,510  | 22,830,510  | 22,830,510  | 23,365,635  | 22,830,510  | 22,830,510  |
| Annual Depreciation         |           |            |            |            |             |             |             |             |             |             |             |
| <u>General Plant</u>        |           |            |            | 14%        | 24%         | 17%         | 12%         | 9%          | 9%          | 9%          | 4%          |
| Depreciation Charge         |           |            |            | 12,754,125 | 21,857,840  | 15,610,193  | 11,147,588  | 7,970,213   | 7,961,288   | 7,970,213   | 3,980,644   |
| Remaining Value             |           |            |            | 76,497,977 | 54,640,137  | 39,029,944  | 27,882,357  | 19,912,144  | 11,950,857  | 3,980,644   | 0           |
| <u>Heat and Power Plant</u> |           |            |            | 3.75%      | 7.22%       | 6.68%       | 6.18%       | 5.71%       | 5.29%       | 4.89%       | 4.52%       |
| Depreciation Charge         |           |            |            | 269,506    | 518,816     | 479,864     | 443,930     | 410,583     | 379,823     | 351,292     | 324,988     |
| Remaining Value             |           |            |            | 6,917,312  | 6,398,495   | 5,918,632   | 5,474,702   | 5,064,119   | 4,684,296   | 4,333,004   | 4,008,016   |
| Net Revenue                 |           |            |            | -7,727,124 | -13,341,364 | -6,882,295  | -2,199,215  | 1,208,966   | 924,807     | 1,705,610   | 5,963,378   |
| Losses Forward              |           |            |            |            | -7,727,124  | -21,068,488 | -27,950,783 | -30,149,998 | -28,941,032 | -28,016,225 | -26,310,616 |
| Taxable Income              |           |            |            | -7,727,124 | -21,068,488 | -27,950,783 | -30,149,998 | -28,941,032 | -28,016,225 | -26,310,616 | -20,347,237 |
| Income Tax                  |           |            |            | 0          | 0           | 0           | 0           | 0           | 0           | 0           | 0           |
| Annual Cash Flow            |           |            |            | 2,993,857  | 6,571,457   | 6,571,457   | 6,571,457   | 6,571,457   | 6,036,331   | 6,571,457   | 6,571,457   |
| Discount Factor             | 1.21      | 1.10       | 1.00       | 0.91       | 0.83        | 0.75        | 0.68        | 0.62        | 0.56        | 0.51        | 0.47        |
| Annual Present Value        |           |            |            | 2,721,688  | 5,430,956   | 4,937,233   | 4,488,393   | 4,080,358   | 3,407,352   | 3,372,196   | 3,065,633   |
| TPI + Interest              | 6,362,277 | 28,489,600 | 21,216,562 |            |             |             |             |             |             |             |             |
| NPV                         |           |            | 0          |            |             |             |             |             |             |             |             |

**Table S11. Discounted cashflow sheet of biomethane production in China (continued)**

| Year                        | 9           | 10          | 11         | 12         | 13         | 14         | 15         | 16         | 17         | 18         | 19         |
|-----------------------------|-------------|-------------|------------|------------|------------|------------|------------|------------|------------|------------|------------|
| Capital Investment          |             |             |            |            |            |            |            |            |            |            |            |
| Land                        |             |             |            |            |            |            |            |            |            |            |            |
| Working Capital             |             |             |            |            |            |            |            |            |            |            |            |
| Loan Payment                | 6,353,085   | 6,353,085   | 6,353,085  | 6,353,085  | 6,353,085  | 6,353,085  | 6,353,085  | 0          | 0          | 0          | 0          |
| Loan Interest Payment       | 2,396,703   | 2,119,756   | 1,823,423  | 1,506,347  | 1,167,075  | 804,055    | 415,622    | 0          | 0          | 0          | 0          |
| Loan Principal              | 30,282,232  | 26,048,903  | 21,519,241 | 16,672,503 | 11,486,493 | 5,937,463  | 0          | 0          | 0          | 0          | 0          |
| Methane                     | 33,987,692  | 33,987,692  | 33,987,692 | 33,987,692 | 33,987,692 | 33,987,692 | 33,987,692 | 33,987,692 | 33,987,692 | 33,987,692 | 33,987,692 |
| Other sales                 | 1,767,359   | 1,767,359   | 1,767,359  | 1,767,359  | 1,767,359  | 1,767,359  | 1,767,359  | 1,767,359  | 1,767,359  | 1,767,359  | 1,767,359  |
| Total Annual Sales          | 35,755,051  | 35,755,051  | 35,755,051 | 35,755,051 | 35,755,051 | 35,755,051 | 35,755,051 | 35,755,051 | 35,755,051 | 35,755,051 | 35,755,051 |
| Annual Manufacturing Cost   |             |             |            |            |            |            |            |            |            |            |            |
| Raw Material cost           | 14,016,667  | 14,016,667  | 14,016,667 | 14,016,667 | 14,016,667 | 14,016,667 | 14,016,667 | 14,016,667 | 14,016,667 | 14,016,667 | 14,016,667 |
| Utility cost                | 1,320,320   | 1,320,320   | 1,320,320  | 1,320,320  | 1,320,320  | 1,320,320  | 1,320,320  | 1,320,320  | 1,320,320  | 1,320,320  | 1,320,320  |
| Baghouse Bags               |             |             | 535,125    |            |            |            |            | 535,125    |            |            |            |
| Fixed Operating Costs       | 7,493,523   | 7,493,523   | 7,493,523  | 7,493,523  | 7,493,523  | 7,493,523  | 7,493,523  | 7,493,523  | 7,493,523  | 7,493,523  | 7,493,523  |
| Total Product Cost          | 22,830,510  | 22,830,510  | 23,365,635 | 22,830,510 | 22,830,510 | 22,830,510 | 22,830,510 | 23,365,635 | 22,830,510 | 22,830,510 | 22,830,510 |
| Annual Depreciation         |             |             |            |            |            |            |            |            |            |            |            |
| <u>General Plant</u>        |             |             |            |            |            |            |            |            |            |            |            |
| Depreciation Charge         |             |             |            |            |            |            |            |            |            |            |            |
| Remaining Value             |             |             |            |            |            |            |            |            |            |            |            |
| <u>Heat and Power Plant</u> | 4.46%       | 4.46%       | 4.46%      | 4.46%      | 4.46%      | 4.46%      | 4.46%      | 4.46%      | 4.46%      | 4.46%      | 4.46%      |
| Depreciation Charge         | 320,676     | 320,604     | 320,676    | 320,604    | 320,676    | 320,604    | 320,676    | 320,604    | 320,676    | 320,604    | 320,676    |
| Remaining Value             | 3,687,340   | 3,366,737   | 3,046,061  | 2,725,457  | 2,404,781  | 2,084,177  | 1,763,501  | 1,442,897  | 1,122,222  | 801,618    | 480,942    |
| Net Revenue                 | 10,207,163  | 10,484,182  | 10,245,317 | 11,097,591 | 11,436,791 | 11,799,883 | 12,188,244 | 12,068,812 | 12,603,866 | 12,603,938 | 12,603,866 |
| Losses Forward              | -20,347,237 | -10,140,074 | 0          | 0          | 0          | 0          | 0          | 0          | 0          | 0          | 0          |
| Taxable Income              | -10,140,074 | 344,107     | 10,245,317 | 11,097,591 | 11,436,791 | 11,799,883 | 12,188,244 | 12,068,812 | 12,603,866 | 12,603,938 | 12,603,866 |
| Income Tax                  | 0           | 120,438     | 3,585,861  | 3,884,157  | 4,002,877  | 4,129,959  | 4,265,885  | 4,224,084  | 4,411,353  | 4,411,378  | 4,411,353  |
| Annual Cash Flow            | 6,571,457   | 6,451,019   | 2,450,470  | 2,687,300  | 2,568,580  | 2,441,498  | 2,305,571  | 8,165,332  | 8,513,189  | 8,513,164  | 8,513,189  |
| Discount Factor             | 0.42        | 0.39        | 0.35       | 0.32       | 0.29       | 0.26       | 0.24       | 0.22       | 0.20       | 0.18       | 0.16       |
| Annual Present Value        | 2,786,939   | 2,487,147   | 858,875    | 856,257    | 744,026    | 642,923    | 551,935    | 1,777,014  | 1,684,289  | 1,531,167  | 1,391,974  |
| TPI + Interest              |             |             |            |            |            |            |            |            |            |            |            |
| NPV                         |             |             |            |            |            |            |            |            |            |            |            |

**Table S11. Discounted cashflow sheet of biomethane production in China (continued)**

| Year                        | 20         | 21         | 22         | 23         | 24         | 25         | 26         | 27         | 28         | 29         | 30         |
|-----------------------------|------------|------------|------------|------------|------------|------------|------------|------------|------------|------------|------------|
| Capital Investment          |            |            |            |            |            |            |            |            |            |            |            |
| Land                        |            |            |            |            |            |            |            |            |            |            | -1,848,000 |
| Working Capital             |            |            |            |            |            |            |            |            |            |            | -4,821,946 |
| Loan Payment                |            |            |            |            |            |            |            |            |            |            |            |
| Loan Interest Payment       |            |            |            |            |            |            |            |            |            |            |            |
| Loan Principal              |            |            |            |            |            |            |            |            |            |            |            |
| Methane                     | 33,987,692 | 33,987,692 | 33,987,692 | 33,987,692 | 33,987,692 | 33,987,692 | 33,987,692 | 33,987,692 | 33,987,692 | 33,987,692 | 33,987,692 |
| Other sales                 | 1,767,359  | 1,767,359  | 1,767,359  | 1,767,359  | 1,767,359  | 1,767,359  | 1,767,359  | 1,767,359  | 1,767,359  | 1,767,359  | 1,767,359  |
| Total Annual Sales          | 35,755,051 | 35,755,051 | 35,755,051 | 35,755,051 | 35,755,051 | 35,755,051 | 35,755,051 | 35,755,051 | 35,755,051 | 35,755,051 | 35,755,051 |
| Annual Manufacturing Cost   |            |            |            |            |            |            |            |            |            |            |            |
| Raw Material cost           | 14,016,667 | 14,016,667 | 14,016,667 | 14,016,667 | 14,016,667 | 14,016,667 | 14,016,667 | 14,016,667 | 14,016,667 | 14,016,667 | 14,016,667 |
| Utility cost                | 1,320,320  | 1,320,320  | 1,320,320  | 1,320,320  | 1,320,320  | 1,320,320  | 1,320,320  | 1,320,320  | 1,320,320  | 1,320,320  | 1,320,320  |
| Baghouse Bags               |            | 535,125    |            |            |            |            | 535,125    |            |            |            |            |
| Fixed Operating Costs       | 7,493,523  | 7,493,523  | 7,493,523  | 7,493,523  | 7,493,523  | 7,493,523  | 7,493,523  | 7,493,523  | 7,493,523  | 7,493,523  | 7,493,523  |
| Total Product Cost          | 22,830,510 | 23,365,635 | 22,830,510 | 22,830,510 | 22,830,510 | 22,830,510 | 23,365,635 | 22,830,510 | 22,830,510 | 22,830,510 | 22,830,510 |
| Annual Depreciation         |            |            |            |            |            |            |            |            |            |            |            |
| <u>General Plant</u>        |            |            |            |            |            |            |            |            |            |            |            |
| Depreciation Charge         |            |            |            |            |            |            |            |            |            |            |            |
| Remaining Value             |            |            |            |            |            |            |            |            |            |            |            |
| <u>Heat and Power Plant</u> | 4.46%      | 2.23%      |            |            |            |            |            |            |            |            |            |
| Depreciation Charge         | 320,604    | 160,338    |            |            |            |            |            |            |            |            |            |
| Remaining Value             | 160,338    | 0          |            |            |            |            |            |            |            |            |            |
| Net Revenue                 | 12,603,938 | 12,229,078 | 12,924,542 | 12,924,542 | 12,924,542 | 12,924,542 | 12,389,416 | 12,924,542 | 12,924,542 | 12,924,542 | 12,924,542 |
| Losses Forward              | 0          | 0          | 0          | 0          | 0          | 0          | 0          | 0          | 0          | 0          | 0          |
| Taxable Income              | 12,603,938 | 12,229,078 | 12,924,542 | 12,924,542 | 12,924,542 | 12,924,542 | 12,389,416 | 12,924,542 | 12,924,542 | 12,924,542 | 12,924,542 |
| Income Tax                  | 4,411,378  | 4,280,177  | 4,523,590  | 4,523,590  | 4,523,590  | 4,523,590  | 4,336,296  | 4,523,590  | 4,523,590  | 4,523,590  | 4,523,590  |
| Annual Cash Flow            | 8,513,164  | 8,109,239  | 8,400,952  | 8,400,952  | 8,400,952  | 8,400,952  | 8,053,121  | 8,400,952  | 8,400,952  | 8,400,952  | 8,400,952  |
| Discount Factor             | 0.15       | 0.14       | 0.12       | 0.11       | 0.10       | 0.09       | 0.08       | 0.08       | 0.07       | 0.06       | 0.06       |
| Annual Present Value        | 1,265,428  | 1,095,806  | 1,032,023  | 938,203    | 852,912    | 775,374    | 675,701    | 640,805    | 582,550    | 529,591    | 481,446    |
| TPI + Interest              |            |            |            |            |            |            |            |            |            |            | -382,245   |
| NPV                         |            |            |            |            |            |            |            |            |            |            |            |

**Table S12. Discounted cashflow sheet of biomethane production in India**

| Year                        | -2        | -1         | 0          | 1          | 2           | 3           | 4           | 5           | 6           | 7           | 8           |
|-----------------------------|-----------|------------|------------|------------|-------------|-------------|-------------|-------------|-------------|-------------|-------------|
| Capital Investment          | 3,599,161 | 26,993,711 | 14,396,646 |            |             |             |             |             |             |             |             |
| Land                        | 1,848,000 |            |            |            |             |             |             |             |             |             |             |
| Working Capital             |           |            | 5,623,690  |            |             |             |             |             |             |             |             |
| Loan Payment                |           |            |            | 7,409,411  | 7,409,411   | 7,409,411   | 7,409,411   | 7,409,411   | 7,409,411   | 7,409,411   | 7,409,411   |
| Loan Interest Payment       | 377,912   | 3,212,252  | 4,723,899  | 4,723,899  | 4,535,914   | 4,334,769   | 4,119,544   | 3,889,253   | 3,642,842   | 3,379,182   | 3,097,066   |
| Loan Principal              | 5,398,742 | 45,889,308 | 67,484,277 | 64,798,765 | 61,925,268  | 58,850,626  | 55,560,759  | 52,040,601  | 48,274,032  | 44,243,804  | 39,931,459  |
| Methane                     |           |            |            | 31,820,014 | 36,365,730  | 36,365,730  | 36,365,730  | 36,365,730  | 36,365,730  | 36,365,730  | 36,365,730  |
| Other sales                 |           |            |            | 1,878,355  | 2,146,691   | 2,146,691   | 2,146,691   | 2,146,691   | 2,146,691   | 2,146,691   | 2,146,691   |
| Total Annual Sales          |           |            |            | 33,698,369 | 38,512,421  | 38,512,421  | 38,512,421  | 38,512,421  | 38,512,421  | 38,512,421  | 38,512,421  |
| Annual Manufacturing Cost   |           |            |            | 14,713,240 |             |             |             |             |             |             |             |
| Raw Material cost           |           |            |            | 13,140,625 | 14,016,667  | 14,016,667  | 14,016,667  | 14,016,667  | 14,016,667  | 14,016,667  | 14,016,667  |
| Utility cost                |           |            |            | 1,572,615  | 1,677,456   | 1,677,456   | 1,677,456   | 1,677,456   | 1,677,456   | 1,677,456   | 1,677,456   |
| Baghouse Bags               |           |            |            | 535,125    |             |             |             |             | 535,125     |             |             |
| Fixed Operating Costs       |           |            |            | 7,350,201  | 7,840,214   | 7,840,214   | 7,840,214   | 7,840,214   | 7,840,214   | 7,840,214   | 7,840,214   |
| Total Product Cost          |           |            |            | 22,598,566 | 23,534,337  | 23,534,337  | 23,534,337  | 23,534,337  | 24,069,462  | 23,534,337  | 23,534,337  |
| Annual Depreciation         |           |            |            |            |             |             |             |             |             |             |             |
| <u>General Plant</u>        |           |            |            | 14%        | 24%         | 17%         | 12%         | 9%          | 9%          | 9%          | 4%          |
| Depreciation Charge         |           |            |            | 14,856,701 | 25,461,205  | 18,183,604  | 12,985,318  | 9,284,139   | 9,273,742   | 9,284,139   | 4,636,871   |
| Remaining Value             |           |            |            | 89,109,018 | 63,647,813  | 45,464,209  | 32,478,891  | 23,194,752  | 13,921,010  | 4,636,871   | 0           |
| <u>Heat and Power Plant</u> |           |            |            | 3.75%      | 7.22%       | 6.68%       | 6.18%       | 5.71%       | 5.29%       | 4.89%       | 4.52%       |
| Depreciation Charge         |           |            |            | 319,053    | 614,198     | 568,084     | 525,544     | 486,066     | 449,652     | 415,875     | 384,735     |
| Remaining Value             |           |            |            | 8,189,022  | 7,574,825   | 7,006,740   | 6,481,197   | 5,995,130   | 5,545,478   | 5,129,604   | 4,744,869   |
| Net Revenue                 |           |            |            | -8,799,851 | -15,633,232 | -8,108,373  | -2,652,322  | 1,318,626   | 1,076,723   | 1,898,889   | 6,859,412   |
| Losses Forward              |           |            |            |            | -8,799,851  | -24,433,083 | -32,541,456 | -35,193,777 | -33,875,151 | -32,798,428 | -30,899,539 |
| Taxable Income              |           |            |            | -8,799,851 | -24,433,083 | -32,541,456 | -35,193,777 | -33,875,151 | -32,798,428 | -30,899,539 | -24,040,127 |
| Income Tax                  |           |            |            | 0          | 0           | 0           | 0           | 0           | 0           | 0           | 0           |
| Annual Cash Flow            |           |            |            | 3,690,392  | 7,568,674   | 7,568,674   | 7,568,674   | 7,568,674   | 7,033,548   | 7,568,674   | 7,568,674   |
| Discount Factor             | 1.21      | 1.10       | 1.00       | 0.91       | 0.83        | 0.75        | 0.68        | 0.62        | 0.56        | 0.51        | 0.47        |
| Annual Present Value        |           |            |            | 3,354,901  | 6,255,102   | 5,686,457   | 5,169,506   | 4,699,551   | 3,970,255   | 3,883,926   | 3,530,842   |
| TPI + Interest              | 7,048,339 | 33,226,559 | 24,744,235 |            |             |             |             |             |             |             |             |
| NPV                         |           |            | 0          |            |             |             |             |             |             |             |             |

**Table S12. Discounted cashflow sheet of biomethane production in India (continued)**

| Year                      | 9           | 10          | 11         | 12         | 13         | 14         | 15         | 16         | 17         | 18         | 19         |
|---------------------------|-------------|-------------|------------|------------|------------|------------|------------|------------|------------|------------|------------|
| Capital Investment        |             |             |            |            |            |            |            |            |            |            |            |
| Land                      |             |             |            |            |            |            |            |            |            |            |            |
| Working Capital           |             |             |            |            |            |            |            |            |            |            |            |
| Loan Payment              | 7,409,411   | 7,409,411   | 7,409,411  | 7,409,411  | 7,409,411  | 7,409,411  | 7,409,411  | 0          | 0          | 0          | 0          |
| Loan Interest Payment     | 2,795,202   | 2,472,208   | 2,126,603  | 1,756,807  | 1,361,125  | 937,744    | 484,728    | 0          | 0          | 0          | 0          |
| Loan Principal            | 35,317,251  | 30,380,047  | 25,097,240 | 19,444,636 | 13,396,349 | 6,924,683  | 0          | 0          | 0          | 0          | 0          |
| Methane                   | 36,365,730  | 36,365,730  | 36,365,730 | 36,365,730 | 36,365,730 | 36,365,730 | 36,365,730 | 36,365,730 | 36,365,730 | 36,365,730 | 36,365,730 |
| Other sales               | 2,146,691   | 2,146,691   | 2,146,691  | 2,146,691  | 2,146,691  | 2,146,691  | 2,146,691  | 2,146,691  | 2,146,691  | 2,146,691  | 2,146,691  |
| Total Annual Sales        | 38,512,421  | 38,512,421  | 38,512,421 | 38,512,421 | 38,512,421 | 38,512,421 | 38,512,421 | 38,512,421 | 38,512,421 | 38,512,421 | 38,512,421 |
| Annual Manufacturing Cost |             |             |            |            |            |            |            |            |            |            |            |
| Raw Material cost         | 14,016,667  | 14,016,667  | 14,016,667 | 14,016,667 | 14,016,667 | 14,016,667 | 14,016,667 | 14,016,667 | 14,016,667 | 14,016,667 | 14,016,667 |
| Utility cost              | 1,677,456   | 1,677,456   | 1,677,456  | 1,677,456  | 1,677,456  | 1,677,456  | 1,677,456  | 1,677,456  | 1,677,456  | 1,677,456  | 1,677,456  |
| Baghouse Bags             |             |             | 535,125    |            |            |            |            | 535,125    |            |            |            |
| Fixed Operating Costs     | 7,840,214   | 7,840,214   | 7,840,214  | 7,840,214  | 7,840,214  | 7,840,214  | 7,840,214  | 7,840,214  | 7,840,214  | 7,840,214  | 7,840,214  |
| Total Product Cost        | 23,534,337  | 23,534,337  | 24,069,462 | 23,534,337 | 23,534,337 | 23,534,337 | 23,534,337 | 24,069,462 | 23,534,337 | 23,534,337 | 23,534,337 |
| Annual Depreciation       |             |             |            |            |            |            |            |            |            |            |            |
| General Plant             |             |             |            |            |            |            |            |            |            |            |            |
| Depreciation Charge       |             |             |            |            |            |            |            |            |            |            |            |
| Remaining Value           |             |             |            |            |            |            |            |            |            |            |            |
| Heat and Power Plant      | 4.46%       | 4.46%       | 4.46%      | 4.46%      | 4.46%      | 4.46%      | 4.46%      | 4.46%      | 4.46%      | 4.46%      | 4.46%      |
| Depreciation Charge       | 379,630     | 379,545     | 379,630    | 379,545    | 379,630    | 379,545    | 379,630    | 379,545    | 379,630    | 379,545    | 379,630    |
| Remaining Value           | 4,365,238   | 3,985,693   | 3,606,063  | 3,226,517  | 2,846,887  | 2,467,342  | 2,087,712  | 1,708,166  | 1,328,536  | 948,991    | 569,360    |
| Net Revenue               | 11,803,252  | 12,126,332  | 11,936,725 | 12,841,732 | 13,237,330 | 13,660,795 | 14,113,726 | 14,063,414 | 14,598,454 | 14,598,539 | 14,598,454 |
| Losses Forward            | -24,040,127 | -12,236,875 | -110,544   | 0          | 0          | 0          | 0          | 0          | 0          | 0          | 0          |
| Taxable Income            | -12,236,875 | -110,544    | 11,826,182 | 12,841,732 | 13,237,330 | 13,660,795 | 14,113,726 | 14,063,414 | 14,598,454 | 14,598,539 | 14,598,454 |
| Income Tax                | 0           | 0           | 4,139,164  | 4,494,606  | 4,633,065  | 4,781,278  | 4,939,804  | 4,922,195  | 5,109,459  | 5,109,489  | 5,109,459  |
| Annual Cash Flow          | 7,568,674   | 7,568,674   | 2,894,385  | 3,074,067  | 2,935,608  | 2,787,395  | 2,628,869  | 9,520,764  | 9,868,626  | 9,868,596  | 9,868,626  |
| Discount Factor           | 0.42        | 0.39        | 0.35       | 0.32       | 0.29       | 0.26       | 0.24       | 0.22       | 0.20       | 0.18       | 0.16       |
| Annual Present Value      | 3,209,856   | 2,918,051   | 1,014,464  | 979,493    | 850,341    | 734,008    | 629,330    | 2,071,996  | 1,952,455  | 1,774,954  | 1,613,599  |
| TPI + Interest            |             |             |            |            |            |            |            |            |            |            |            |
| NPV                       |             |             |            |            |            |            |            |            |            |            |            |

**Table S12. Discounted cashflow sheet of biomethane production in India (continued)**

| Year                             | 20         | 21         | 22         | 23         | 24         | 25         | 26         | 27         | 28         | 29         | 30         |            |
|----------------------------------|------------|------------|------------|------------|------------|------------|------------|------------|------------|------------|------------|------------|
| <b>Capital Investment</b>        |            |            |            |            |            |            |            |            |            |            |            |            |
| Land                             |            |            |            |            |            |            |            |            |            |            |            | -1,848,000 |
| Working Capital                  |            |            |            |            |            |            |            |            |            |            |            | -5,623,690 |
| <b>Loan Payment</b>              |            |            |            |            |            |            |            |            |            |            |            |            |
| Loan Interest Payment            |            |            |            |            |            |            |            |            |            |            |            |            |
| Loan Principal                   |            |            |            |            |            |            |            |            |            |            |            |            |
| Methane                          | 36,365,730 | 36,365,730 | 36,365,730 | 36,365,730 | 36,365,730 | 36,365,730 | 36,365,730 | 36,365,730 | 36,365,730 | 36,365,730 | 36,365,730 | 36,365,730 |
| Other sales                      | 2,146,691  | 2,146,691  | 2,146,691  | 2,146,691  | 2,146,691  | 2,146,691  | 2,146,691  | 2,146,691  | 2,146,691  | 2,146,691  | 2,146,691  | 2,146,691  |
| Total Annual Sales               | 38,512,421 | 38,512,421 | 38,512,421 | 38,512,421 | 38,512,421 | 38,512,421 | 38,512,421 | 38,512,421 | 38,512,421 | 38,512,421 | 38,512,421 | 38,512,421 |
| <b>Annual Manufacturing Cost</b> |            |            |            |            |            |            |            |            |            |            |            |            |
| Raw Material cost                | 14,016,667 | 14,016,667 | 14,016,667 | 14,016,667 | 14,016,667 | 14,016,667 | 14,016,667 | 14,016,667 | 14,016,667 | 14,016,667 | 14,016,667 | 14,016,667 |
| Utility cost                     | 1,677,456  | 1,677,456  | 1,677,456  | 1,677,456  | 1,677,456  | 1,677,456  | 1,677,456  | 1,677,456  | 1,677,456  | 1,677,456  | 1,677,456  | 1,677,456  |
| Baghouse Bags                    |            | 535,125    |            |            |            |            | 535,125    |            |            |            |            |            |
| Fixed Operating Costs            | 7,840,214  | 7,840,214  | 7,840,214  | 7,840,214  | 7,840,214  | 7,840,214  | 7,840,214  | 7,840,214  | 7,840,214  | 7,840,214  | 7,840,214  | 7,840,214  |
| Total Product Cost               | 23,534,337 | 24,069,462 | 23,534,337 | 23,534,337 | 23,534,337 | 23,534,337 | 24,069,462 | 23,534,337 | 23,534,337 | 23,534,337 | 23,534,337 | 23,534,337 |
| <b>Annual Depreciation</b>       |            |            |            |            |            |            |            |            |            |            |            |            |
| <u>General Plant</u>             |            |            |            |            |            |            |            |            |            |            |            |            |
| Depreciation Charge              |            |            |            |            |            |            |            |            |            |            |            |            |
| Remaining Value                  |            |            |            |            |            |            |            |            |            |            |            |            |
| <u>Heat and Power Plant</u>      | 4.46%      | 2.23%      |            |            |            |            |            |            |            |            |            |            |
| Depreciation Charge              | 379,545    | 189,815    |            |            |            |            |            |            |            |            |            |            |
| Remaining Value                  | 189,815    | 0          |            |            |            |            |            |            |            |            |            |            |
| Net Revenue                      | 14,598,539 | 14,253,144 | 14,978,084 | 14,978,084 | 14,978,084 | 14,978,084 | 14,442,959 | 14,978,084 | 14,978,084 | 14,978,084 | 14,978,084 | 14,978,084 |
| Losses Forward                   | 0          | 0          | 0          | 0          | 0          | 0          | 0          | 0          | 0          | 0          | 0          | 0          |
| Taxable Income                   | 14,598,539 | 14,253,144 | 14,978,084 | 14,978,084 | 14,978,084 | 14,978,084 | 14,442,959 | 14,978,084 | 14,978,084 | 14,978,084 | 14,978,084 | 14,978,084 |
| Income Tax                       | 5,109,489  | 4,988,600  | 5,242,330  | 5,242,330  | 5,242,330  | 5,242,330  | 5,055,036  | 5,242,330  | 5,242,330  | 5,242,330  | 5,242,330  | 5,242,330  |
| Annual Cash Flow                 | 9,868,596  | 9,454,359  | 9,735,755  | 9,735,755  | 9,735,755  | 9,735,755  | 9,387,923  | 9,735,755  | 9,735,755  | 9,735,755  | 9,735,755  | 9,735,755  |
| Discount Factor                  | 0.15       | 0.14       | 0.12       | 0.11       | 0.10       | 0.09       | 0.08       | 0.08       | 0.07       | 0.06       | 0.06       | 0.06       |
| Annual Present Value             | 1,466,904  | 1,277,573  | 1,195,998  | 1,087,271  | 988,428    | 898,571    | 787,698    | 742,621    | 675,110    | 613,736    | 557,942    | 557,942    |
| TPI + Interest                   |            |            |            |            |            |            |            |            |            |            |            | -428,192   |
| NPV                              |            |            |            |            |            |            |            |            |            |            |            |            |



**Table S13. Discounted cashflow sheet of biomethane production in USA**

| Year                        | -2        | -1         | 0          | 1          | 2           | 3           | 4           | 5           | 6           | 7           | 8           |
|-----------------------------|-----------|------------|------------|------------|-------------|-------------|-------------|-------------|-------------|-------------|-------------|
| Capital Investment          | 3,906,135 | 29,296,012 | 15,624,540 |            |             |             |             |             |             |             |             |
| Land                        | 1,848,000 |            |            |            |             |             |             |             |             |             |             |
| Working Capital             |           |            | 6,103,336  |            |             |             |             |             |             |             |             |
| Loan Payment                |           |            |            | 8,041,362  | 8,041,362   | 8,041,362   | 8,041,362   | 8,041,362   | 8,041,362   | 8,041,362   | 8,041,362   |
| Loan Interest Payment       | 410,144   | 3,486,225  | 5,126,802  | 5,126,802  | 4,922,783   | 4,704,482   | 4,470,901   | 4,220,969   | 3,953,541   | 3,667,394   | 3,361,216   |
| Loan Principal              | 5,859,202 | 49,803,220 | 73,240,029 | 70,325,470 | 67,206,891  | 63,870,012  | 60,299,551  | 56,479,158  | 52,391,338  | 48,017,370  | 43,337,224  |
| Methane                     |           |            |            | 32,890,460 | 37,589,097  | 37,589,097  | 37,589,097  | 37,589,097  | 37,589,097  | 37,589,097  | 37,589,097  |
| Other sales                 |           |            |            | 2,290,488  | 2,617,701   | 2,617,701   | 2,617,701   | 2,617,701   | 2,617,701   | 2,617,701   | 2,617,701   |
| Total Annual Sales          |           |            |            | 35,180,948 | 40,206,798  | 40,206,798  | 40,206,798  | 40,206,798  | 40,206,798  | 40,206,798  | 40,206,798  |
| Annual Manufacturing Cost   |           |            |            | 14,950,984 |             |             |             |             |             |             |             |
| Raw Material cost           |           |            |            | 13,140,625 | 14,016,667  | 14,016,667  | 14,016,667  | 14,016,667  | 14,016,667  | 14,016,667  | 14,016,667  |
| Utility cost                |           |            |            | 1,810,359  | 1,931,049   | 1,931,049   | 1,931,049   | 1,931,049   | 1,931,049   | 1,931,049   | 1,931,049   |
| Baghouse Bags               |           |            |            | 535,125    |             |             |             |             | 535,125     |             |             |
| Fixed Operating Costs       |           |            |            | 7,549,360  | 8,052,651   | 8,052,651   | 8,052,651   | 8,052,651   | 8,052,651   | 8,052,651   | 8,052,651   |
| Total Product Cost          |           |            |            | 23,035,469 | 24,000,367  | 24,000,367  | 24,000,367  | 24,000,367  | 24,535,492  | 24,000,367  | 24,000,367  |
| Annual Depreciation         |           |            |            |            |             |             |             |             |             |             |             |
| <u>General Plant</u>        |           |            |            | 14%        | 24%         | 17%         | 12%         | 9%          | 9%          | 9%          | 4%          |
| Depreciation Charge         |           |            |            | 16,159,291 | 27,693,565  | 19,777,887  | 14,123,831  | 10,098,143  | 10,086,835  | 10,098,143  | 5,043,418   |
| Remaining Value             |           |            |            | 96,921,822 | 69,228,257  | 49,450,371  | 35,326,540  | 25,228,396  | 15,141,561  | 5,043,418   | 0           |
| <u>Heat and Power Plant</u> |           |            |            | 3.75%      | 7.22%       | 6.68%       | 6.18%       | 5.71%       | 5.29%       | 4.89%       | 4.52%       |
| Depreciation Charge         |           |            |            | 336,960    | 648,671     | 599,969     | 555,041     | 513,347     | 474,889     | 439,216     | 406,329     |
| Remaining Value             |           |            |            | 8,648,643  | 7,999,972   | 7,400,003   | 6,844,963   | 6,331,615   | 5,856,726   | 5,417,510   | 5,011,181   |
| Net Revenue                 |           |            |            | -9,477,575 | -17,058,587 | -8,875,907  | -2,943,342  | 1,373,971   | 1,156,040   | 2,001,677   | 7,395,468   |
| Losses Forward              |           |            |            |            | -9,477,575  | -26,536,162 | -35,412,069 | -38,355,411 | -36,981,439 | -35,825,399 | -33,823,722 |
| Taxable Income              |           |            |            | -9,477,575 | -26,536,162 | -35,412,069 | -38,355,411 | -36,981,439 | -35,825,399 | -33,823,722 | -26,428,253 |
| Income Tax                  |           |            |            | 0          | 0           | 0           | 0           | 0           | 0           | 0           | 0           |
| Annual Cash Flow            |           |            |            | 4,104,117  | 8,165,069   | 8,165,069   | 8,165,069   | 8,165,069   | 7,629,944   | 8,165,069   | 8,165,069   |
| Discount Factor             | 1.21      | 1.10       | 1.00       | 0.91       | 0.83        | 0.75        | 0.68        | 0.62        | 0.56        | 0.51        | 0.47        |
| Annual Present Value        |           |            |            | 3,731,015  | 6,747,991   | 6,134,537   | 5,576,852   | 5,069,866   | 4,306,904   | 4,189,972   | 3,809,065   |
| TPI + Interest              | 7,458,778 | 36,060,461 | 26,854,677 |            |             |             |             |             |             |             |             |
| NPV                         |           |            | 0          |            |             |             |             |             |             |             |             |

**Table S13. Discounted cashflow sheet of biomethane production in USA (continued)**

| Year                        | 9           | 10          | 11         | 12         | 13         | 14         | 15         | 16         | 17         | 18         | 19         |
|-----------------------------|-------------|-------------|------------|------------|------------|------------|------------|------------|------------|------------|------------|
| Capital Investment          |             |             |            |            |            |            |            |            |            |            |            |
| Land                        |             |             |            |            |            |            |            |            |            |            |            |
| Working Capital             |             |             |            |            |            |            |            |            |            |            |            |
| Loan Payment                | 8,041,362   | 8,041,362   | 8,041,362  | 8,041,362  | 8,041,362  | 8,041,362  | 8,041,362  | 0          | 0          | 0          | 0          |
| Loan Interest Payment       | 3,033,606   | 2,683,063   | 2,307,982  | 1,906,645  | 1,477,215  | 1,017,725  | 526,070    | 0          | 0          | 0          | 0          |
| Loan Principal              | 38,329,469  | 32,971,170  | 27,237,790 | 21,103,074 | 14,538,928 | 7,515,291  | 0          | 0          | 0          | 0          | 0          |
| Methane                     | 37,589,097  | 37,589,097  | 37,589,097 | 37,589,097 | 37,589,097 | 37,589,097 | 37,589,097 | 37,589,097 | 37,589,097 | 37,589,097 | 37,589,097 |
| Other sales                 | 2,617,701   | 2,617,701   | 2,617,701  | 2,617,701  | 2,617,701  | 2,617,701  | 2,617,701  | 2,617,701  | 2,617,701  | 2,617,701  | 2,617,701  |
| Total Annual Sales          | 40,206,798  | 40,206,798  | 40,206,798 | 40,206,798 | 40,206,798 | 40,206,798 | 40,206,798 | 40,206,798 | 40,206,798 | 40,206,798 | 40,206,798 |
| Annual Manufacturing Cost   |             |             |            |            |            |            |            |            |            |            |            |
| Raw Material cost           | 14,016,667  | 14,016,667  | 14,016,667 | 14,016,667 | 14,016,667 | 14,016,667 | 14,016,667 | 14,016,667 | 14,016,667 | 14,016,667 | 14,016,667 |
| Utility cost                | 1,931,049   | 1,931,049   | 1,931,049  | 1,931,049  | 1,931,049  | 1,931,049  | 1,931,049  | 1,931,049  | 1,931,049  | 1,931,049  | 1,931,049  |
| Baghouse Bags               |             |             | 535,125    |            |            |            |            | 535,125    |            |            |            |
| Fixed Operating Costs       | 8,052,651   | 8,052,651   | 8,052,651  | 8,052,651  | 8,052,651  | 8,052,651  | 8,052,651  | 8,052,651  | 8,052,651  | 8,052,651  | 8,052,651  |
| Total Product Cost          | 24,000,367  | 24,000,367  | 24,535,492 | 24,000,367 | 24,000,367 | 24,000,367 | 24,000,367 | 24,535,492 | 24,000,367 | 24,000,367 | 24,000,367 |
| Annual Depreciation         |             |             |            |            |            |            |            |            |            |            |            |
| <u>General Plant</u>        |             |             |            |            |            |            |            |            |            |            |            |
| Depreciation Charge         |             |             |            |            |            |            |            |            |            |            |            |
| Remaining Value             |             |             |            |            |            |            |            |            |            |            |            |
| <u>Heat and Power Plant</u> | 4.46%       | 4.46%       | 4.46%      | 4.46%      | 4.46%      | 4.46%      | 4.46%      | 4.46%      | 4.46%      | 4.46%      | 4.46%      |
| Depreciation Charge         | 400,938     | 400,848     | 400,938    | 400,848    | 400,938    | 400,848    | 400,938    | 400,848    | 400,938    | 400,848    | 400,938    |
| Remaining Value             | 4,610,243   | 4,209,395   | 3,808,458  | 3,407,610  | 3,006,673  | 2,605,825  | 2,204,887  | 1,804,039  | 1,403,102  | 1,002,254  | 601,317    |
| Net Revenue                 | 12,771,887  | 13,122,520  | 12,962,386 | 13,898,938 | 14,328,278 | 14,787,858 | 15,279,423 | 15,270,458 | 15,805,493 | 15,805,583 | 15,805,493 |
| Losses Forward              | -26,428,253 | -13,656,366 | -533,846   | 0          | 0          | 0          | 0          | 0          | 0          | 0          | 0          |
| Taxable Income              | -13,656,366 | -533,846    | 12,428,540 | 13,898,938 | 14,328,278 | 14,787,858 | 15,279,423 | 15,270,458 | 15,805,493 | 15,805,583 | 15,805,493 |
| Income Tax                  | 0           | 0           | 4,349,989  | 4,864,628  | 5,014,897  | 5,175,750  | 5,347,798  | 5,344,660  | 5,531,923  | 5,531,954  | 5,531,923  |
| Annual Cash Flow            | 8,165,069   | 8,165,069   | 3,279,955  | 3,300,441  | 3,150,172  | 2,989,319  | 2,817,271  | 10,326,645 | 10,674,508 | 10,674,477 | 10,674,508 |
| Discount Factor             | 0.42        | 0.39        | 0.35       | 0.32       | 0.29       | 0.26       | 0.24       | 0.22       | 0.20       | 0.18       | 0.16       |
| Annual Present Value        | 3,462,786   | 3,147,988   | 1,149,604  | 1,051,622  | 912,493    | 787,181    | 674,432    | 2,247,379  | 2,111,895  | 1,919,898  | 1,745,367  |
| TPI + Interest              |             |             |            |            |            |            |            |            |            |            |            |
| NPV                         |             |             |            |            |            |            |            |            |            |            |            |

**Table S13. Discounted cashflow sheet of biomethane production in USA (continued)**

| Year                        | 20         | 21         | 22         | 23         | 24         | 25         | 26         | 27         | 28         | 29         | 30         |            |
|-----------------------------|------------|------------|------------|------------|------------|------------|------------|------------|------------|------------|------------|------------|
| Capital Investment          |            |            |            |            |            |            |            |            |            |            |            |            |
| Land                        |            |            |            |            |            |            |            |            |            |            |            | -1,848,000 |
| Working Capital             |            |            |            |            |            |            |            |            |            |            |            | -6,103,336 |
| Loan Payment                | 0          | 0          | 0          | 0          | 0          | 0          | 0          | 0          | 0          | 0          | 0          | 0          |
| Loan Interest Payment       | 0          | 0          | 0          | 0          | 0          | 0          | 0          | 0          | 0          | 0          | 0          | 0          |
| Loan Principal              | 0          | 0          | 0          | 0          | 0          | 0          | 0          | 0          | 0          | 0          | 0          | 0          |
| Methane                     | 37,589,097 | 37,589,097 | 37,589,097 | 37,589,097 | 37,589,097 | 37,589,097 | 37,589,097 | 37,589,097 | 37,589,097 | 37,589,097 | 37,589,097 | 37,589,097 |
| Other sales                 | 2,617,701  | 2,617,701  | 2,617,701  | 2,617,701  | 2,617,701  | 2,617,701  | 2,617,701  | 2,617,701  | 2,617,701  | 2,617,701  | 2,617,701  | 2,617,701  |
| Total Annual Sales          | 40,206,798 | 40,206,798 | 40,206,798 | 40,206,798 | 40,206,798 | 40,206,798 | 40,206,798 | 40,206,798 | 40,206,798 | 40,206,798 | 40,206,798 | 40,206,798 |
| Annual Manufacturing Cost   |            |            |            |            |            |            |            |            |            |            |            |            |
| Raw Material cost           | 14,016,667 | 14,016,667 | 14,016,667 | 14,016,667 | 14,016,667 | 14,016,667 | 14,016,667 | 14,016,667 | 14,016,667 | 14,016,667 | 14,016,667 | 14,016,667 |
| Utility cost                | 1,931,049  | 1,931,049  | 1,931,049  | 1,931,049  | 1,931,049  | 1,931,049  | 1,931,049  | 1,931,049  | 1,931,049  | 1,931,049  | 1,931,049  | 1,931,049  |
| Baghouse Bags               |            | 535,125    |            |            |            |            | 535,125    |            |            |            |            |            |
| Fixed Operating Costs       | 8,052,651  | 8,052,651  | 8,052,651  | 8,052,651  | 8,052,651  | 8,052,651  | 8,052,651  | 8,052,651  | 8,052,651  | 8,052,651  | 8,052,651  | 8,052,651  |
| Total Product Cost          | 24,000,367 | 24,535,492 | 24,000,367 | 24,000,367 | 24,000,367 | 24,000,367 | 24,535,492 | 24,000,367 | 24,000,367 | 24,000,367 | 24,000,367 | 24,000,367 |
| Annual Depreciation         |            |            |            |            |            |            |            |            |            |            |            |            |
| <u>General Plant</u>        |            |            |            |            |            |            |            |            |            |            |            |            |
| Depreciation Charge         |            |            |            |            |            |            |            |            |            |            |            |            |
| Remaining Value             |            |            |            |            |            |            |            |            |            |            |            |            |
| <u>Heat and Power Plant</u> | 4.46%      | 2.23%      |            |            |            |            |            |            |            |            |            |            |
| Depreciation Charge         | 400,848    | 200,469    |            |            |            |            |            |            |            |            |            |            |
| Remaining Value             | 200,469    | 0          |            |            |            |            |            |            |            |            |            |            |
| Net Revenue                 | 15,805,583 | 15,470,837 | 16,206,431 | 16,206,431 | 16,206,431 | 16,206,431 | 15,671,305 | 16,206,431 | 16,206,431 | 16,206,431 | 16,206,431 | 16,206,431 |
| Losses Forward              | 0          | 0          | 0          | 0          | 0          | 0          | 0          | 0          | 0          | 0          | 0          | 0          |
| Taxable Income              | 15,805,583 | 15,470,837 | 16,206,431 | 16,206,431 | 16,206,431 | 16,206,431 | 15,671,305 | 16,206,431 | 16,206,431 | 16,206,431 | 16,206,431 | 16,206,431 |
| Income Tax                  | 5,531,954  | 5,414,793  | 5,672,251  | 5,672,251  | 5,672,251  | 5,672,251  | 5,484,957  | 5,672,251  | 5,672,251  | 5,672,251  | 5,672,251  | 5,672,251  |
| Annual Cash Flow            | 10,674,477 | 10,256,513 | 10,534,180 | 10,534,180 | 10,534,180 | 10,534,180 | 10,186,348 | 10,534,180 | 10,534,180 | 10,534,180 | 10,534,180 | 10,534,180 |
| Discount Factor             | 0.15       | 0.14       | 0.12       | 0.11       | 0.10       | 0.09       | 0.08       | 0.08       | 0.07       | 0.06       | 0.06       | 0.06       |
| Annual Present Value        | 1,586,693  | 1,385,968  | 1,294,082  | 1,176,438  | 1,069,489  | 972,263    | 854,690    | 803,523    | 730,475    | 664,068    | 603,699    | 603,699    |
| TPI + Interest              |            |            |            |            |            |            |            |            |            |            |            | -455,680   |
| NPV                         |            |            |            |            |            |            |            |            |            |            |            |            |

**Table S14. Discounted cashflow sheet of biomethane production in Brazil**

| Year                        | -2        | -1         | 0          | 1           | 2           | 3           | 4           | 5           | 6           | 7           | 8           |
|-----------------------------|-----------|------------|------------|-------------|-------------|-------------|-------------|-------------|-------------|-------------|-------------|
| Capital Investment          | 4,188,164 | 31,411,234 | 16,752,658 |             |             |             |             |             |             |             |             |
| Land                        | 1,848,000 |            |            |             |             |             |             |             |             |             |             |
| Working Capital             |           |            | 6,544,007  |             |             |             |             |             |             |             |             |
| Loan Payment                |           |            |            | 8,621,961   | 8,621,961   | 8,621,961   | 8,621,961   | 8,621,961   | 8,621,961   | 8,621,961   | 8,621,961   |
| Loan Interest Payment       | 439,757   | 3,737,937  | 5,496,966  | 5,496,966   | 5,278,216   | 5,044,154   | 4,793,707   | 4,525,730   | 4,238,993   | 3,932,186   | 3,603,901   |
| Loan Principal              | 6,282,247 | 53,399,097 | 78,528,084 | 75,403,088  | 72,059,343  | 68,481,535  | 64,653,281  | 60,557,050  | 56,174,082  | 51,484,306  | 46,466,246  |
| Methane                     |           |            |            | 34,119,889  | 38,994,159  | 38,994,159  | 38,994,159  | 38,994,159  | 38,994,159  | 38,994,159  | 38,994,159  |
| Other sales                 |           |            |            | 2,469,219   | 2,821,964   | 2,821,964   | 2,821,964   | 2,821,964   | 2,821,964   | 2,821,964   | 2,821,964   |
| Total Annual Sales          |           |            |            | 36,589,108  | 41,816,123  | 41,816,123  | 41,816,123  | 41,816,123  | 41,816,123  | 41,816,123  | 41,816,123  |
| Annual Manufacturing Cost   |           |            |            | 15,213,115  |             |             |             |             |             |             |             |
| Raw Material cost           |           |            |            | 13,140,625  | 14,016,667  | 14,016,667  | 14,016,667  | 14,016,667  | 14,016,667  | 14,016,667  | 14,016,667  |
| Utility cost                |           |            |            | 2,072,490   | 2,210,656   | 2,210,656   | 2,210,656   | 2,210,656   | 2,210,656   | 2,210,656   | 2,210,656   |
| Baghouse Bags               |           |            |            | 535,125     |             |             |             | 535,125     |             |             |             |
| Fixed Operating Costs       |           |            |            | 7,738,742   | 8,254,658   | 8,254,658   | 8,254,658   | 8,254,658   | 8,254,658   | 8,254,658   | 8,254,658   |
| Total Product Cost          |           |            |            | 23,486,982  | 24,481,980  | 24,481,980  | 24,481,980  | 24,481,980  | 25,017,106  | 24,481,980  | 24,481,980  |
| Annual Depreciation         |           |            |            |             |             |             |             |             |             |             |             |
| <u>General Plant</u>        |           |            |            | 14%         | 24%         | 17%         | 12%         | 9%          | 9%          | 9%          | 4%          |
| Depreciation Charge         |           |            |            | 17,417,410  | 29,849,711  | 21,317,740  | 15,223,475  | 10,884,358  | 10,872,169  | 10,884,358  | 5,436,085   |
| Remaining Value             |           |            |            | 104,467,896 | 74,618,184  | 53,300,444  | 38,076,970  | 27,192,612  | 16,320,442  | 5,436,085   | 0           |
| <u>Heat and Power Plant</u> |           |            |            | 3.75%       | 7.22%       | 6.68%       | 6.18%       | 5.71%       | 5.29%       | 4.89%       | 4.52%       |
| Depreciation Charge         |           |            |            | 337,306     | 649,337     | 600,585     | 555,611     | 513,875     | 475,377     | 439,667     | 406,746     |
| Remaining Value             |           |            |            | 8,657,528   | 8,008,191   | 7,407,605   | 6,851,995   | 6,338,120   | 5,862,743   | 5,423,075   | 5,016,329   |
| Net Revenue                 |           |            |            | -10,149,556 | -18,443,122 | -9,628,336  | -3,238,650  | 1,410,181   | 1,212,478   | 2,077,932   | 7,887,411   |
| Losses Forward              |           |            |            |             | -10,149,556 | -28,592,678 | -38,221,014 | -41,459,664 | -40,049,483 | -38,837,005 | -36,759,073 |
| Taxable Income              |           |            |            | -10,149,556 | -28,592,678 | -38,221,014 | -41,459,664 | -40,049,483 | -38,837,005 | -36,759,073 | -28,871,663 |
| Income Tax                  |           |            |            | 0           | 0           | 0           | 0           | 0           | 0           | 0           | 0           |
| Annual Cash Flow            |           |            |            | 4,480,164   | 8,712,182   | 8,712,182   | 8,712,182   | 8,712,182   | 8,177,056   | 8,712,182   | 8,712,182   |
| Discount Factor             | 1.21      | 1.10       | 1.00       | 0.91        | 0.83        | 0.75        | 0.68        | 0.62        | 0.56        | 0.51        | 0.47        |
| Annual Present Value        |           |            |            | 4,072,877   | 7,200,150   | 6,545,591   | 5,950,537   | 5,409,579   | 4,615,735   | 4,470,727   | 4,064,297   |
| TPI + Interest              | 7,835,865 | 38,664,087 | 28,793,631 |             |             |             |             |             |             |             |             |
| NPV                         |           |            | 0          |             |             |             |             |             |             |             |             |

**Table S14. Discounted cashflow sheet of biomethane production in Brazil (continued)**

| Year                      | 9           | 10          | 11         | 12         | 13         | 14         | 15         | 16         | 17         | 18         | 19         |
|---------------------------|-------------|-------------|------------|------------|------------|------------|------------|------------|------------|------------|------------|
| Capital Investment        |             |             |            |            |            |            |            |            |            |            |            |
| Land                      |             |             |            |            |            |            |            |            |            |            |            |
| Working Capital           |             |             |            |            |            |            |            |            |            |            |            |
| Loan Payment              | 8,621,961   | 8,621,961   | 8,621,961  | 8,621,961  | 8,621,961  | 8,621,961  | 8,621,961  | 8,621,961  | 0          | 0          | 0          |
| Loan Interest Payment     | 3,252,637   | 2,876,784   | 2,474,622  | 2,044,308  | 1,583,873  | 1,091,206  | 564,054    | 0          | 0          | 0          | 0          |
| Loan Principal            | 41,096,921  | 35,351,744  | 29,204,405 | 22,626,752 | 15,588,663 | 8,057,908  | 0          | 0          | 0          | 0          | 0          |
| Methane                   | 38,994,159  | 38,994,159  | 38,994,159 | 38,994,159 | 38,994,159 | 38,994,159 | 38,994,159 | 38,994,159 | 38,994,159 | 38,994,159 | 38,994,159 |
| Other sales               | 2,821,964   | 2,821,964   | 2,821,964  | 2,821,964  | 2,821,964  | 2,821,964  | 2,821,964  | 2,821,964  | 2,821,964  | 2,821,964  | 2,821,964  |
| Total Annual Sales        | 41,816,123  | 41,816,123  | 41,816,123 | 41,816,123 | 41,816,123 | 41,816,123 | 41,816,123 | 41,816,123 | 41,816,123 | 41,816,123 | 41,816,123 |
| Annual Manufacturing Cost |             |             |            |            |            |            |            |            |            |            |            |
| Raw Material cost         | 14,016,667  | 14,016,667  | 14,016,667 | 14,016,667 | 14,016,667 | 14,016,667 | 14,016,667 | 14,016,667 | 14,016,667 | 14,016,667 | 14,016,667 |
| Utility cost              | 2,210,656   | 2,210,656   | 2,210,656  | 2,210,656  | 2,210,656  | 2,210,656  | 2,210,656  | 2,210,656  | 2,210,656  | 2,210,656  | 2,210,656  |
| Baghouse Bags             |             |             | 535,125    |            |            |            |            | 535,125    |            |            |            |
| Fixed Operating Costs     | 8,254,658   | 8,254,658   | 8,254,658  | 8,254,658  | 8,254,658  | 8,254,658  | 8,254,658  | 8,254,658  | 8,254,658  | 8,254,658  | 8,254,658  |
| Total Product Cost        | 24,481,980  | 24,481,980  | 25,017,106 | 24,481,980 | 24,481,980 | 24,481,980 | 24,481,980 | 25,017,106 | 24,481,980 | 24,481,980 | 24,481,980 |
| Annual Depreciation       |             |             |            |            |            |            |            |            |            |            |            |
| General Plant             |             |             |            |            |            |            |            |            |            |            |            |
| Depreciation Charge       |             |             |            |            |            |            |            |            |            |            |            |
| Remaining Value           |             |             |            |            |            |            |            |            |            |            |            |
| Heat and Power Plant      | 4.46%       | 4.46%       | 4.46%      | 4.46%      | 4.46%      | 4.46%      | 4.46%      | 4.46%      | 4.46%      | 4.46%      | 4.46%      |
| Depreciation Charge       | 401,349     | 401,260     | 401,349    | 401,260    | 401,349    | 401,260    | 401,349    | 401,260    | 401,349    | 401,260    | 401,349    |
| Remaining Value           | 4,614,979   | 4,213,720   | 3,812,370  | 3,411,111  | 3,009,761  | 2,608,502  | 2,207,152  | 1,805,893  | 1,404,543  | 1,003,284  | 601,934    |
| Net Revenue               | 13,680,156  | 14,056,099  | 13,923,046 | 14,888,575 | 15,348,921 | 15,841,677 | 16,368,740 | 16,397,758 | 16,932,794 | 16,932,884 | 16,932,794 |
| Losses Forward            | -28,871,663 | -15,191,506 | -1,135,407 | 0          | 0          | 0          | 0          | 0          | 0          | 0          | 0          |
| Taxable Income            | -15,191,506 | -1,135,407  | 12,787,639 | 14,888,575 | 15,348,921 | 15,841,677 | 16,368,740 | 16,397,758 | 16,932,794 | 16,932,884 | 16,932,794 |
| Income Tax                | 0           | 0           | 4,475,674  | 5,211,001  | 5,372,122  | 5,544,587  | 5,729,059  | 5,739,215  | 5,926,478  | 5,926,509  | 5,926,478  |
| Annual Cash Flow          | 8,712,182   | 8,712,182   | 3,701,383  | 3,501,180  | 3,340,059  | 3,167,595  | 2,983,123  | 11,059,802 | 11,407,665 | 11,407,634 | 11,407,665 |
| Discount Factor           | 0.42        | 0.39        | 0.35       | 0.32       | 0.29       | 0.26       | 0.24       | 0.22       | 0.20       | 0.18       | 0.16       |
| Annual Present Value      | 3,694,815   | 3,358,923   | 1,297,312  | 1,115,584  | 967,496    | 834,127    | 714,136    | 2,406,935  | 2,256,946  | 2,051,763  | 1,865,244  |
| TPI + Interest            |             |             |            |            |            |            |            |            |            |            |            |
| NPV                       |             |             |            |            |            |            |            |            |            |            |            |

**Table S14. Discounted cashflow sheet of biomethane production in Brazil (continued)**

| Year                             | 20         | 21         | 22         | 23         | 24         | 25         | 26         | 27         | 28         | 29         | 30         |            |
|----------------------------------|------------|------------|------------|------------|------------|------------|------------|------------|------------|------------|------------|------------|
| <b>Capital Investment</b>        |            |            |            |            |            |            |            |            |            |            |            |            |
| Land                             |            |            |            |            |            |            |            |            |            |            |            | -1,848,000 |
| Working Capital                  |            |            |            |            |            |            |            |            |            |            |            | -6,544,007 |
| Loan Payment                     | 0          | 0          | 0          | 0          | 0          | 0          | 0          | 0          | 0          | 0          | 0          | 0          |
| Loan Interest Payment            | 0          | 0          | 0          | 0          | 0          | 0          | 0          | 0          | 0          | 0          | 0          | 0          |
| Loan Principal                   | 0          | 0          | 0          | 0          | 0          | 0          | 0          | 0          | 0          | 0          | 0          | 0          |
| Methane                          | 38,994,159 | 38,994,159 | 38,994,159 | 38,994,159 | 38,994,159 | 38,994,159 | 38,994,159 | 38,994,159 | 38,994,159 | 38,994,159 | 38,994,159 | 38,994,159 |
| Other sales                      | 2,821,964  | 2,821,964  | 2,821,964  | 2,821,964  | 2,821,964  | 2,821,964  | 2,821,964  | 2,821,964  | 2,821,964  | 2,821,964  | 2,821,964  | 2,821,964  |
| Total Annual Sales               | 41,816,123 | 41,816,123 | 41,816,123 | 41,816,123 | 41,816,123 | 41,816,123 | 41,816,123 | 41,816,123 | 41,816,123 | 41,816,123 | 41,816,123 | 41,816,123 |
| <b>Annual Manufacturing Cost</b> |            |            |            |            |            |            |            |            |            |            |            |            |
| Raw Material cost                | 14,016,667 | 14,016,667 | 14,016,667 | 14,016,667 | 14,016,667 | 14,016,667 | 14,016,667 | 14,016,667 | 14,016,667 | 14,016,667 | 14,016,667 | 14,016,667 |
| Utility cost                     | 2,210,656  | 2,210,656  | 2,210,656  | 2,210,656  | 2,210,656  | 2,210,656  | 2,210,656  | 2,210,656  | 2,210,656  | 2,210,656  | 2,210,656  | 2,210,656  |
| Baghouse Bags                    |            | 535,125    |            |            |            |            | 535,125    |            |            |            |            |            |
| Fixed Operating Costs            | 8,254,658  | 8,254,658  | 8,254,658  | 8,254,658  | 8,254,658  | 8,254,658  | 8,254,658  | 8,254,658  | 8,254,658  | 8,254,658  | 8,254,658  | 8,254,658  |
| Total Product Cost               | 24,481,980 | 25,017,106 | 24,481,980 | 24,481,980 | 24,481,980 | 24,481,980 | 25,017,106 | 24,481,980 | 24,481,980 | 24,481,980 | 24,481,980 | 24,481,980 |
| <b>Annual Depreciation</b>       |            |            |            |            |            |            |            |            |            |            |            |            |
| <u>General Plant</u>             |            |            |            |            |            |            |            |            |            |            |            |            |
| Depreciation Charge              |            |            |            |            |            |            |            |            |            |            |            |            |
| Remaining Value                  |            |            |            |            |            |            |            |            |            |            |            |            |
| <u>Heat and Power Plant</u>      | 4.46%      | 2.23%      |            |            |            |            |            |            |            |            |            |            |
| Depreciation Charge              | 401,260    | 200,675    |            |            |            |            |            |            |            |            |            |            |
| Remaining Value                  | 200,675    | 0          |            |            |            |            |            |            |            |            |            |            |
| Net Revenue                      | 16,932,884 | 16,598,343 | 17,334,143 | 17,334,143 | 17,334,143 | 17,334,143 | 16,799,018 | 17,334,143 | 17,334,143 | 17,334,143 | 17,334,143 | 17,334,143 |
| Losses Forward                   | 0          | 0          | 0          | 0          | 0          | 0          | 0          | 0          | 0          | 0          | 0          | 0          |
| Taxable Income                   | 16,932,884 | 16,598,343 | 17,334,143 | 17,334,143 | 17,334,143 | 17,334,143 | 16,799,018 | 17,334,143 | 17,334,143 | 17,334,143 | 17,334,143 | 17,334,143 |
| Income Tax                       | 5,926,509  | 5,809,420  | 6,066,950  | 6,066,950  | 6,066,950  | 6,066,950  | 5,879,656  | 6,066,950  | 6,066,950  | 6,066,950  | 6,066,950  | 6,066,950  |
| Annual Cash Flow                 | 11,407,634 | 10,989,598 | 11,267,193 | 11,267,193 | 11,267,193 | 11,267,193 | 10,919,361 | 11,267,193 | 11,267,193 | 11,267,193 | 11,267,193 | 11,267,193 |
| Discount Factor                  | 0.15       | 0.14       | 0.12       | 0.11       | 0.10       | 0.09       | 0.08       | 0.08       | 0.07       | 0.06       | 0.06       | 0.06       |
| Annual Present Value             | 1,695,672  | 1,485,031  | 1,384,129  | 1,258,299  | 1,143,909  | 1,039,917  | 916,194    | 859,435    | 781,305    | 710,277    | 645,707    | 645,707    |
| TPI + Interest                   |            |            |            |            |            |            |            |            |            |            |            | -480,934   |
| NPV                              |            |            |            |            |            |            |            |            |            |            |            |            |

**Table S15. Discounted cashflow sheet of bioethanol production in China**

| Year                        | -2         | -1          | 0           | 1           | 2           | 3           | 4           | 5           | 6           | 7           | 8           |
|-----------------------------|------------|-------------|-------------|-------------|-------------|-------------|-------------|-------------|-------------|-------------|-------------|
| Capital Investment          | 8,674,023  | 65,055,169  | 34,696,090  |             |             |             |             |             |             |             |             |
| Land                        | 1,848,000  |             |             |             |             |             |             |             |             |             |             |
| Working Capital             |            |             | 13,553,160  |             |             |             |             |             |             |             |             |
| Loan Payment                |            |             |             | 17,856,770  | 17,856,770  | 17,856,770  | 17,856,770  | 17,856,770  | 17,856,770  | 17,856,770  | 17,856,770  |
| Loan Interest Payment       | 910,772    | 7,741,565   | 11,384,655  | 11,384,655  | 10,931,606  | 10,446,845  | 9,928,150   | 9,373,147   | 8,779,293   | 8,143,870   | 7,463,967   |
| Loan Principal              | 13,011,034 | 110,593,787 | 162,637,922 | 156,165,807 | 149,240,644 | 141,830,719 | 133,902,100 | 125,418,477 | 116,341,001 | 106,628,102 | 96,235,299  |
| Ethanol                     |            |             |             | 63,621,369  | 72,710,136  | 72,710,136  | 72,710,136  | 72,710,136  | 72,710,136  | 72,710,136  | 72,710,136  |
| Other sales                 |            |             |             | 1,546,439   | 1,767,359   | 1,767,359   | 1,767,359   | 1,767,359   | 1,767,359   | 1,767,359   | 1,767,359   |
| Total Annual Sales          |            |             |             | 65,167,808  | 74,477,495  | 74,477,495  | 74,477,495  | 74,477,495  | 74,477,495  | 74,477,495  | 74,477,495  |
| Annual Manufacturing Cost   |            |             |             | 26,475,960  |             |             |             |             |             |             |             |
| Raw Material cost           |            |             |             | 13,684,049  | 14,596,318  | 14,596,318  | 14,596,318  | 14,596,318  | 14,596,318  | 14,596,318  | 14,596,318  |
| Utility cost                |            |             |             | 12,791,912  | 13,644,706  | 13,644,706  | 13,644,706  | 13,644,706  | 13,644,706  | 13,644,706  | 13,644,706  |
| Baghouse Bags               |            |             |             | 535,125     |             |             |             | 535,125     |             |             |             |
| Fixed Operating Costs       |            |             |             | 10,101,739  | 10,775,188  | 10,775,188  | 10,775,188  | 10,775,188  | 10,775,188  | 10,775,188  | 10,775,188  |
| Total Product Cost          |            |             |             | 37,112,825  | 39,016,213  | 39,016,213  | 39,016,213  | 39,016,213  | 39,551,338  | 39,016,213  | 39,016,213  |
| Annual Depreciation         |            |             |             |             |             |             |             |             |             |             |             |
| <u>General Plant</u>        |            |             |             | 14%         | 24%         | 17%         | 12%         | 9%          | 9%          | 9%          | 4%          |
| Depreciation Charge         |            |             |             | 31,194,393  | 53,460,510  | 38,179,841  | 27,265,078  | 19,493,767  | 19,471,937  | 19,493,767  | 9,735,969   |
| Remaining Value             |            |             |             | 187,100,870 | 133,640,360 | 95,460,518  | 68,195,440  | 48,701,673  | 29,229,736  | 9,735,969   | 0           |
| <u>Heat and Power Plant</u> |            |             |             | 3.75%       | 7.22%       | 6.68%       | 6.18%       | 5.71%       | 5.29%       | 4.89%       | 4.52%       |
| Depreciation Charge         |            |             |             | 1,978,798   | 3,809,318   | 3,523,315   | 3,259,476   | 3,014,632   | 2,788,786   | 2,579,297   | 2,386,166   |
| Remaining Value             |            |             |             | 50,789,143  | 46,979,825  | 43,456,510  | 40,197,034  | 37,182,402  | 34,393,616  | 31,814,319  | 29,428,153  |
| Net Revenue                 |            |             |             | -16,502,862 | -32,740,152 | -16,688,720 | -4,991,422  | 3,579,736   | 3,886,140   | 5,244,348   | 15,875,180  |
| Losses Forward              |            |             |             |             | -16,502,862 | -49,243,014 | -65,931,733 | -70,923,155 | -67,343,419 | -63,457,279 | -58,212,931 |
| Taxable Income              |            |             |             | -16,502,862 | -49,243,014 | -65,931,733 | -70,923,155 | -67,343,419 | -63,457,279 | -58,212,931 | -42,337,750 |
| Income Tax                  |            |             |             | 0           | 0           | 0           | 0           | 0           | 0           | 0           | 0           |
| Annual Cash Flow            |            |             |             | 10,198,214  | 17,604,513  | 17,604,513  | 17,604,513  | 17,604,513  | 17,069,387  | 17,604,513  | 17,604,513  |
| Discount Factor             | 1.21       | 1.10        | 1.00        | 0.91        | 0.83        | 0.75        | 0.68        | 0.62        | 0.56        | 0.51        | 0.47        |
| Annual Present Value        |            |             |             | 9,271,103   | 14,549,184  | 13,226,531  | 12,024,119  | 10,931,017  | 9,635,224   | 9,033,899   | 8,212,635   |
| TPI + Interest              | 13,833,682 | 80,076,407  | 59,633,905  |             |             |             |             |             |             |             |             |
| NPV                         |            |             | 0           |             |             |             |             |             |             |             |             |

**Table S15. Discounted cashflow sheet of bioethanol production in China (continued)**

| Year                      | 9           | 10          | 11         | 12         | 13         | 14         | 15         | 16         | 17         | 18         | 19         |
|---------------------------|-------------|-------------|------------|------------|------------|------------|------------|------------|------------|------------|------------|
| Capital Investment        |             |             |            |            |            |            |            |            |            |            |            |
| Land                      |             |             |            |            |            |            |            |            |            |            |            |
| Working Capital           |             |             |            |            |            |            |            |            |            |            |            |
| Loan Payment              | 17,856,770  | 17,856,770  | 17,856,770 | 17,856,770 | 17,856,770 | 17,856,770 | 17,856,770 | 0          | 0          | 0          | 0          |
| Loan Interest Payment     | 6,736,471   | 5,958,050   | 5,125,140  | 4,233,926  | 3,280,326  | 2,259,975  | 1,168,200  | 0          | 0          | 0          | 0          |
| Loan Principal            | 85,115,001  | 73,216,281  | 60,484,651 | 46,861,807 | 32,285,364 | 16,688,570 | 0          | 0          | 0          | 0          | 0          |
| Ethanol                   | 72,710,136  | 72,710,136  | 72,710,136 | 72,710,136 | 72,710,136 | 72,710,136 | 72,710,136 | 72,710,136 | 72,710,136 | 72,710,136 | 72,710,136 |
| Other sales               | 1,767,359   | 1,767,359   | 1,767,359  | 1,767,359  | 1,767,359  | 1,767,359  | 1,767,359  | 1,767,359  | 1,767,359  | 1,767,359  | 1,767,359  |
| Total Annual Sales        | 74,477,495  | 74,477,495  | 74,477,495 | 74,477,495 | 74,477,495 | 74,477,495 | 74,477,495 | 74,477,495 | 74,477,495 | 74,477,495 | 74,477,495 |
| Annual Manufacturing Cost |             |             |            |            |            |            |            |            |            |            |            |
| Raw Material cost         | 14,596,318  | 14,596,318  | 14,596,318 | 14,596,318 | 14,596,318 | 14,596,318 | 14,596,318 | 14,596,318 | 14,596,318 | 14,596,318 | 14,596,318 |
| Utility cost              | 13,644,706  | 13,644,706  | 13,644,706 | 13,644,706 | 13,644,706 | 13,644,706 | 13,644,706 | 13,644,706 | 13,644,706 | 13,644,706 | 13,644,706 |
| Baghouse Bags             |             |             | 535,125    |            |            |            |            | 535,125    |            |            |            |
| Fixed Operating Costs     | 10,775,188  | 10,775,188  | 10,775,188 | 10,775,188 | 10,775,188 | 10,775,188 | 10,775,188 | 10,775,188 | 10,775,188 | 10,775,188 | 10,775,188 |
| Total Product Cost        | 39,016,213  | 39,016,213  | 39,551,338 | 39,016,213 | 39,016,213 | 39,016,213 | 39,016,213 | 39,551,338 | 39,016,213 | 39,016,213 | 39,016,213 |
| Annual Depreciation       |             |             |            |            |            |            |            |            |            |            |            |
| General Plant             |             |             |            |            |            |            |            |            |            |            |            |
| Depreciation Charge       |             |             |            |            |            |            |            |            |            |            |            |
| Remaining Value           |             |             |            |            |            |            |            |            |            |            |            |
| Heat and Power Plant      | 4.46%       | 4.46%       | 4.46%      | 4.46%      | 4.46%      | 4.46%      | 4.46%      | 4.46%      | 4.46%      | 4.46%      | 4.46%      |
| Depreciation Charge       | 2,354,506   | 2,353,978   | 2,354,506  | 2,353,978  | 2,354,506  | 2,353,978  | 2,354,506  | 2,353,978  | 2,354,506  | 2,353,978  | 2,354,506  |
| Remaining Value           | 27,073,647  | 24,719,669  | 22,365,164 | 20,011,186 | 17,656,681 | 15,302,703 | 12,948,197 | 10,594,219 | 8,239,714  | 5,885,736  | 3,531,231  |
| Net Revenue               | 26,370,306  | 27,149,254  | 27,446,512 | 28,873,379 | 29,826,450 | 30,847,329 | 31,938,577 | 32,572,179 | 33,106,777 | 33,107,304 | 33,106,777 |
| Losses Forward            | -42,337,750 | -15,967,445 | 0          | 0          | 0          | 0          | 0          | 0          | 0          | 0          | 0          |
| Taxable Income            | -15,967,445 | 11,181,810  | 27,446,512 | 28,873,379 | 29,826,450 | 30,847,329 | 31,938,577 | 32,572,179 | 33,106,777 | 33,107,304 | 33,106,777 |
| Income Tax                | 0           | 3,913,633   | 9,606,279  | 10,105,683 | 10,439,258 | 10,796,565 | 11,178,502 | 11,400,263 | 11,587,372 | 11,587,557 | 11,587,372 |
| Annual Cash Flow          | 17,604,513  | 13,690,879  | 7,463,108  | 7,498,830  | 7,165,255  | 6,807,948  | 6,426,011  | 23,525,894 | 23,873,910 | 23,873,726 | 23,873,910 |
| Discount Factor           | 0.42        | 0.39        | 0.35       | 0.32       | 0.29       | 0.26       | 0.24       | 0.22       | 0.20       | 0.18       | 0.16       |
| Annual Present Value      | 7,466,032   | 5,278,427   | 2,615,774  | 2,389,358  | 2,075,519  | 1,792,745  | 1,538,336  | 5,119,920  | 4,723,326  | 4,293,899  | 3,903,575  |
| TPI + Interest            |             |             |            |            |            |            |            |            |            |            |            |
| NPV                       |             |             |            |            |            |            |            |            |            |            |            |



**Table S15. Discounted cashflow sheet of bioethanol production in China (continued)**

| Year                        | 20         | 21         | 22         | 23         | 24         | 25         | 26         | 27         | 28         | 29         | 30          |
|-----------------------------|------------|------------|------------|------------|------------|------------|------------|------------|------------|------------|-------------|
| Capital Investment          |            |            |            |            |            |            |            |            |            |            |             |
| Land                        |            |            |            |            |            |            |            |            |            |            | -1,848,000  |
| Working Capital             |            |            |            |            |            |            |            |            |            |            | -13,553,160 |
| Loan Payment                | 0          | 0          | 0          | 0          | 0          | 0          | 0          | 0          | 0          | 0          | 0           |
| Loan Interest Payment       | 0          | 0          | 0          | 0          | 0          | 0          | 0          | 0          | 0          | 0          | 0           |
| Loan Principal              | 0          | 0          | 0          | 0          | 0          | 0          | 0          | 0          | 0          | 0          | 0           |
| Ethanol                     | 72,710,136 | 72,710,136 | 72,710,136 | 72,710,136 | 72,710,136 | 72,710,136 | 72,710,136 | 72,710,136 | 72,710,136 | 72,710,136 | 72,710,136  |
| Other sales                 | 1,767,359  | 1,767,359  | 1,767,359  | 1,767,359  | 1,767,359  | 1,767,359  | 1,767,359  | 1,767,359  | 1,767,359  | 1,767,359  | 1,767,359   |
| Total Annual Sales          | 74,477,495 | 74,477,495 | 74,477,495 | 74,477,495 | 74,477,495 | 74,477,495 | 74,477,495 | 74,477,495 | 74,477,495 | 74,477,495 | 74,477,495  |
| Annual Manufacturing Cost   |            |            |            |            |            |            |            |            |            |            |             |
| Raw Material cost           | 14,596,318 | 14,596,318 | 14,596,318 | 14,596,318 | 14,596,318 | 14,596,318 | 14,596,318 | 14,596,318 | 14,596,318 | 14,596,318 | 14,596,318  |
| Utility cost                | 13,644,706 | 13,644,706 | 13,644,706 | 13,644,706 | 13,644,706 | 13,644,706 | 13,644,706 | 13,644,706 | 13,644,706 | 13,644,706 | 13,644,706  |
| Baghouse Bags               |            | 535,125    |            |            |            |            | 535,125    |            |            |            |             |
| Fixed Operating Costs       | 10,775,188 | 10,775,188 | 10,775,188 | 10,775,188 | 10,775,188 | 10,775,188 | 10,775,188 | 10,775,188 | 10,775,188 | 10,775,188 | 10,775,188  |
| Total Product Cost          | 39,016,213 | 39,551,338 | 39,016,213 | 39,016,213 | 39,016,213 | 39,016,213 | 39,551,338 | 39,016,213 | 39,016,213 | 39,016,213 | 39,016,213  |
| Annual Depreciation         |            |            |            |            |            |            |            |            |            |            |             |
| <u>General Plant</u>        |            |            |            |            |            |            |            |            |            |            |             |
| Depreciation Charge         |            |            |            |            |            |            |            |            |            |            |             |
| Remaining Value             |            |            |            |            |            |            |            |            |            |            |             |
| <u>Heat and Power Plant</u> | 4.46%      | 2.23%      |            |            |            |            |            |            |            |            |             |
| Depreciation Charge         | 2,353,978  | 1,177,253  |            |            |            |            |            |            |            |            |             |
| Remaining Value             | 1,177,253  | 0          |            |            |            |            |            |            |            |            |             |
| Net Revenue                 | 33,107,304 | 33,748,904 | 35,461,282 | 35,461,282 | 35,461,282 | 35,461,282 | 34,926,157 | 35,461,282 | 35,461,282 | 35,461,282 | 35,461,282  |
| Losses Forward              | 0          | 0          | 0          | 0          | 0          | 0          | 0          | 0          | 0          | 0          | 0           |
| Taxable Income              | 33,107,304 | 33,748,904 | 35,461,282 | 35,461,282 | 35,461,282 | 35,461,282 | 34,926,157 | 35,461,282 | 35,461,282 | 35,461,282 | 35,461,282  |
| Income Tax                  | 11,587,557 | 11,812,116 | 12,411,449 | 12,411,449 | 12,411,449 | 12,411,449 | 12,224,155 | 12,411,449 | 12,411,449 | 12,411,449 | 12,411,449  |
| Annual Cash Flow            | 23,873,726 | 23,114,040 | 23,049,834 | 23,049,834 | 23,049,834 | 23,049,834 | 22,702,002 | 23,049,834 | 23,049,834 | 23,049,834 | 23,049,834  |
| Discount Factor             | 0.15       | 0.14       | 0.12       | 0.11       | 0.10       | 0.09       | 0.08       | 0.08       | 0.07       | 0.06       | 0.06        |
| Annual Present Value        | 3,548,677  | 3,123,413  | 2,831,579  | 2,574,163  | 2,340,148  | 2,127,407  | 1,904,822  | 1,758,188  | 1,598,353  | 1,453,048  | 1,320,953   |
| TPI + Interest              |            |            |            |            |            |            |            |            |            |            | -882,618    |
| NPV                         |            |            |            |            |            |            |            |            |            |            |             |

**Table S16. Discounted cashflow sheet of bioethanol production in India**

| Year                        | -2         | -1          | 0           | 1           | 2           | 3           | 4           | 5           | 6           | 7           | 8           |
|-----------------------------|------------|-------------|-------------|-------------|-------------|-------------|-------------|-------------|-------------|-------------|-------------|
| Capital Investment          | 9,232,894  | 69,246,702  | 36,931,575  |             |             |             |             |             |             |             |             |
| Land                        | 1,848,000  |             |             |             |             |             |             |             |             |             |             |
| Working Capital             |            |             | 14,426,396  |             |             |             |             |             |             |             |             |
| Loan Payment                |            |             |             | 19,007,289  | 19,007,289  | 19,007,289  | 19,007,289  | 19,007,289  | 19,007,289  | 19,007,289  | 19,007,289  |
| Loan Interest Payment       | 969,454    | 8,240,358   | 12,118,173  | 12,118,173  | 11,635,935  | 11,119,940  | 10,567,826  | 9,977,063   | 9,344,947   | 8,668,583   | 7,944,874   |
| Loan Principal              | 13,849,340 | 117,719,394 | 173,116,756 | 166,227,640 | 158,856,285 | 150,968,936 | 142,529,472 | 133,499,246 | 123,836,904 | 113,498,198 | 102,435,782 |
| Ethanol                     |            |             |             | 66,525,167  | 76,028,762  | 76,028,762  | 76,028,762  | 76,028,762  | 76,028,762  | 76,028,762  | 76,028,762  |
| Other sales                 |            |             |             | 42,324      | 48,370      | 48,370      | 48,370      | 48,370      | 48,370      | 48,370      | 48,370      |
| Total Annual Sales          |            |             |             | 66,567,491  | 76,077,133  | 76,077,133  | 76,077,133  | 76,077,133  | 76,077,133  | 76,077,133  | 76,077,133  |
| Annual Manufacturing Cost   |            |             |             | 25,563,660  |             |             |             |             |             |             |             |
| Raw Material cost           |            |             |             | 13,709,320  | 14,623,275  | 14,623,275  | 14,623,275  | 14,623,275  | 14,623,275  | 14,623,275  | 14,623,275  |
| Utility cost                |            |             |             | 11,854,339  | 12,644,629  | 12,644,629  | 12,644,629  | 12,644,629  | 12,644,629  | 12,644,629  | 12,644,629  |
| Baghouse Bags               |            |             |             | 535,125     |             |             |             | 535,125     |             |             |             |
| Fixed Operating Costs       |            |             |             | 10,417,480  | 11,111,979  | 11,111,979  | 11,111,979  | 11,111,979  | 11,111,979  | 11,111,979  | 11,111,979  |
| Total Product Cost          |            |             |             | 36,516,265  | 38,379,882  | 38,379,882  | 38,379,882  | 38,379,882  | 38,915,008  | 38,379,882  | 38,379,882  |
| Annual Depreciation         |            |             |             |             |             |             |             |             |             |             |             |
| <u>General Plant</u>        |            |             |             | 14%         | 24%         | 17%         | 12%         | 9%          | 9%          | 9%          | 4%          |
| Depreciation Charge         |            |             |             | 33,117,460  | 56,756,235  | 40,533,546  | 28,945,912  | 20,695,516  | 20,672,340  | 20,695,516  | 10,336,170  |
| Remaining Value             |            |             |             | 198,635,235 | 141,879,000 | 101,345,454 | 72,399,542  | 51,704,026  | 31,031,686  | 10,336,170  | 0           |
| <u>Heat and Power Plant</u> |            |             |             | 3.75%       | 7.22%       | 6.68%       | 6.18%       | 5.71%       | 5.29%       | 4.89%       | 4.52%       |
| Depreciation Charge         |            |             |             | 2,129,071   | 4,098,604   | 3,790,882   | 3,507,006   | 3,243,569   | 3,000,571   | 2,775,173   | 2,567,376   |
| Remaining Value             |            |             |             | 54,646,160  | 50,547,556  | 46,756,674  | 43,249,668  | 40,006,099  | 37,005,528  | 34,230,355  | 31,662,979  |
| Net Revenue                 |            |             |             | -17,313,478 | -34,793,523 | -17,747,118 | -5,323,493  | 3,781,103   | 4,144,266   | 5,557,978   | 16,848,830  |
| Losses Forward              |            |             |             |             | -17,313,478 | -52,107,002 | -69,854,120 | -75,177,613 | -71,396,510 | -67,252,244 | -61,694,265 |
| Taxable Income              |            |             |             | -17,313,478 | -52,107,002 | -69,854,120 | -75,177,613 | -71,396,510 | -67,252,244 | -61,694,265 | -44,845,435 |
| Income Tax                  |            |             |             | 0           | 0           | 0           | 0           | 0           | 0           | 0           | 0           |
| Annual Cash Flow            |            |             |             | 11,043,937  | 18,689,961  | 18,689,961  | 18,689,961  | 18,689,961  | 18,154,836  | 18,689,961  | 18,689,961  |
| Discount Factor             | 1.21       | 1.10        | 1.00        | 0.91        | 0.83        | 0.75        | 0.68        | 0.62        | 0.56        | 0.51        | 0.47        |
| Annual Present Value        |            |             |             | 10,039,942  | 15,446,249  | 14,042,044  | 12,765,495  | 11,604,995  | 10,247,931  | 9,590,905   | 8,719,005   |
| TPI + Interest              | 14,580,920 | 85,235,766  | 63,476,144  |             |             |             |             |             |             |             |             |
| NPV                         |            |             | 0           |             |             |             |             |             |             |             |             |

**Table S16. Discounted cashflow sheet of bioethanol production in India (continued)**

| Year                      | 9           | 10          | 11         | 12         | 13         | 14         | 15         | 16         | 17         | 18         | 19         |
|---------------------------|-------------|-------------|------------|------------|------------|------------|------------|------------|------------|------------|------------|
| Capital Investment        |             |             |            |            |            |            |            |            |            |            |            |
| Land                      |             |             |            |            |            |            |            |            |            |            |            |
| Working Capital           |             |             |            |            |            |            |            |            |            |            |            |
| Loan Payment              | 19,007,289  | 19,007,289  | 19,007,289 | 19,007,289 | 19,007,289 | 19,007,289 | 19,007,289 | 0          | 0          | 0          | 0          |
| Loan Interest Payment     | 7,170,505   | 6,341,930   | 5,455,355  | 4,506,719  | 3,491,679  | 2,405,587  | 1,243,468  | 0          | 0          | 0          | 0          |
| Loan Principal            | 90,598,998  | 77,933,639  | 64,381,704 | 49,881,134 | 34,365,524 | 17,763,822 | 0          | 0          | 0          | 0          | 0          |
| Ethanol                   | 76,028,762  | 76,028,762  | 76,028,762 | 76,028,762 | 76,028,762 | 76,028,762 | 76,028,762 | 76,028,762 | 76,028,762 | 76,028,762 | 76,028,762 |
| Other sales               | 48,370      | 48,370      | 48,370     | 48,370     | 48,370     | 48,370     | 48,370     | 48,370     | 48,370     | 48,370     | 48,370     |
| Total Annual Sales        | 76,077,133  | 76,077,133  | 76,077,133 | 76,077,133 | 76,077,133 | 76,077,133 | 76,077,133 | 76,077,133 | 76,077,133 | 76,077,133 | 76,077,133 |
| Annual Manufacturing Cost |             |             |            |            |            |            |            |            |            |            |            |
| Raw Material cost         | 14,623,275  | 14,623,275  | 14,623,275 | 14,623,275 | 14,623,275 | 14,623,275 | 14,623,275 | 14,623,275 | 14,623,275 | 14,623,275 | 14,623,275 |
| Utility cost              | 12,644,629  | 12,644,629  | 12,644,629 | 12,644,629 | 12,644,629 | 12,644,629 | 12,644,629 | 12,644,629 | 12,644,629 | 12,644,629 | 12,644,629 |
| Baghouse Bags             |             |             | 535,125    |            |            |            |            | 535,125    |            |            |            |
| Fixed Operating Costs     | 11,111,979  | 11,111,979  | 11,111,979 | 11,111,979 | 11,111,979 | 11,111,979 | 11,111,979 | 11,111,979 | 11,111,979 | 11,111,979 | 11,111,979 |
| Total Product Cost        | 38,379,882  | 38,379,882  | 38,915,008 | 38,379,882 | 38,379,882 | 38,379,882 | 38,379,882 | 38,915,008 | 38,379,882 | 38,379,882 | 38,379,882 |
| Annual Depreciation       |             |             |            |            |            |            |            |            |            |            |            |
| General Plant             |             |             |            |            |            |            |            |            |            |            |            |
| Depreciation Charge       |             |             |            |            |            |            |            |            |            |            |            |
| Remaining Value           |             |             |            |            |            |            |            |            |            |            |            |
| Heat and Power Plant      | 4.46%       | 4.46%       | 4.46%      | 4.46%      | 4.46%      | 4.46%      | 4.46%      | 4.46%      | 4.46%      | 4.46%      | 4.46%      |
| Depreciation Charge       | 2,533,311   | 2,532,743   | 2,533,311  | 2,532,743  | 2,533,311  | 2,532,743  | 2,533,311  | 2,532,743  | 2,533,311  | 2,532,743  | 2,533,311  |
| Remaining Value           | 29,129,668  | 26,596,925  | 24,063,614 | 21,530,871 | 18,997,560 | 16,464,817 | 13,931,506 | 11,398,763 | 8,865,452  | 6,332,709  | 3,799,398  |
| Net Revenue               | 27,993,435  | 28,822,577  | 29,173,459 | 30,657,788 | 31,672,260 | 32,758,921 | 33,920,472 | 34,629,382 | 35,163,940 | 35,164,507 | 35,163,940 |
| Losses Forward            | -44,845,435 | -16,852,000 | 0          | 0          | 0          | 0          | 0          | 0          | 0          | 0          | 0          |
| Taxable Income            | -16,852,000 | 11,970,577  | 29,173,459 | 30,657,788 | 31,672,260 | 32,758,921 | 33,920,472 | 34,629,382 | 35,163,940 | 35,164,507 | 35,163,940 |
| Income Tax                | 0           | 4,189,702   | 10,210,711 | 10,730,226 | 11,085,291 | 11,465,622 | 11,872,165 | 12,120,284 | 12,307,379 | 12,307,578 | 12,307,379 |
| Annual Cash Flow          | 18,689,961  | 14,500,259  | 7,944,125  | 7,959,735  | 7,604,670  | 7,224,339  | 6,817,796  | 25,041,841 | 25,389,872 | 25,389,673 | 25,389,872 |
| Discount Factor           | 0.42        | 0.39        | 0.35       | 0.32       | 0.29       | 0.26       | 0.24       | 0.22       | 0.20       | 0.18       | 0.16       |
| Annual Present Value      | 7,926,368   | 5,590,478   | 2,784,367  | 2,536,217  | 2,202,802  | 1,902,394  | 1,632,126  | 5,449,834  | 5,023,251  | 4,566,556  | 4,151,447  |
| TPI + Interest            |             |             |            |            |            |            |            |            |            |            |            |
| NPV                       |             |             |            |            |            |            |            |            |            |            |            |

**Table S16. Discounted cashflow sheet of bioethanol production in India (continued)**

| Year                        | 20         | 21         | 22         | 23         | 24         | 25         | 26         | 27         | 28         | 29         | 30          |
|-----------------------------|------------|------------|------------|------------|------------|------------|------------|------------|------------|------------|-------------|
| Capital Investment          |            |            |            |            |            |            |            |            |            |            |             |
| Land                        |            |            |            |            |            |            |            |            |            |            | -1,848,000  |
| Working Capital             |            |            |            |            |            |            |            |            |            |            | -14,426,396 |
| Loan Payment                | 0          | 0          | 0          | 0          | 0          | 0          | 0          | 0          | 0          | 0          | 0           |
| Loan Interest Payment       | 0          | 0          | 0          | 0          | 0          | 0          | 0          | 0          | 0          | 0          | 0           |
| Loan Principal              | 0          | 0          | 0          | 0          | 0          | 0          | 0          | 0          | 0          | 0          | 0           |
| Ethanol                     | 76,028,762 | 76,028,762 | 76,028,762 | 76,028,762 | 76,028,762 | 76,028,762 | 76,028,762 | 76,028,762 | 76,028,762 | 76,028,762 | 76,028,762  |
| Other sales                 | 48,370     | 48,370     | 48,370     | 48,370     | 48,370     | 48,370     | 48,370     | 48,370     | 48,370     | 48,370     | 48,370      |
| Total Annual Sales          | 76,077,133 | 76,077,133 | 76,077,133 | 76,077,133 | 76,077,133 | 76,077,133 | 76,077,133 | 76,077,133 | 76,077,133 | 76,077,133 | 76,077,133  |
| Annual Manufacturing Cost   |            |            |            |            |            |            |            |            |            |            |             |
| Raw Material cost           | 14,623,275 | 14,623,275 | 14,623,275 | 14,623,275 | 14,623,275 | 14,623,275 | 14,623,275 | 14,623,275 | 14,623,275 | 14,623,275 | 14,623,275  |
| Utility cost                | 12,644,629 | 12,644,629 | 12,644,629 | 12,644,629 | 12,644,629 | 12,644,629 | 12,644,629 | 12,644,629 | 12,644,629 | 12,644,629 | 12,644,629  |
| Baghouse Bags               |            | 535,125    |            |            |            |            | 535,125    |            |            |            |             |
| Fixed Operating Costs       | 11,111,979 | 11,111,979 | 11,111,979 | 11,111,979 | 11,111,979 | 11,111,979 | 11,111,979 | 11,111,979 | 11,111,979 | 11,111,979 | 11,111,979  |
| Total Product Cost          | 38,379,882 | 38,915,008 | 38,379,882 | 38,379,882 | 38,379,882 | 38,379,882 | 38,915,008 | 38,379,882 | 38,379,882 | 38,379,882 | 38,379,882  |
| Annual Depreciation         |            |            |            |            |            |            |            |            |            |            |             |
| <u>General Plant</u>        |            |            |            |            |            |            |            |            |            |            |             |
| Depreciation Charge         |            |            |            |            |            |            |            |            |            |            |             |
| Remaining Value             |            |            |            |            |            |            |            |            |            |            |             |
| <u>Heat and Power Plant</u> | 4.46%      | 2.23%      |            |            |            |            |            |            |            |            |             |
| Depreciation Charge         | 2,532,743  | 1,266,655  |            |            |            |            |            |            |            |            |             |
| Remaining Value             | 1,266,655  | 0          |            |            |            |            |            |            |            |            |             |
| Net Revenue                 | 35,164,507 | 35,895,470 | 37,697,250 | 37,697,250 | 37,697,250 | 37,697,250 | 37,162,125 | 37,697,250 | 37,697,250 | 37,697,250 | 37,697,250  |
| Losses Forward              | 0          | 0          | 0          | 0          | 0          | 0          | 0          | 0          | 0          | 0          | 0           |
| Taxable Income              | 35,164,507 | 35,895,470 | 37,697,250 | 37,697,250 | 37,697,250 | 37,697,250 | 37,162,125 | 37,697,250 | 37,697,250 | 37,697,250 | 37,697,250  |
| Income Tax                  | 12,307,578 | 12,563,414 | 13,194,038 | 13,194,038 | 13,194,038 | 13,194,038 | 13,006,744 | 13,194,038 | 13,194,038 | 13,194,038 | 13,194,038  |
| Annual Cash Flow            | 25,389,673 | 24,598,711 | 24,503,213 | 24,503,213 | 24,503,213 | 24,503,213 | 24,155,381 | 24,503,213 | 24,503,213 | 24,503,213 | 24,503,213  |
| Discount Factor             | 0.15       | 0.14       | 0.12       | 0.11       | 0.10       | 0.09       | 0.08       | 0.08       | 0.07       | 0.06       | 0.06        |
| Annual Present Value        | 3,774,013  | 3,324,038  | 3,010,121  | 2,736,474  | 2,487,703  | 2,261,548  | 2,026,768  | 1,869,048  | 1,699,135  | 1,544,668  | 1,404,244   |
| TPI + Interest              |            |            |            |            |            |            |            |            |            |            | -932,662    |
| NPV                         |            |            |            |            |            |            |            |            |            |            |             |

**Table S17. Discounted cashflow sheet of bioethanol production in USA**

| Year                        | -2         | -1          | 0           | 1           | 2           | 3           | 4           | 5           | 6           | 7           | 8           |
|-----------------------------|------------|-------------|-------------|-------------|-------------|-------------|-------------|-------------|-------------|-------------|-------------|
| Capital Investment          | 9,622,447  | 72,168,355  | 38,489,790  |             |             |             |             |             |             |             |             |
| Land                        | 1,848,000  |             |             |             |             |             |             |             |             |             |             |
| Working Capital             |            |             | 15,035,074  |             |             |             |             |             |             |             |             |
| Loan Payment                |            |             |             | 19,809,244  | 19,809,244  | 19,809,244  | 19,809,244  | 19,809,244  | 19,809,244  | 19,809,244  | 19,809,244  |
| Loan Interest Payment       | 1,010,357  | 8,588,034   | 12,629,462  | 12,629,462  | 12,126,877  | 11,589,112  | 11,013,703  | 10,398,015  | 9,739,229   | 9,034,328   | 8,280,084   |
| Loan Principal              | 14,433,671 | 122,686,204 | 180,420,889 | 173,241,107 | 165,558,741 | 157,338,609 | 148,543,068 | 139,131,839 | 129,061,824 | 118,286,908 | 106,757,747 |
| Ethanol                     |            |             |             | 66,946,605  | 76,510,406  | 76,510,406  | 76,510,406  | 76,510,406  | 76,510,406  | 76,510,406  | 76,510,406  |
| Other sales                 |            |             |             | 51,915      | 59,331      | 59,331      | 59,331      | 59,331      | 59,331      | 59,331      | 59,331      |
| Total Annual Sales          |            |             |             | 66,998,520  | 76,569,737  | 76,569,737  | 76,569,737  | 76,569,737  | 76,569,737  | 76,569,737  | 76,569,737  |
| Annual Manufacturing Cost   |            |             |             | 24,356,730  |             |             |             |             |             |             |             |
| Raw Material cost           |            |             |             | 13,710,326  | 14,624,348  | 14,624,348  | 14,624,348  | 14,624,348  | 14,624,348  | 14,624,348  | 14,624,348  |
| Utility cost                |            |             |             | 10,646,404  | 11,356,164  | 11,356,164  | 11,356,164  | 11,356,164  | 11,356,164  | 11,356,164  | 11,356,164  |
| Baghouse Bags               |            |             |             | 535,125     |             |             |             | 535,125     |             |             |             |
| Fixed Operating Costs       |            |             |             | 10,626,720  | 11,335,168  | 11,335,168  | 11,335,168  | 11,335,168  | 11,335,168  | 11,335,168  | 11,335,168  |
| Total Product Cost          |            |             |             | 35,518,576  | 37,315,681  | 37,315,681  | 37,315,681  | 37,315,681  | 37,850,806  | 37,315,681  | 37,315,681  |
| Annual Depreciation         |            |             |             |             |             |             |             |             |             |             |             |
| <u>General Plant</u>        |            |             |             | 14%         | 24%         | 17%         | 12%         | 9%          | 9%          | 9%          | 4%          |
| Depreciation Charge         |            |             |             | 34,355,131  | 58,877,338  | 42,048,373  | 30,027,683  | 21,468,952  | 21,444,910  | 21,468,952  | 10,722,455  |
| Remaining Value             |            |             |             | 206,058,663 | 147,181,325 | 105,132,952 | 75,105,269  | 53,636,317  | 32,191,407  | 10,722,455  | 0           |
| <u>Heat and Power Plant</u> |            |             |             | 3.75%       | 7.22%       | 6.68%       | 6.18%       | 5.71%       | 5.29%       | 4.89%       | 4.52%       |
| Depreciation Charge         |            |             |             | 2,260,788   | 4,352,168   | 4,025,409   | 3,723,970   | 3,444,236   | 3,186,204   | 2,946,862   | 2,726,209   |
| Remaining Value             |            |             |             | 58,026,899  | 53,674,731  | 49,649,322  | 45,925,351  | 42,481,116  | 39,294,912  | 36,348,049  | 33,621,840  |
| Net Revenue                 |            |             |             | -17,765,438 | -36,102,328 | -18,408,837 | -5,511,300  | 3,942,854   | 4,348,587   | 5,803,915   | 17,525,308  |
| Losses Forward              |            |             |             |             | -17,765,438 | -53,867,766 | -72,276,603 | -77,787,902 | -73,845,048 | -69,496,461 | -63,692,547 |
| Taxable Income              |            |             |             | -17,765,438 | -53,867,766 | -72,276,603 | -77,787,902 | -73,845,048 | -69,496,461 | -63,692,547 | -46,167,238 |
| Income Tax                  |            |             |             | 0           | 0           | 0           | 0           | 0           | 0           | 0           | 0           |
| Annual Cash Flow            |            |             |             | 11,670,700  | 19,444,812  | 19,444,812  | 19,444,812  | 19,444,812  | 18,909,687  | 19,444,812  | 19,444,812  |
| Discount Factor             | 1.21       | 1.10        | 1.00        | 0.91        | 0.83        | 0.75        | 0.68        | 0.62        | 0.56        | 0.51        | 0.47        |
| Annual Present Value        |            |             |             | 10,609,727  | 16,070,093  | 14,609,175  | 13,281,069  | 12,073,699  | 10,674,025  | 9,978,263   | 9,071,148   |
| TPI + Interest              | 15,101,773 | 88,832,029  | 66,154,326  |             |             |             |             |             |             |             |             |
| NPV                         |            |             | 0           |             |             |             |             |             |             |             |             |

**Table S17. Discounted cashflow sheet of bioethanol production in USA (continued)**

| Year                        | 9           | 10          | 11         | 12         | 13         | 14         | 15         | 16         | 17         | 18         | 19         |
|-----------------------------|-------------|-------------|------------|------------|------------|------------|------------|------------|------------|------------|------------|
| Capital Investment          |             |             |            |            |            |            |            |            |            |            |            |
| Land                        |             |             |            |            |            |            |            |            |            |            |            |
| Working Capital             |             |             |            |            |            |            |            |            |            |            |            |
| Loan Payment                | 19,809,244  | 19,809,244  | 19,809,244 | 19,809,244 | 19,809,244 | 19,809,244 | 19,809,244 | 0          | 0          | 0          | 0          |
| Loan Interest Payment       | 7,473,042   | 6,609,508   | 5,685,527  | 4,696,867  | 3,639,000  | 2,507,083  | 1,295,932  | 0          | 0          | 0          | 0          |
| Loan Principal              | 94,421,546  | 81,221,810  | 67,098,093 | 51,985,716 | 35,815,473 | 18,513,312 | 0          | 0          | 0          | 0          | 0          |
| Ethanol                     | 76,510,406  | 76,510,406  | 76,510,406 | 76,510,406 | 76,510,406 | 76,510,406 | 76,510,406 | 76,510,406 | 76,510,406 | 76,510,406 | 76,510,406 |
| Other sales                 | 59,331      | 59,331      | 59,331     | 59,331     | 59,331     | 59,331     | 59,331     | 59,331     | 59,331     | 59,331     | 59,331     |
| Total Annual Sales          | 76,569,737  | 76,569,737  | 76,569,737 | 76,569,737 | 76,569,737 | 76,569,737 | 76,569,737 | 76,569,737 | 76,569,737 | 76,569,737 | 76,569,737 |
| Annual Manufacturing Cost   |             |             |            |            |            |            |            |            |            |            |            |
| Raw Material cost           | 14,624,348  | 14,624,348  | 14,624,348 | 14,624,348 | 14,624,348 | 14,624,348 | 14,624,348 | 14,624,348 | 14,624,348 | 14,624,348 | 14,624,348 |
| Utility cost                | 11,356,164  | 11,356,164  | 11,356,164 | 11,356,164 | 11,356,164 | 11,356,164 | 11,356,164 | 11,356,164 | 11,356,164 | 11,356,164 | 11,356,164 |
| Baghouse Bags               |             |             | 535,125    |            |            |            |            | 535,125    |            |            |            |
| Fixed Operating Costs       | 11,335,168  | 11,335,168  | 11,335,168 | 11,335,168 | 11,335,168 | 11,335,168 | 11,335,168 | 11,335,168 | 11,335,168 | 11,335,168 | 11,335,168 |
| Total Product Cost          | 37,315,681  | 37,315,681  | 37,850,806 | 37,315,681 | 37,315,681 | 37,315,681 | 37,315,681 | 37,850,806 | 37,315,681 | 37,315,681 | 37,315,681 |
| Annual Depreciation         |             |             |            |            |            |            |            |            |            |            |            |
| <u>General Plant</u>        |             |             |            |            |            |            |            |            |            |            |            |
| Depreciation Charge         |             |             |            |            |            |            |            |            |            |            |            |
| Remaining Value             |             |             |            |            |            |            |            |            |            |            |            |
| <u>Heat and Power Plant</u> | 4.46%       | 4.46%       | 4.46%      | 4.46%      | 4.46%      | 4.46%      | 4.46%      | 4.46%      | 4.46%      | 4.46%      | 4.46%      |
| Depreciation Charge         | 2,690,037   | 2,689,434   | 2,690,037  | 2,689,434  | 2,690,037  | 2,689,434  | 2,690,037  | 2,689,434  | 2,690,037  | 2,689,434  | 2,690,037  |
| Remaining Value             | 30,931,804  | 28,242,370  | 25,552,333 | 22,862,900 | 20,172,863 | 17,483,429 | 14,793,393 | 12,103,959 | 9,413,922  | 6,724,489  | 4,034,452  |
| Net Revenue                 | 29,090,977  | 29,955,114  | 30,343,367 | 31,867,756 | 32,925,019 | 34,057,539 | 35,268,088 | 36,029,497 | 36,564,020 | 36,564,622 | 36,564,020 |
| Losses Forward              | -46,167,238 | -17,076,261 | 0          | 0          | 0          | 0          | 0          | 0          | 0          | 0          | 0          |
| Taxable Income              | -17,076,261 | 12,878,853  | 30,343,367 | 31,867,756 | 32,925,019 | 34,057,539 | 35,268,088 | 36,029,497 | 36,564,020 | 36,564,622 | 36,564,020 |
| Income Tax                  | 0           | 4,507,599   | 10,620,179 | 11,153,715 | 11,523,757 | 11,920,139 | 12,343,831 | 12,610,324 | 12,797,407 | 12,797,618 | 12,797,407 |
| Annual Cash Flow            | 19,444,812  | 14,937,214  | 8,289,508  | 8,291,098  | 7,921,056  | 7,524,674  | 7,100,982  | 26,108,607 | 26,456,649 | 26,456,438 | 26,456,649 |
| Discount Factor             | 0.42        | 0.39        | 0.35       | 0.32       | 0.29       | 0.26       | 0.24       | 0.22       | 0.20       | 0.18       | 0.16       |
| Annual Present Value        | 8,246,499   | 5,758,943   | 2,905,422  | 2,641,799  | 2,294,448  | 1,981,482  | 1,699,919  | 5,681,994  | 5,234,307  | 4,758,423  | 4,325,874  |
| TPI + Interest              |             |             |            |            |            |            |            |            |            |            |            |
| NPV                         |             |             |            |            |            |            |            |            |            |            |            |

**Table S17. Discounted cashflow sheet of bioethanol production in USA (continued)**

| Year                        | 20         | 21         | 22         | 23         | 24         | 25         | 26         | 27         | 28         | 29         | 30          |
|-----------------------------|------------|------------|------------|------------|------------|------------|------------|------------|------------|------------|-------------|
| Capital Investment          |            |            |            |            |            |            |            |            |            |            |             |
| Land                        |            |            |            |            |            |            |            |            |            |            | -1,848,000  |
| Working Capital             |            |            |            |            |            |            |            |            |            |            | -15,035,074 |
| Loan Payment                | 0          | 0          | 0          | 0          | 0          | 0          | 0          | 0          | 0          | 0          | 0           |
| Loan Interest Payment       | 0          | 0          | 0          | 0          | 0          | 0          | 0          | 0          | 0          | 0          | 0           |
| Loan Principal              | 0          | 0          | 0          | 0          | 0          | 0          | 0          | 0          | 0          | 0          | 0           |
| Ethanol                     | 76,510,406 | 76,510,406 | 76,510,406 | 76,510,406 | 76,510,406 | 76,510,406 | 76,510,406 | 76,510,406 | 76,510,406 | 76,510,406 | 76,510,406  |
| Other sales                 | 59,331     | 59,331     | 59,331     | 59,331     | 59,331     | 59,331     | 59,331     | 59,331     | 59,331     | 59,331     | 59,331      |
| Total Annual Sales          | 76,569,737 | 76,569,737 | 76,569,737 | 76,569,737 | 76,569,737 | 76,569,737 | 76,569,737 | 76,569,737 | 76,569,737 | 76,569,737 | 76,569,737  |
| Annual Manufacturing Cost   |            |            |            |            |            |            |            |            |            |            |             |
| Raw Material cost           | 14,624,348 | 14,624,348 | 14,624,348 | 14,624,348 | 14,624,348 | 14,624,348 | 14,624,348 | 14,624,348 | 14,624,348 | 14,624,348 | 14,624,348  |
| Utility cost                | 11,356,164 | 11,356,164 | 11,356,164 | 11,356,164 | 11,356,164 | 11,356,164 | 11,356,164 | 11,356,164 | 11,356,164 | 11,356,164 | 11,356,164  |
| Baghouse Bags               |            | 535,125    |            |            |            |            | 535,125    |            |            |            |             |
| Fixed Operating Costs       | 11,335,168 | 11,335,168 | 11,335,168 | 11,335,168 | 11,335,168 | 11,335,168 | 11,335,168 | 11,335,168 | 11,335,168 | 11,335,168 | 11,335,168  |
| Total Product Cost          | 37,315,681 | 37,850,806 | 37,315,681 | 37,315,681 | 37,315,681 | 37,315,681 | 37,850,806 | 37,315,681 | 37,315,681 | 37,315,681 | 37,315,681  |
| Annual Depreciation         |            |            |            |            |            |            |            |            |            |            |             |
| <u>General Plant</u>        |            |            |            |            |            |            |            |            |            |            |             |
| Depreciation Charge         |            |            |            |            |            |            |            |            |            |            |             |
| Remaining Value             |            |            |            |            |            |            |            |            |            |            |             |
| <u>Heat and Power Plant</u> | 4.46%      | 2.23%      |            |            |            |            |            |            |            |            |             |
| Depreciation Charge         | 2,689,434  | 1,345,018  |            |            |            |            |            |            |            |            |             |
| Remaining Value             | 1,345,018  | 0          |            |            |            |            |            |            |            |            |             |
| Net Revenue                 | 36,564,622 | 37,373,912 | 39,254,056 | 39,254,056 | 39,254,056 | 39,254,056 | 38,718,931 | 39,254,056 | 39,254,056 | 39,254,056 | 39,254,056  |
| Losses Forward              | 0          | 0          | 0          | 0          | 0          | 0          | 0          | 0          | 0          | 0          | 0           |
| Taxable Income              | 36,564,622 | 37,373,912 | 39,254,056 | 39,254,056 | 39,254,056 | 39,254,056 | 38,718,931 | 39,254,056 | 39,254,056 | 39,254,056 | 39,254,056  |
| Income Tax                  | 12,797,618 | 13,080,869 | 13,738,920 | 13,738,920 | 13,738,920 | 13,738,920 | 13,551,626 | 13,738,920 | 13,738,920 | 13,738,920 | 13,738,920  |
| Annual Cash Flow            | 26,456,438 | 25,638,061 | 25,515,137 | 25,515,137 | 25,515,137 | 25,515,137 | 25,167,305 | 25,515,137 | 25,515,137 | 25,515,137 | 25,515,137  |
| Discount Factor             | 0.15       | 0.14       | 0.12       | 0.11       | 0.10       | 0.09       | 0.08       | 0.08       | 0.07       | 0.06       | 0.06        |
| Annual Present Value        | 3,932,581  | 3,464,486  | 3,134,432  | 2,849,483  | 2,590,439  | 2,354,945  | 2,111,674  | 1,946,236  | 1,769,305  | 1,608,459  | 1,462,236   |
| TPI + Interest              |            |            |            |            |            |            |            |            |            |            | -967,545    |
| NPV                         |            |            |            |            |            |            |            |            |            |            |             |

**Table S18. Discounted cashflow sheet of bioethanol production in Brazil**

| Year                        | -2         | -1          | 0           | 1           | 2           | 3           | 4           | 5           | 6           | 7           | 8           |
|-----------------------------|------------|-------------|-------------|-------------|-------------|-------------|-------------|-------------|-------------|-------------|-------------|
| Capital Investment          | 9,787,220  | 73,404,151  | 39,148,881  |             |             |             |             |             |             |             |             |
| Land                        | 1,848,000  |             |             |             |             |             |             |             |             |             |             |
| Working Capital             |            |             | 15,292,532  |             |             |             |             |             |             |             |             |
| Loan Payment                |            |             |             | 20,148,453  | 20,148,453  | 20,148,453  | 20,148,453  | 20,148,453  | 20,148,453  | 20,148,453  | 20,148,453  |
| Loan Interest Payment       | 1,027,658  | 8,735,094   | 12,845,727  | 12,845,727  | 12,334,536  | 11,787,561  | 11,202,299  | 10,576,068  | 9,906,001   | 9,189,030   | 8,421,870   |
| Loan Principal              | 14,680,830 | 124,787,058 | 183,510,379 | 176,207,652 | 168,393,735 | 160,032,843 | 151,086,689 | 141,514,304 | 131,271,852 | 120,312,428 | 108,585,845 |
| Ethanol                     |            |             |             | 67,245,243  | 76,851,707  | 76,851,707  | 76,851,707  | 76,851,707  | 76,851,707  | 76,851,707  | 76,851,707  |
| Other sales                 |            |             |             | 56,213      | 64,244      | 64,244      | 64,244      | 64,244      | 64,244      | 64,244      | 64,244      |
| Total Annual Sales          |            |             |             | 67,301,457  | 76,915,950  | 76,915,950  | 76,915,950  | 76,915,950  | 76,915,950  | 76,915,950  | 76,915,950  |
| Annual Manufacturing Cost   |            |             |             | 23,955,425  |             |             |             |             |             |             |             |
| Raw Material cost           |            |             |             | 13,709,042  | 14,622,978  | 14,622,978  | 14,622,978  | 14,622,978  | 14,622,978  | 14,622,978  | 14,622,978  |
| Utility cost                |            |             |             | 10,246,383  | 10,929,475  | 10,929,475  | 10,929,475  | 10,929,475  | 10,929,475  | 10,929,475  | 10,929,475  |
| Baghouse Bags               |            |             |             | 535,125     |             |             |             | 535,125     |             |             |             |
| Fixed Operating Costs       |            |             |             | 10,740,046  | 11,456,049  | 11,456,049  | 11,456,049  | 11,456,049  | 11,456,049  | 11,456,049  | 11,456,049  |
| Total Product Cost          |            |             |             | 35,230,597  | 37,008,502  | 37,008,502  | 37,008,502  | 37,008,502  | 37,543,628  | 37,008,502  | 37,008,502  |
| Annual Depreciation         |            |             |             |             |             |             |             |             |             |             |             |
| <u>General Plant</u>        |            |             |             | 14%         | 24%         | 17%         | 12%         | 9%          | 9%          | 9%          | 4%          |
| Depreciation Charge         |            |             |             | 35,115,896  | 60,181,126  | 42,979,497  | 30,692,620  | 21,944,363  | 21,919,789  | 21,944,363  | 10,959,895  |
| Remaining Value             |            |             |             | 210,621,654 | 150,440,528 | 107,461,030 | 76,768,410  | 54,824,047  | 32,904,258  | 10,959,895  | 0           |
| <u>Heat and Power Plant</u> |            |             |             | 3.75%       | 7.22%       | 6.68%       | 6.18%       | 5.71%       | 5.29%       | 4.89%       | 4.52%       |
| Depreciation Charge         |            |             |             | 2,254,241   | 4,339,563   | 4,013,750   | 3,713,185   | 3,434,260   | 3,176,976   | 2,938,327   | 2,718,314   |
| Remaining Value             |            |             |             | 57,858,841  | 53,519,278  | 49,505,527  | 45,792,342  | 42,358,082  | 39,181,105  | 36,242,778  | 33,524,464  |
| Net Revenue                 |            |             |             | -18,145,003 | -36,947,777 | -18,873,361 | -5,700,656  | 3,952,756   | 4,369,555   | 5,835,728   | 17,807,370  |
| Losses Forward              |            |             |             |             | -18,145,003 | -55,092,780 | -73,966,141 | -79,666,798 | -75,714,041 | -71,344,486 | -65,508,759 |
| Taxable Income              |            |             |             | -18,145,003 | -55,092,780 | -73,966,141 | -79,666,798 | -75,714,041 | -71,344,486 | -65,508,759 | -47,701,389 |
| Income Tax                  |            |             |             | 0           | 0           | 0           | 0           | 0           | 0           | 0           | 0           |
| Annual Cash Flow            |            |             |             | 11,922,407  | 19,758,995  | 19,758,995  | 19,758,995  | 19,758,995  | 19,223,869  | 19,758,995  | 19,758,995  |
| Discount Factor             | 1.21       | 1.10        | 1.00        | 0.91        | 0.83        | 0.75        | 0.68        | 0.62        | 0.56        | 0.51        | 0.47        |
| Annual Present Value        |            |             |             | 10,838,552  | 16,329,748  | 14,845,225  | 13,495,659  | 12,268,781  | 10,851,373  | 10,139,489  | 9,217,717   |
| TPI + Interest              | 15,322,083 | 90,353,170  | 67,287,139  |             |             |             |             |             |             |             |             |
| NPV                         |            |             | 0           |             |             |             |             |             |             |             |             |



**Table S18. Discounted cashflow sheet of bioethanol production in Brazil (continued)**

| Year                      | 9           | 10          | 11         | 12         | 13         | 14         | 15         | 16         | 17         | 18         | 19         |
|---------------------------|-------------|-------------|------------|------------|------------|------------|------------|------------|------------|------------|------------|
| Capital Investment        |             |             |            |            |            |            |            |            |            |            |            |
| Land                      |             |             |            |            |            |            |            |            |            |            |            |
| Working Capital           |             |             |            |            |            |            |            |            |            |            |            |
| Loan Payment              | 20,148,453  | 20,148,453  | 20,148,453 | 20,148,453 | 20,148,453 | 20,148,453 | 20,148,453 | 0          | 0          | 0          | 0          |
| Loan Interest Payment     | 7,601,009   | 6,722,688   | 5,782,885  | 4,777,295  | 3,701,314  | 2,550,014  | 1,318,123  | 0          | 0          | 0          | 0          |
| Loan Principal            | 96,038,401  | 82,612,636  | 68,247,067 | 52,875,909 | 36,428,769 | 18,830,330 | 0          | 0          | 0          | 0          | 0          |
| Ethanol                   | 76,851,707  | 76,851,707  | 76,851,707 | 76,851,707 | 76,851,707 | 76,851,707 | 76,851,707 | 76,851,707 | 76,851,707 | 76,851,707 | 76,851,707 |
| Other sales               | 64,244      | 64,244      | 64,244     | 64,244     | 64,244     | 64,244     | 64,244     | 64,244     | 64,244     | 64,244     | 64,244     |
| Total Annual Sales        | 76,915,950  | 76,915,950  | 76,915,950 | 76,915,950 | 76,915,950 | 76,915,950 | 76,915,950 | 76,915,950 | 76,915,950 | 76,915,950 | 76,915,950 |
| Annual Manufacturing Cost |             |             |            |            |            |            |            |            |            |            |            |
| Raw Material cost         | 14,622,978  | 14,622,978  | 14,622,978 | 14,622,978 | 14,622,978 | 14,622,978 | 14,622,978 | 14,622,978 | 14,622,978 | 14,622,978 | 14,622,978 |
| Utility cost              | 10,929,475  | 10,929,475  | 10,929,475 | 10,929,475 | 10,929,475 | 10,929,475 | 10,929,475 | 10,929,475 | 10,929,475 | 10,929,475 | 10,929,475 |
| Baghouse Bags             |             |             | 535,125    |            |            |            |            | 535,125    |            |            |            |
| Fixed Operating Costs     | 11,456,049  | 11,456,049  | 11,456,049 | 11,456,049 | 11,456,049 | 11,456,049 | 11,456,049 | 11,456,049 | 11,456,049 | 11,456,049 | 11,456,049 |
| Total Product Cost        | 37,008,502  | 37,008,502  | 37,543,628 | 37,008,502 | 37,008,502 | 37,008,502 | 37,008,502 | 37,543,628 | 37,008,502 | 37,008,502 | 37,008,502 |
| Annual Depreciation       |             |             |            |            |            |            |            |            |            |            |            |
| General Plant             |             |             |            |            |            |            |            |            |            |            |            |
| Depreciation Charge       |             |             |            |            |            |            |            |            |            |            |            |
| Remaining Value           |             |             |            |            |            |            |            |            |            |            |            |
| Heat and Power Plant      | 4.46%       | 4.46%       | 4.46%      | 4.46%      | 4.46%      | 4.46%      | 4.46%      | 4.46%      | 4.46%      | 4.46%      | 4.46%      |
| Depreciation Charge       | 2,682,246   | 2,681,645   | 2,682,246  | 2,681,645  | 2,682,246  | 2,681,645  | 2,682,246  | 2,681,645  | 2,682,246  | 2,681,645  | 2,682,246  |
| Remaining Value           | 30,842,219  | 28,160,574  | 25,478,329 | 22,796,684 | 20,114,438 | 17,432,794 | 14,750,548 | 12,068,903 | 9,386,658  | 6,705,013  | 4,022,767  |
| Net Revenue               | 29,624,193  | 30,503,115  | 30,907,192 | 32,448,509 | 33,523,889 | 34,675,789 | 35,907,079 | 36,690,678 | 37,225,202 | 37,225,803 | 37,225,202 |
| Losses Forward            | -47,701,389 | -18,077,196 | 0          | 0          | 0          | 0          | 0          | 0          | 0          | 0          | 0          |
| Taxable Income            | -18,077,196 | 12,425,919  | 30,907,192 | 32,448,509 | 33,523,889 | 34,675,789 | 35,907,079 | 36,690,678 | 37,225,202 | 37,225,803 | 37,225,202 |
| Income Tax                | 0           | 4,349,072   | 10,817,517 | 11,356,978 | 11,733,361 | 12,136,526 | 12,567,478 | 12,841,737 | 13,028,821 | 13,029,031 | 13,028,821 |
| Annual Cash Flow          | 19,758,995  | 15,409,923  | 8,406,352  | 8,402,017  | 8,025,634  | 7,622,468  | 7,191,517  | 26,530,585 | 26,878,627 | 26,878,417 | 26,878,627 |
| Discount Factor           | 0.42        | 0.39        | 0.35       | 0.32       | 0.29       | 0.26       | 0.24       | 0.22       | 0.20       | 0.18       | 0.16       |
| Annual Present Value      | 8,379,743   | 5,941,192   | 2,946,375  | 2,677,141  | 2,324,740  | 2,007,234  | 1,721,592  | 5,773,828  | 5,317,793  | 4,834,320  | 4,394,870  |
| TPI + Interest            |             |             |            |            |            |            |            |            |            |            |            |
| NPV                       |             |             |            |            |            |            |            |            |            |            |            |

**Table S18. Discounted cashflow sheet of bioethanol production in Brazil (continued)**

| Year                        | 20         | 21         | 22         | 23         | 24         | 25         | 26         | 27         | 28         | 29         | 30          |
|-----------------------------|------------|------------|------------|------------|------------|------------|------------|------------|------------|------------|-------------|
| Capital Investment          |            |            |            |            |            |            |            |            |            |            |             |
| Land                        |            |            |            |            |            |            |            |            |            |            | -1,848,000  |
| Working Capital             |            |            |            |            |            |            |            |            |            |            | -15,292,532 |
| Loan Payment                | 0          | 0          | 0          | 0          | 0          | 0          | 0          | 0          | 0          | 0          | 0           |
| Loan Interest Payment       | 0          | 0          | 0          | 0          | 0          | 0          | 0          | 0          | 0          | 0          | 0           |
| Loan Principal              | 0          | 0          | 0          | 0          | 0          | 0          | 0          | 0          | 0          | 0          | 0           |
| Ethanol                     | 76,851,707 | 76,851,707 | 76,851,707 | 76,851,707 | 76,851,707 | 76,851,707 | 76,851,707 | 76,851,707 | 76,851,707 | 76,851,707 | 76,851,707  |
| Other sales                 | 64,244     | 64,244     | 64,244     | 64,244     | 64,244     | 64,244     | 64,244     | 64,244     | 64,244     | 64,244     | 64,244      |
| Total Annual Sales          | 76,915,950 | 76,915,950 | 76,915,950 | 76,915,950 | 76,915,950 | 76,915,950 | 76,915,950 | 76,915,950 | 76,915,950 | 76,915,950 | 76,915,950  |
| Annual Manufacturing Cost   |            |            |            |            |            |            |            |            |            |            |             |
| Raw Material cost           | 14,622,978 | 14,622,978 | 14,622,978 | 14,622,978 | 14,622,978 | 14,622,978 | 14,622,978 | 14,622,978 | 14,622,978 | 14,622,978 | 14,622,978  |
| Utility cost                | 10,929,475 | 10,929,475 | 10,929,475 | 10,929,475 | 10,929,475 | 10,929,475 | 10,929,475 | 10,929,475 | 10,929,475 | 10,929,475 | 10,929,475  |
| Baghouse Bags               |            | 535,125    |            |            |            |            | 535,125    |            |            |            |             |
| Fixed Operating Costs       | 11,456,049 | 11,456,049 | 11,456,049 | 11,456,049 | 11,456,049 | 11,456,049 | 11,456,049 | 11,456,049 | 11,456,049 | 11,456,049 | 11,456,049  |
| Total Product Cost          | 37,008,502 | 37,543,628 | 37,008,502 | 37,008,502 | 37,008,502 | 37,008,502 | 37,543,628 | 37,008,502 | 37,008,502 | 37,008,502 | 37,008,502  |
| Annual Depreciation         |            |            |            |            |            |            |            |            |            |            |             |
| <u>General Plant</u>        |            |            |            |            |            |            |            |            |            |            |             |
| Depreciation Charge         |            |            |            |            |            |            |            |            |            |            |             |
| Remaining Value             |            |            |            |            |            |            |            |            |            |            |             |
| <u>Heat and Power Plant</u> | 4.46%      | 2.23%      |            |            |            |            |            |            |            |            |             |
| Depreciation Charge         | 2,681,645  | 1,341,123  |            |            |            |            |            |            |            |            |             |
| Remaining Value             | 1,341,123  | 0          |            |            |            |            |            |            |            |            |             |
| Net Revenue                 | 37,225,803 | 38,031,200 | 39,907,448 | 39,907,448 | 39,907,448 | 39,907,448 | 39,372,322 | 39,907,448 | 39,907,448 | 39,907,448 | 39,907,448  |
| Losses Forward              | 0          | 0          | 0          | 0          | 0          | 0          | 0          | 0          | 0          | 0          | 0           |
| Taxable Income              | 37,225,803 | 38,031,200 | 39,907,448 | 39,907,448 | 39,907,448 | 39,907,448 | 39,372,322 | 39,907,448 | 39,907,448 | 39,907,448 | 39,907,448  |
| Income Tax                  | 13,029,031 | 13,310,920 | 13,967,607 | 13,967,607 | 13,967,607 | 13,967,607 | 13,780,313 | 13,967,607 | 13,967,607 | 13,967,607 | 13,967,607  |
| Annual Cash Flow            | 26,878,417 | 26,061,403 | 25,939,841 | 25,939,841 | 25,939,841 | 25,939,841 | 25,592,010 | 25,939,841 | 25,939,841 | 25,939,841 | 25,939,841  |
| Discount Factor             | 0.15       | 0.14       | 0.12       | 0.11       | 0.10       | 0.09       | 0.08       | 0.08       | 0.07       | 0.06       | 0.06        |
| Annual Present Value        | 3,995,305  | 3,521,692  | 3,186,605  | 2,896,914  | 2,633,558  | 2,394,144  | 2,147,309  | 1,978,631  | 1,798,755  | 1,635,232  | 1,486,575   |
| TPI + Interest              |            |            |            |            |            |            |            |            |            |            | -982,299    |
| NPV                         |            |            |            |            |            |            |            |            |            |            |             |

**Table S19. Discounted cashflow sheet of biohydrogen production in China**

| Year                        | -2        | -1         | 0          | 1          | 2           | 3           | 4           | 5           | 6           | 7           | 8           |
|-----------------------------|-----------|------------|------------|------------|-------------|-------------|-------------|-------------|-------------|-------------|-------------|
| Capital Investment          | 4,326,347 | 32,447,605 | 17,305,389 |            |             |             |             |             |             |             |             |
| Land                        | 1,848,000 |            |            |            |             |             |             |             |             |             |             |
| Working Capital             |           |            | 6,759,918  |            |             |             |             |             |             |             |             |
| Loan Payment                |           |            |            | 8,906,431  | 8,906,431   | 8,906,431   | 8,906,431   | 8,906,431   | 8,906,431   | 8,906,431   | 8,906,431   |
| Loan Interest Payment       | 454,266   | 3,861,265  | 5,678,331  | 5,678,331  | 5,452,364   | 5,210,579   | 4,951,869   | 4,675,050   | 4,378,853   | 4,061,923   | 3,722,807   |
| Loan Principal              | 6,489,521 | 55,160,928 | 81,119,012 | 77,890,912 | 74,436,844  | 70,740,991  | 66,786,429  | 62,555,048  | 58,027,470  | 53,182,961  | 47,999,337  |
| Hydrogen                    |           |            |            | 33,696,798 | 38,510,626  | 38,510,626  | 38,510,626  | 38,510,626  | 38,510,626  | 38,510,626  | 38,510,626  |
| Other sales                 |           |            |            | 1,590,472  | 1,817,682   | 1,817,682   | 1,817,682   | 1,817,682   | 1,817,682   | 1,817,682   | 1,817,682   |
| Total Annual Sales          |           |            |            | 35,287,270 | 40,328,308  | 40,328,308  | 40,328,308  | 40,328,308  | 40,328,308  | 40,328,308  | 40,328,308  |
| Annual Manufacturing Cost   |           |            |            |            |             |             |             |             |             |             |             |
| Raw Material cost           |           |            |            | 13,140,625 | 14,016,667  | 14,016,667  | 14,016,667  | 14,016,667  | 14,016,667  | 14,016,667  | 14,016,667  |
| Utility cost                |           |            |            | 202,834    | 216,356     | 216,356     | 216,356     | 216,356     | 216,356     | 216,356     | 216,356     |
| Baghouse Bags               |           |            |            | 535,125    |             |             |             | 535,125     |             |             |             |
| Fixed Operating Costs       |           |            |            | 7,677,497  | 8,189,331   | 8,189,331   | 8,189,331   | 8,189,331   | 8,189,331   | 8,189,331   | 8,189,331   |
| Total Product Cost          |           |            |            | 21,556,082 | 22,422,353  | 22,422,353  | 22,422,353  | 22,422,353  | 22,957,479  | 22,422,353  | 22,422,353  |
| Annual Depreciation         |           |            |            |            |             |             |             |             |             |             |             |
| <u>General Plant</u>        |           |            |            | 14.29%     | 24.49%      | 17.49%      | 12.49%      | 8.93%       | 8.92%       | 8.93%       | 4.46%       |
| Depreciation Charge         |           |            |            | 16,555,613 | 28,372,775  | 20,262,958  | 14,470,231  | 10,345,810  | 10,334,224  | 10,345,810  | 5,167,112   |
| Remaining Value             |           |            |            | 99,298,919 | 70,926,144  | 50,663,187  | 36,192,956  | 25,847,146  | 15,512,922  | 5,167,112   | 0           |
| <u>Heat and Power Plant</u> |           |            |            | 3.75%      | 7.22%       | 6.68%       | 6.18%       | 5.71%       | 5.29%       | 4.89%       | 4.52%       |
| Depreciation Charge         |           |            |            | 725,393    | 1,396,431   | 1,291,587   | 1,194,868   | 1,105,113   | 1,022,321   | 945,526     | 874,728     |
| Remaining Value             |           |            |            | 18,618,429 | 17,221,998  | 15,930,411  | 14,735,544  | 13,630,431  | 12,608,110  | 11,662,584  | 10,787,856  |
| Net Revenue                 |           |            |            | -9,228,149 | -17,315,614 | -8,859,169  | -2,711,013  | 1,779,983   | 1,635,431   | 2,552,696   | 8,141,308   |
| Losses Forward              |           |            |            |            | -9,228,149  | -26,543,763 | -35,402,931 | -38,113,944 | -36,333,962 | -34,698,531 | -32,145,834 |
| Taxable Income              |           |            |            | -9,228,149 | -26,543,763 | -35,402,931 | -38,113,944 | -36,333,962 | -34,698,531 | -32,145,834 | -24,004,526 |
| Income Tax                  |           |            |            | 0          | 0           | 0           | 0           | 0           | 0           | 0           | 0           |
| Annual Cash Flow            |           |            |            | 4,824,757  | 8,999,524   | 8,999,524   | 8,999,524   | 8,999,524   | 8,464,398   | 8,999,524   | 8,999,524   |
| Discount Factor             | 1.21      | 1.10       | 1.00       | 0.91       | 0.83        | 0.75        | 0.68        | 0.62        | 0.56        | 0.51        | 0.47        |
| Annual Present Value        |           |            |            | 4,386,142  | 7,437,623   | 6,761,475   | 6,146,796   | 5,587,996   | 4,777,932   | 4,618,179   | 4,198,344   |
| TPI + Interest              | 8,020,623 | 39,939,757 | 29,743,638 |            |             |             |             |             |             |             |             |
| NPV                         |           |            | 0          |            |             |             |             |             |             |             |             |

**Table S19. Discounted cashflow sheet of biohydrogen production in China (continued)**

| Year                      | 9           | 10          | 11         | 12         | 13         | 14         | 15         | 16         | 17         | 18         | 19         |
|---------------------------|-------------|-------------|------------|------------|------------|------------|------------|------------|------------|------------|------------|
| Capital Investment        |             |             |            |            |            |            |            |            |            |            |            |
| Land                      |             |             |            |            |            |            |            |            |            |            |            |
| Working Capital           |             |             |            |            |            |            |            |            |            |            |            |
| Loan Payment              | 8,906,431   | 8,906,431   | 8,906,431  | 8,906,431  | 8,906,431  | 8,906,431  | 8,906,431  | 0          | 0          | 0          | 0          |
| Loan Interest Payment     | 3,359,954   | 2,971,700   | 2,556,269  | 2,111,758  | 1,636,130  | 1,127,209  | 582,664    | 0          | 0          | 0          | 0          |
| Loan Principal            | 42,452,859  | 36,518,128  | 30,167,965 | 23,373,291 | 16,102,990 | 8,323,768  | 0          | 0          | 0          | 0          | 0          |
| Hydrogen                  | 38,510,626  | 38,510,626  | 38,510,626 | 38,510,626 | 38,510,626 | 38,510,626 | 38,510,626 | 38,510,626 | 38,510,626 | 38,510,626 | 38,510,626 |
| Other sales               | 1,817,682   | 1,817,682   | 1,817,682  | 1,817,682  | 1,817,682  | 1,817,682  | 1,817,682  | 1,817,682  | 1,817,682  | 1,817,682  | 1,817,682  |
| Total Annual Sales        | 40,328,308  | 40,328,308  | 40,328,308 | 40,328,308 | 40,328,308 | 40,328,308 | 40,328,308 | 40,328,308 | 40,328,308 | 40,328,308 | 40,328,308 |
| Annual Manufacturing Cost |             |             |            |            |            |            |            |            |            |            |            |
| Raw Material cost         | 14,016,667  | 14,016,667  | 14,016,667 | 14,016,667 | 14,016,667 | 14,016,667 | 14,016,667 | 14,016,667 | 14,016,667 | 14,016,667 | 14,016,667 |
| Utility cost              | 216,356     | 216,356     | 216,356    | 216,356    | 216,356    | 216,356    | 216,356    | 216,356    | 216,356    | 216,356    | 216,356    |
| Baghouse Bags             |             |             | 535,125    |            |            |            |            | 535,125    |            |            |            |
| Fixed Operating Costs     | 8,189,331   | 8,189,331   | 8,189,331  | 8,189,331  | 8,189,331  | 8,189,331  | 8,189,331  | 8,189,331  | 8,189,331  | 8,189,331  | 8,189,331  |
| Total Product Cost        | 22,422,353  | 22,422,353  | 22,957,479 | 22,422,353 | 22,422,353 | 22,422,353 | 22,422,353 | 22,957,479 | 22,422,353 | 22,422,353 | 22,422,353 |
| Annual Depreciation       |             |             |            |            |            |            |            |            |            |            |            |
| General Plant             |             |             |            |            |            |            |            |            |            |            |            |
| Depreciation Charge       |             |             |            |            |            |            |            |            |            |            |            |
| Remaining Value           |             |             |            |            |            |            |            |            |            |            |            |
| Heat and Power Plant      | 4.46%       | 4.46%       | 4.46%      | 4.46%      | 4.46%      | 4.46%      | 4.46%      | 4.46%      | 4.46%      | 4.46%      | 4.46%      |
| Depreciation Charge       | 863,121     | 862,928     | 863,121    | 862,928    | 863,121    | 862,928    | 863,121    | 862,928    | 863,121    | 862,928    | 863,121    |
| Remaining Value           | 9,924,735   | 9,061,807   | 8,198,686  | 7,335,758  | 6,472,636  | 5,609,708  | 4,746,587  | 3,883,659  | 3,020,538  | 2,157,610  | 1,294,489  |
| Net Revenue               | 13,682,880  | 14,071,327  | 13,951,439 | 14,931,270 | 15,406,703 | 15,915,818 | 16,460,170 | 16,507,902 | 17,042,834 | 17,043,027 | 17,042,834 |
| Losses Forward            | -24,004,526 | -10,321,646 | 0          | 0          | 0          | 0          | 0          | 0          | 0          | 0          | 0          |
| Taxable Income            | -10,321,646 | 3,749,681   | 13,951,439 | 14,931,270 | 15,406,703 | 15,915,818 | 16,460,170 | 16,507,902 | 17,042,834 | 17,043,027 | 17,042,834 |
| Income Tax                | 0           | 1,312,388   | 4,883,004  | 5,225,944  | 5,392,346  | 5,570,536  | 5,761,059  | 5,777,766  | 5,964,992  | 5,965,059  | 5,964,992  |
| Annual Cash Flow          | 8,999,524   | 7,687,135   | 3,581,394  | 3,773,579  | 3,607,177  | 3,428,987  | 3,238,464  | 11,593,064 | 11,940,963 | 11,940,896 | 11,940,963 |
| Discount Factor           | 0.42        | 0.39        | 0.35       | 0.32       | 0.29       | 0.26       | 0.24       | 0.22       | 0.20       | 0.18       | 0.16       |
| Annual Present Value      | 3,816,676   | 2,963,723   | 1,255,257  | 1,202,379  | 1,044,871  | 902,960    | 775,263    | 2,522,988  | 2,362,456  | 2,147,675  | 1,952,443  |
| TPI + Interest            |             |             |            |            |            |            |            |            |            |            |            |
| NPV                       |             |             |            |            |            |            |            |            |            |            |            |

**Table S19. Discounted cashflow sheet of biohydrogen production in China (continued)**

| Year                        | 20         | 21         | 22         | 23         | 24         | 25         | 26         | 27         | 28         | 29         | 30         |
|-----------------------------|------------|------------|------------|------------|------------|------------|------------|------------|------------|------------|------------|
| Capital Investment          |            |            |            |            |            |            |            |            |            |            |            |
| Land                        |            |            |            |            |            |            |            |            |            |            | -1,848,000 |
| Working Capital             |            |            |            |            |            |            |            |            |            |            | -6,759,918 |
| Loan Payment                | 0          | 0          | 0          | 0          | 0          | 0          | 0          | 0          | 0          | 0          | 0          |
| Loan Interest Payment       | 0          | 0          | 0          | 0          | 0          | 0          | 0          | 0          | 0          | 0          | 0          |
| Loan Principal              | 0          | 0          | 0          | 0          | 0          | 0          | 0          | 0          | 0          | 0          | 0          |
| Hydrogen                    | 38,510,626 | 38,510,626 | 38,510,626 | 38,510,626 | 38,510,626 | 38,510,626 | 38,510,626 | 38,510,626 | 38,510,626 | 38,510,626 | 38,510,626 |
| Other sales                 | 1,817,682  | 1,817,682  | 1,817,682  | 1,817,682  | 1,817,682  | 1,817,682  | 1,817,682  | 1,817,682  | 1,817,682  | 1,817,682  | 1,817,682  |
| Total Annual Sales          | 40,328,308 | 40,328,308 | 40,328,308 | 40,328,308 | 40,328,308 | 40,328,308 | 40,328,308 | 40,328,308 | 40,328,308 | 40,328,308 | 40,328,308 |
| Annual Manufacturing Cost   |            |            |            |            |            |            |            |            |            |            |            |
| Raw Material cost           | 14,016,667 | 14,016,667 | 14,016,667 | 14,016,667 | 14,016,667 | 14,016,667 | 14,016,667 | 14,016,667 | 14,016,667 | 14,016,667 | 14,016,667 |
| Utility cost                | 216,356    | 216,356    | 216,356    | 216,356    | 216,356    | 216,356    | 216,356    | 216,356    | 216,356    | 216,356    | 216,356    |
| Baghouse Bags               |            | 535,125    |            |            |            |            | 535,125    |            |            |            |            |
| Fixed Operating Costs       | 8,189,331  | 8,189,331  | 8,189,331  | 8,189,331  | 8,189,331  | 8,189,331  | 8,189,331  | 8,189,331  | 8,189,331  | 8,189,331  | 8,189,331  |
| Total Product Cost          | 22,422,353 | 22,957,479 | 22,422,353 | 22,422,353 | 22,422,353 | 22,422,353 | 22,957,479 | 22,422,353 | 22,422,353 | 22,422,353 | 22,422,353 |
| Annual Depreciation         |            |            |            |            |            |            |            |            |            |            |            |
| <u>General Plant</u>        |            |            |            |            |            |            |            |            |            |            |            |
| Depreciation Charge         |            |            |            |            |            |            |            |            |            |            |            |
| Remaining Value             |            |            |            |            |            |            |            |            |            |            |            |
| <u>Heat and Power Plant</u> | 4.46%      | 2.23%      |            |            |            |            |            |            |            |            |            |
| Depreciation Charge         | 862,928    | 431,561    |            |            |            |            |            |            |            |            |            |
| Remaining Value             | 431,561    | 0          |            |            |            |            |            |            |            |            |            |
| Net Revenue                 | 17,043,027 | 16,939,269 | 17,905,955 | 17,905,955 | 17,905,955 | 17,905,955 | 17,370,830 | 17,905,955 | 17,905,955 | 17,905,955 | 17,905,955 |
| Losses Forward              | 0          | 0          | 0          | 0          | 0          | 0          | 0          | 0          | 0          | 0          | 0          |
| Taxable Income              | 17,043,027 | 16,939,269 | 17,905,955 | 17,905,955 | 17,905,955 | 17,905,955 | 17,370,830 | 17,905,955 | 17,905,955 | 17,905,955 | 17,905,955 |
| Income Tax                  | 5,965,059  | 5,928,744  | 6,267,084  | 6,267,084  | 6,267,084  | 6,267,084  | 6,079,790  | 6,267,084  | 6,267,084  | 6,267,084  | 6,267,084  |
| Annual Cash Flow            | 11,940,896 | 11,442,085 | 11,638,871 | 11,638,871 | 11,638,871 | 11,638,871 | 11,291,039 | 11,638,871 | 11,638,871 | 11,638,871 | 11,638,871 |
| Discount Factor             | 0.15       | 0.14       | 0.12       | 0.11       | 0.10       | 0.09       | 0.08       | 0.08       | 0.07       | 0.06       | 0.06       |
| Annual Present Value        | 1,774,938  | 1,546,176  | 1,429,788  | 1,299,808  | 1,181,643  | 1,074,221  | 947,380    | 887,786    | 807,078    | 733,708    | 667,007    |
| TPI + Interest              |            |            |            |            |            |            |            |            |            |            | -493,307   |
| NPV                         |            |            |            |            |            |            |            |            |            |            |            |

**Table S20. Discounted cashflow sheet of biohydrogen production in India**

| Year                        | -2        | -1         | 0          | 1           | 2           | 3           | 4           | 5           | 6           | 7           | 8           |
|-----------------------------|-----------|------------|------------|-------------|-------------|-------------|-------------|-------------|-------------|-------------|-------------|
| Capital Investment          | 4,787,102 | 35,903,265 | 19,148,408 |             |             |             |             |             |             |             |             |
| Land                        | 1,848,000 |            |            |             |             |             |             |             |             |             |             |
| Working Capital             |           |            | 7,479,847  |             |             |             |             |             |             |             |             |
| Loan Payment                |           |            |            | 9,854,964   | 9,854,964   | 9,854,964   | 9,854,964   | 9,854,964   | 9,854,964   | 9,854,964   | 9,854,964   |
| Loan Interest Payment       | 502,646   | 4,272,489  | 6,283,071  | 6,283,071   | 6,033,039   | 5,765,504   | 5,479,242   | 5,172,941   | 4,845,200   | 4,494,516   | 4,119,285   |
| Loan Principal              | 7,180,653 | 61,035,550 | 89,758,162 | 86,186,269  | 82,364,345  | 78,274,885  | 73,899,163  | 69,217,141  | 64,207,377  | 58,846,930  | 53,111,251  |
| Hydrogen                    |           |            |            | 35,368,623  | 40,421,283  | 40,421,283  | 40,421,283  | 40,421,283  | 40,421,283  | 40,421,283  | 40,421,283  |
| Other sales                 |           |            |            | 1,933,514   | 2,209,731   | 2,209,731   | 2,209,731   | 2,209,731   | 2,209,731   | 2,209,731   | 2,209,731   |
| Total Annual Sales          |           |            |            | 37,302,137  | 42,631,014  | 42,631,014  | 42,631,014  | 42,631,014  | 42,631,014  | 42,631,014  | 42,631,014  |
| Annual Manufacturing Cost   |           |            |            |             |             |             |             |             |             |             |             |
| Raw Material cost           |           |            |            | 13,140,625  | 14,016,667  | 14,016,667  | 14,016,667  | 14,016,667  | 14,016,667  | 14,016,667  | 14,016,667  |
| Utility cost                |           |            |            | 349,412     | 372,706     | 372,706     | 372,706     | 372,706     | 372,706     | 372,706     | 372,706     |
| Baghouse Bags               |           |            |            | 535,125     |             |             |             |             | 535,125     |             |             |
| Fixed Operating Costs       |           |            |            | 7,960,145   | 8,490,822   | 8,490,822   | 8,490,822   | 8,490,822   | 8,490,822   | 8,490,822   | 8,490,822   |
| Total Product Cost          |           |            |            | 21,985,308  | 22,880,194  | 22,880,194  | 22,880,194  | 22,880,194  | 23,415,320  | 22,880,194  | 22,880,194  |
| Annual Depreciation         |           |            |            |             |             |             |             |             |             |             |             |
| <u>General Plant</u>        |           |            |            | 14.29%      | 24.49%      | 17.49%      | 12.49%      | 8.93%       | 8.92%       | 8.93%       | 4.46%       |
| Depreciation Charge         |           |            |            | 18,354,843  | 31,456,270  | 22,465,094  | 16,042,826  | 11,470,171  | 11,457,326  | 11,470,171  | 5,728,663   |
| Remaining Value             |           |            |            | 110,090,522 | 78,634,252  | 56,169,158  | 40,126,332  | 28,656,161  | 17,198,834  | 5,728,663   | 0           |
| <u>Heat and Power Plant</u> |           |            |            | 3.75%       | 7.22%       | 6.68%       | 6.18%       | 5.71%       | 5.29%       | 4.89%       | 4.52%       |
| Depreciation Charge         |           |            |            | 793,184     | 1,526,932   | 1,412,290   | 1,306,533   | 1,208,389   | 1,117,861   | 1,033,889   | 956,474     |
| Remaining Value             |           |            |            | 20,358,388  | 18,831,456  | 17,419,166  | 16,112,633  | 14,904,244  | 13,786,383  | 12,752,494  | 11,796,020  |
| Net Revenue                 |           |            |            | -10,114,269 | -19,265,421 | -9,892,069  | -3,077,781  | 1,899,318   | 1,795,307   | 2,752,243   | 8,946,397   |
| Losses Forward              |           |            |            |             | -10,114,269 | -29,379,690 | -39,271,759 | -42,349,541 | -40,450,223 | -38,654,916 | -35,902,673 |
| Taxable Income              |           |            |            | -10,114,269 | -29,379,690 | -39,271,759 | -42,349,541 | -40,450,223 | -38,654,916 | -35,902,673 | -26,956,276 |
| Income Tax                  |           |            |            | 0           | 0           | 0           | 0           | 0           | 0           | 0           | 0           |
| Annual Cash Flow            |           |            |            | 5,461,866   | 9,895,856   | 9,895,856   | 9,895,856   | 9,895,856   | 9,360,730   | 9,895,856   | 9,895,856   |
| Discount Factor             | 1.21      | 1.10       | 1.00       | 0.91        | 0.83        | 0.75        | 0.68        | 0.62        | 0.56        | 0.51        | 0.47        |
| Annual Present Value        |           |            |            | 4,965,332   | 8,178,393   | 7,434,903   | 6,759,003   | 6,144,548   | 5,283,888   | 5,078,139   | 4,616,490   |
| TPI + Interest              | 8,636,675 | 44,193,329 | 32,911,326 |             |             |             |             |             |             |             |             |
| NPV                         |           |            | 0          |             |             |             |             |             |             |             |             |

**Table S20. Discounted cashflow sheet of biohydrogen production in India (continued)**

| Year                      | 9           | 10          | 11         | 12         | 13         | 14         | 15         | 16         | 17         | 18         | 19         |
|---------------------------|-------------|-------------|------------|------------|------------|------------|------------|------------|------------|------------|------------|
| Capital Investment        |             |             |            |            |            |            |            |            |            |            |            |
| Land                      |             |             |            |            |            |            |            |            |            |            |            |
| Working Capital           |             |             |            |            |            |            |            |            |            |            |            |
| Loan Payment              | 9,854,964   | 9,854,964   | 9,854,964  | 9,854,964  | 9,854,964  | 9,854,964  | 9,854,964  | 0          | 0          | 0          | 0          |
| Loan Interest Payment     | 3,717,788   | 3,288,185   | 2,828,511  | 2,336,659  | 1,810,378  | 1,247,257  | 644,717    | 0          | 0          | 0          | 0          |
| Loan Principal            | 46,974,075  | 40,407,297  | 33,380,844 | 25,862,539 | 17,817,953 | 9,210,246  | 0          | 0          | 0          | 0          | 0          |
| Hydrogen                  | 40,421,283  | 40,421,283  | 40,421,283 | 40,421,283 | 40,421,283 | 40,421,283 | 40,421,283 | 40,421,283 | 40,421,283 | 40,421,283 | 40,421,283 |
| Other sales               | 2,209,731   | 2,209,731   | 2,209,731  | 2,209,731  | 2,209,731  | 2,209,731  | 2,209,731  | 2,209,731  | 2,209,731  | 2,209,731  | 2,209,731  |
| Total Annual Sales        | 42,631,014  | 42,631,014  | 42,631,014 | 42,631,014 | 42,631,014 | 42,631,014 | 42,631,014 | 42,631,014 | 42,631,014 | 42,631,014 | 42,631,014 |
| Annual Manufacturing Cost |             |             |            |            |            |            |            |            |            |            |            |
| Raw Material cost         | 14,016,667  | 14,016,667  | 14,016,667 | 14,016,667 | 14,016,667 | 14,016,667 | 14,016,667 | 14,016,667 | 14,016,667 | 14,016,667 | 14,016,667 |
| Utility cost              | 372,706     | 372,706     | 372,706    | 372,706    | 372,706    | 372,706    | 372,706    | 372,706    | 372,706    | 372,706    | 372,706    |
| Baghouse Bags             |             |             | 535,125    |            |            |            |            | 535,125    |            |            |            |
| Fixed Operating Costs     | 8,490,822   | 8,490,822   | 8,490,822  | 8,490,822  | 8,490,822  | 8,490,822  | 8,490,822  | 8,490,822  | 8,490,822  | 8,490,822  | 8,490,822  |
| Total Product Cost        | 22,880,194  | 22,880,194  | 23,415,320 | 22,880,194 | 22,880,194 | 22,880,194 | 22,880,194 | 23,415,320 | 22,880,194 | 22,880,194 | 22,880,194 |
| Annual Depreciation       |             |             |            |            |            |            |            |            |            |            |            |
| General Plant             |             |             |            |            |            |            |            |            |            |            |            |
| Depreciation Charge       |             |             |            |            |            |            |            |            |            |            |            |
| Remaining Value           |             |             |            |            |            |            |            |            |            |            |            |
| Heat and Power Plant      | 4.46%       | 4.46%       | 4.46%      | 4.46%      | 4.46%      | 4.46%      | 4.46%      | 4.46%      | 4.46%      | 4.46%      | 4.46%      |
| Depreciation Charge       | 943,783     | 943,572     | 943,783    | 943,572    | 943,783    | 943,572    | 943,783    | 943,572    | 943,783    | 943,572    | 943,783    |
| Remaining Value           | 10,852,237  | 9,908,665   | 8,964,882  | 8,021,311  | 7,077,528  | 6,133,956  | 5,190,173  | 4,246,601  | 3,302,818  | 2,359,246  | 1,415,463  |
| Net Revenue               | 15,089,249  | 15,519,062  | 15,443,400 | 16,470,589 | 16,996,658 | 17,559,991 | 18,162,319 | 18,272,122 | 18,807,036 | 18,807,248 | 18,807,036 |
| Losses Forward            | -26,956,276 | -11,867,028 | 0          | 0          | 0          | 0          | 0          | 0          | 0          | 0          | 0          |
| Taxable Income            | -11,867,028 | 3,652,035   | 15,443,400 | 16,470,589 | 16,996,658 | 17,559,991 | 18,162,319 | 18,272,122 | 18,807,036 | 18,807,248 | 18,807,036 |
| Income Tax                | 0           | 1,278,212   | 5,405,190  | 5,764,706  | 5,948,830  | 6,145,997  | 6,356,812  | 6,395,243  | 6,582,463  | 6,582,537  | 6,582,463  |
| Annual Cash Flow          | 9,895,856   | 8,617,643   | 3,955,540  | 4,131,150  | 3,947,025  | 3,749,859  | 3,539,044  | 12,820,451 | 13,168,357 | 13,168,283 | 13,168,357 |
| Discount Factor           | 0.42        | 0.39        | 0.35       | 0.32       | 0.29       | 0.26       | 0.24       | 0.22       | 0.20       | 0.18       | 0.16       |
| Annual Present Value      | 4,196,809   | 3,322,475   | 1,386,393  | 1,316,312  | 1,143,313  | 987,455    | 847,219    | 2,790,104  | 2,605,289  | 2,368,431  | 2,153,132  |
| TPI + Interest            |             |             |            |            |            |            |            |            |            |            |            |
| NPV                       |             |             |            |            |            |            |            |            |            |            |            |

**Table S20. Discounted cashflow sheet of biohydrogen production in India (continued)**

| Year                        | 20         | 21         | 22         | 23         | 24         | 25         | 26         | 27         | 28         | 29         | 30         |            |
|-----------------------------|------------|------------|------------|------------|------------|------------|------------|------------|------------|------------|------------|------------|
| Capital Investment          |            |            |            |            |            |            |            |            |            |            |            |            |
| Land                        |            |            |            |            |            |            |            |            |            |            |            | -1,848,000 |
| Working Capital             |            |            |            |            |            |            |            |            |            |            |            | -7,479,847 |
| Loan Payment                | 0          | 0          | 0          | 0          | 0          | 0          | 0          | 0          | 0          | 0          | 0          | 0          |
| Loan Interest Payment       | 0          | 0          | 0          | 0          | 0          | 0          | 0          | 0          | 0          | 0          | 0          | 0          |
| Loan Principal              | 0          | 0          | 0          | 0          | 0          | 0          | 0          | 0          | 0          | 0          | 0          | 0          |
| Hydrogen                    | 40,421,283 | 40,421,283 | 40,421,283 | 40,421,283 | 40,421,283 | 40,421,283 | 40,421,283 | 40,421,283 | 40,421,283 | 40,421,283 | 40,421,283 | 40,421,283 |
| Other sales                 | 2,209,731  | 2,209,731  | 2,209,731  | 2,209,731  | 2,209,731  | 2,209,731  | 2,209,731  | 2,209,731  | 2,209,731  | 2,209,731  | 2,209,731  | 2,209,731  |
| Total Annual Sales          | 42,631,014 | 42,631,014 | 42,631,014 | 42,631,014 | 42,631,014 | 42,631,014 | 42,631,014 | 42,631,014 | 42,631,014 | 42,631,014 | 42,631,014 | 42,631,014 |
| Annual Manufacturing Cost   |            |            |            |            |            |            |            |            |            |            |            |            |
| Raw Material cost           | 14,016,667 | 14,016,667 | 14,016,667 | 14,016,667 | 14,016,667 | 14,016,667 | 14,016,667 | 14,016,667 | 14,016,667 | 14,016,667 | 14,016,667 | 14,016,667 |
| Utility cost                | 372,706    | 372,706    | 372,706    | 372,706    | 372,706    | 372,706    | 372,706    | 372,706    | 372,706    | 372,706    | 372,706    | 372,706    |
| Baghouse Bags               |            | 535,125    |            |            |            |            | 535,125    |            |            |            |            |            |
| Fixed Operating Costs       | 8,490,822  | 8,490,822  | 8,490,822  | 8,490,822  | 8,490,822  | 8,490,822  | 8,490,822  | 8,490,822  | 8,490,822  | 8,490,822  | 8,490,822  | 8,490,822  |
| Total Product Cost          | 22,880,194 | 23,415,320 | 22,880,194 | 22,880,194 | 22,880,194 | 22,880,194 | 23,415,320 | 22,880,194 | 22,880,194 | 22,880,194 | 22,880,194 | 22,880,194 |
| Annual Depreciation         |            |            |            |            |            |            |            |            |            |            |            |            |
| <u>General Plant</u>        |            |            |            |            |            |            |            |            |            |            |            |            |
| Depreciation Charge         |            |            |            |            |            |            |            |            |            |            |            |            |
| Remaining Value             |            |            |            |            |            |            |            |            |            |            |            |            |
| <u>Heat and Power Plant</u> | 4.46%      | 2.23%      |            |            |            |            |            |            |            |            |            |            |
| Depreciation Charge         | 943,572    | 471,892    |            |            |            |            |            |            |            |            |            |            |
| Remaining Value             | 471,892    | 0          |            |            |            |            |            |            |            |            |            |            |
| Net Revenue                 | 18,807,248 | 18,743,802 | 19,750,819 | 19,750,819 | 19,750,819 | 19,750,819 | 19,215,694 | 19,750,819 | 19,750,819 | 19,750,819 | 19,750,819 | 19,750,819 |
| Losses Forward              | 0          | 0          | 0          | 0          | 0          | 0          | 0          | 0          | 0          | 0          | 0          | 0          |
| Taxable Income              | 18,807,248 | 18,743,802 | 19,750,819 | 19,750,819 | 19,750,819 | 19,750,819 | 19,215,694 | 19,750,819 | 19,750,819 | 19,750,819 | 19,750,819 | 19,750,819 |
| Income Tax                  | 6,582,537  | 6,560,331  | 6,912,787  | 6,912,787  | 6,912,787  | 6,912,787  | 6,725,493  | 6,912,787  | 6,912,787  | 6,912,787  | 6,912,787  | 6,912,787  |
| Annual Cash Flow            | 13,168,283 | 12,655,363 | 12,838,033 | 12,838,033 | 12,838,033 | 12,838,033 | 12,490,201 | 12,838,033 | 12,838,033 | 12,838,033 | 12,838,033 | 12,838,033 |
| Discount Factor             | 0.15       | 0.14       | 0.12       | 0.11       | 0.10       | 0.09       | 0.08       | 0.08       | 0.07       | 0.06       | 0.06       | 0.06       |
| Annual Present Value        | 1,957,381  | 1,710,126  | 1,577,101  | 1,433,728  | 1,303,389  | 1,184,899  | 1,047,996  | 979,255    | 890,232    | 809,302    | 735,729    | 735,729    |
| TPI + Interest              |            |            |            |            |            |            |            |            |            |            |            | -534,565   |
| NPV                         |            |            |            |            |            |            |            |            |            |            |            |            |



**Table S21. Discounted cashflow sheet of biohydrogen production in USA**

| Year                        | -2        | -1         | 0          | 1           | 2           | 3           | 4           | 5           | 6           | 7           | 8           |
|-----------------------------|-----------|------------|------------|-------------|-------------|-------------|-------------|-------------|-------------|-------------|-------------|
| Capital Investment          | 5,248,019 | 39,360,143 | 20,992,076 |             |             |             |             |             |             |             |             |
| Land                        | 1,848,000 |            |            |             |             |             |             |             |             |             |             |
| Working Capital             |           |            | 8,200,030  |             |             |             |             |             |             |             |             |
| Loan Payment                |           |            |            | 10,803,830  | 10,803,830  | 10,803,830  | 10,803,830  | 10,803,830  | 10,803,830  | 10,803,830  | 10,803,830  |
| Loan Interest Payment       | 551,042   | 4,683,857  | 6,888,025  | 6,888,025   | 6,613,919   | 6,320,625   | 6,006,801   | 5,671,008   | 5,311,711   | 4,927,262   | 4,515,903   |
| Loan Principal              | 7,872,029 | 66,912,244 | 98,400,358 | 94,484,553  | 90,294,641  | 85,811,436  | 81,014,406  | 75,881,584  | 70,389,464  | 64,512,896  | 58,224,969  |
| Hydrogen                    |           |            |            | 37,009,221  | 42,296,253  | 42,296,253  | 42,296,253  | 42,296,253  | 42,296,253  | 42,296,253  | 42,296,253  |
| Other sales                 |           |            |            | 2,333,317   | 2,666,648   | 2,666,648   | 2,666,648   | 2,666,648   | 2,666,648   | 2,666,648   | 2,666,648   |
| Total Annual Sales          |           |            |            | 39,342,538  | 44,962,900  | 44,962,900  | 44,962,900  | 44,962,900  | 44,962,900  | 44,962,900  | 44,962,900  |
| Annual Manufacturing Cost   |           |            |            |             |             |             |             |             |             |             |             |
| Raw Material cost           |           |            |            | 13,140,625  | 14,016,667  | 14,016,667  | 14,016,667  | 14,016,667  | 14,016,667  | 14,016,667  | 14,016,667  |
| Utility cost                |           |            |            | 521,993     | 556,792     | 556,792     | 556,792     | 556,792     | 556,792     | 556,792     | 556,792     |
| Baghouse Bags               |           |            |            | 535,125     |             |             |             | 535,125     |             |             |             |
| Fixed Operating Costs       |           |            |            | 8,243,493   | 8,793,059   | 8,793,059   | 8,793,059   | 8,793,059   | 8,793,059   | 8,793,059   | 8,793,059   |
| Total Product Cost          |           |            |            | 22,441,236  | 23,366,518  | 23,366,518  | 23,366,518  | 23,366,518  | 23,901,644  | 23,366,518  | 23,366,518  |
| Annual Depreciation         |           |            |            |             |             |             |             |             |             |             |             |
| <u>General Plant</u>        |           |            |            | 14.29%      | 24.49%      | 17.49%      | 12.49%      | 8.93%       | 8.92%       | 8.93%       | 4.46%       |
| Depreciation Charge         |           |            |            | 20,160,625  | 34,550,994  | 24,675,251  | 17,621,148  | 12,598,627  | 12,584,519  | 12,598,627  | 6,292,259   |
| Remaining Value             |           |            |            | 120,921,426 | 86,370,431  | 61,695,181  | 44,074,033  | 31,475,406  | 18,890,887  | 6,292,259   | 0           |
| <u>Heat and Power Plant</u> |           |            |            | 3.75%       | 7.22%       | 6.68%       | 6.18%       | 5.71%       | 5.29%       | 4.89%       | 4.52%       |
| Depreciation Charge         |           |            |            | 859,445     | 1,654,490   | 1,530,271   | 1,415,679   | 1,309,337   | 1,211,245   | 1,120,259   | 1,036,377   |
| Remaining Value             |           |            |            | 22,059,101  | 20,404,611  | 18,874,340  | 17,458,661  | 16,149,325  | 14,938,079  | 13,817,821  | 12,781,444  |
| Net Revenue                 |           |            |            | -11,006,794 | -21,223,021 | -10,929,765 | -3,447,245  | 2,017,410   | 1,953,782   | 2,950,234   | 9,751,843   |
| Losses Forward              |           |            |            |             | -11,006,794 | -32,229,814 | -43,159,579 | -46,606,824 | -44,589,414 | -42,635,632 | -39,685,398 |
| Taxable Income              |           |            |            | -11,006,794 | -32,229,814 | -43,159,579 | -46,606,824 | -44,589,414 | -42,635,632 | -39,685,398 | -29,933,555 |
| Income Tax                  |           |            |            | 0           | 0           | 0           | 0           | 0           | 0           | 0           | 0           |
| Annual Cash Flow            |           |            |            | 6,097,471   | 10,792,552  | 10,792,552  | 10,792,552  | 10,792,552  | 10,257,426  | 10,792,552  | 10,792,552  |
| Discount Factor             | 1.21      | 1.10       | 1.00       | 0.91        | 0.83        | 0.75        | 0.68        | 0.62        | 0.56        | 0.51        | 0.47        |
| Annual Present Value        |           |            |            | 5,543,156   | 8,919,464   | 8,108,604   | 7,371,458   | 6,701,326   | 5,790,050   | 5,538,286   | 5,034,805   |
| TPI + Interest              | 9,252,944 | 48,448,400 | 36,080,131 |             |             |             |             |             |             |             |             |
| NPV                         |           |            | 0          |             |             |             |             |             |             |             |             |

**Table S21. Discounted cashflow sheet of biohydrogen production in USA (continued)**

| Year                      | 9           | 10          | 11         | 12         | 13         | 14         | 15         | 16         | 17         | 18         | 19         |
|---------------------------|-------------|-------------|------------|------------|------------|------------|------------|------------|------------|------------|------------|
| Capital Investment        |             |             |            |            |            |            |            |            |            |            |            |
| Land                      |             |             |            |            |            |            |            |            |            |            |            |
| Working Capital           |             |             |            |            |            |            |            |            |            |            |            |
| Loan Payment              | 10,803,830  | 10,803,830  | 10,803,830 | 10,803,830 | 10,803,830 | 10,803,830 | 10,803,830 | 0          | 0          | 0          | 0          |
| Loan Interest Payment     | 4,075,748   | 3,604,782   | 3,100,849  | 2,561,640  | 1,984,687  | 1,367,347  | 706,793    | 0          | 0          | 0          | 0          |
| Loan Principal            | 51,496,886  | 44,297,838  | 36,594,856 | 28,352,665 | 19,533,522 | 10,097,038 | 0          | 0          | 0          | 0          | 0          |
| Hydrogen                  | 42,296,253  | 42,296,253  | 42,296,253 | 42,296,253 | 42,296,253 | 42,296,253 | 42,296,253 | 42,296,253 | 42,296,253 | 42,296,253 | 42,296,253 |
| Other sales               | 2,666,648   | 2,666,648   | 2,666,648  | 2,666,648  | 2,666,648  | 2,666,648  | 2,666,648  | 2,666,648  | 2,666,648  | 2,666,648  | 2,666,648  |
| Total Annual Sales        | 44,962,900  | 44,962,900  | 44,962,900 | 44,962,900 | 44,962,900 | 44,962,900 | 44,962,900 | 44,962,900 | 44,962,900 | 44,962,900 | 44,962,900 |
| Annual Manufacturing Cost |             |             |            |            |            |            |            |            |            |            |            |
| Raw Material cost         | 14,016,667  | 14,016,667  | 14,016,667 | 14,016,667 | 14,016,667 | 14,016,667 | 14,016,667 | 14,016,667 | 14,016,667 | 14,016,667 | 14,016,667 |
| Utility cost              | 556,792     | 556,792     | 556,792    | 556,792    | 556,792    | 556,792    | 556,792    | 556,792    | 556,792    | 556,792    | 556,792    |
| Baghouse Bags             |             |             | 535,125    |            |            |            |            | 535,125    |            |            |            |
| Fixed Operating Costs     | 8,793,059   | 8,793,059   | 8,793,059  | 8,793,059  | 8,793,059  | 8,793,059  | 8,793,059  | 8,793,059  | 8,793,059  | 8,793,059  | 8,793,059  |
| Total Product Cost        | 23,366,518  | 23,366,518  | 23,901,644 | 23,366,518 | 23,366,518 | 23,366,518 | 23,366,518 | 23,901,644 | 23,366,518 | 23,366,518 | 23,366,518 |
| Annual Depreciation       |             |             |            |            |            |            |            |            |            |            |            |
| General Plant             |             |             |            |            |            |            |            |            |            |            |            |
| Depreciation Charge       |             |             |            |            |            |            |            |            |            |            |            |
| Remaining Value           |             |             |            |            |            |            |            |            |            |            |            |
| Heat and Power Plant      | 4.46%       | 4.46%       | 4.46%      | 4.46%      | 4.46%      | 4.46%      | 4.46%      | 4.46%      | 4.46%      | 4.46%      | 4.46%      |
| Depreciation Charge       | 1,022,626   | 1,022,396   | 1,022,626  | 1,022,396  | 1,022,626  | 1,022,396  | 1,022,626  | 1,022,396  | 1,022,626  | 1,022,396  | 1,022,626  |
| Remaining Value           | 11,758,819  | 10,736,422  | 9,713,797  | 8,691,400  | 7,668,775  | 6,646,378  | 5,623,753  | 4,601,357  | 3,578,731  | 2,556,335  | 1,533,709  |
| Net Revenue               | 16,498,009  | 16,969,204  | 16,937,783 | 18,012,346 | 18,589,070 | 19,206,639 | 19,866,964 | 20,038,860 | 20,573,757 | 20,573,986 | 20,573,757 |
| Losses Forward            | -29,933,555 | -13,435,546 | 0          | 0          | 0          | 0          | 0          | 0          | 0          | 0          | 0          |
| Taxable Income            | -13,435,546 | 3,533,658   | 16,937,783 | 18,012,346 | 18,589,070 | 19,206,639 | 19,866,964 | 20,038,860 | 20,573,757 | 20,573,986 | 20,573,757 |
| Income Tax                | 0           | 1,236,780   | 5,928,224  | 6,304,321  | 6,506,175  | 6,722,324  | 6,953,437  | 7,013,601  | 7,200,815  | 7,200,895  | 7,200,815  |
| Annual Cash Flow          | 10,792,552  | 9,555,771   | 4,329,202  | 4,488,231  | 4,286,377  | 4,070,228  | 3,839,114  | 14,047,656 | 14,395,567 | 14,395,487 | 14,395,567 |
| Discount Factor           | 0.42        | 0.39        | 0.35       | 0.32       | 0.29       | 0.26       | 0.24       | 0.22       | 0.20       | 0.18       | 0.16       |
| Annual Present Value      | 4,577,096   | 3,684,164   | 1,517,359  | 1,430,089  | 1,241,611  | 1,071,818  | 919,053    | 3,057,179  | 2,848,086  | 2,589,155  | 2,353,790  |
| TPI + Interest            |             |             |            |            |            |            |            |            |            |            |            |
| NPV                       |             |             |            |            |            |            |            |            |            |            |            |

**Table S21. Discounted cashflow sheet of biohydrogen production in USA (continued)**

| Year                        | 20         | 21         | 22         | 23         | 24         | 25         | 26         | 27         | 28         | 29         | 30         |
|-----------------------------|------------|------------|------------|------------|------------|------------|------------|------------|------------|------------|------------|
| Capital Investment          |            |            |            |            |            |            |            |            |            |            |            |
| Land                        |            |            |            |            |            |            |            |            |            |            | -1,848,000 |
| Working Capital             |            |            |            |            |            |            |            |            |            |            | -8,200,030 |
| Loan Payment                | 0          | 0          | 0          | 0          | 0          | 0          | 0          | 0          | 0          | 0          | 0          |
| Loan Interest Payment       | 0          | 0          | 0          | 0          | 0          | 0          | 0          | 0          | 0          | 0          | 0          |
| Loan Principal              | 0          | 0          | 0          | 0          | 0          | 0          | 0          | 0          | 0          | 0          | 0          |
| Hydrogen                    | 42,296,253 | 42,296,253 | 42,296,253 | 42,296,253 | 42,296,253 | 42,296,253 | 42,296,253 | 42,296,253 | 42,296,253 | 42,296,253 | 42,296,253 |
| Other sales                 | 2,666,648  | 2,666,648  | 2,666,648  | 2,666,648  | 2,666,648  | 2,666,648  | 2,666,648  | 2,666,648  | 2,666,648  | 2,666,648  | 2,666,648  |
| Total Annual Sales          | 44,962,900 | 44,962,900 | 44,962,900 | 44,962,900 | 44,962,900 | 44,962,900 | 44,962,900 | 44,962,900 | 44,962,900 | 44,962,900 | 44,962,900 |
| Annual Manufacturing Cost   |            |            |            |            |            |            |            |            |            |            |            |
| Raw Material cost           | 14,016,667 | 14,016,667 | 14,016,667 | 14,016,667 | 14,016,667 | 14,016,667 | 14,016,667 | 14,016,667 | 14,016,667 | 14,016,667 | 14,016,667 |
| Utility cost                | 556,792    | 556,792    | 556,792    | 556,792    | 556,792    | 556,792    | 556,792    | 556,792    | 556,792    | 556,792    | 556,792    |
| Baghouse Bags               |            | 535,125    |            |            |            |            | 535,125    |            |            |            |            |
| Fixed Operating Costs       | 8,793,059  | 8,793,059  | 8,793,059  | 8,793,059  | 8,793,059  | 8,793,059  | 8,793,059  | 8,793,059  | 8,793,059  | 8,793,059  | 8,793,059  |
| Total Product Cost          | 23,366,518 | 23,901,644 | 23,366,518 | 23,366,518 | 23,366,518 | 23,366,518 | 23,901,644 | 23,366,518 | 23,366,518 | 23,366,518 | 23,366,518 |
| Annual Depreciation         |            |            |            |            |            |            |            |            |            |            |            |
| <u>General Plant</u>        |            |            |            |            |            |            |            |            |            |            |            |
| Depreciation Charge         |            |            |            |            |            |            |            |            |            |            |            |
| Remaining Value             |            |            |            |            |            |            |            |            |            |            |            |
| <u>Heat and Power Plant</u> | 4.46%      | 2.23%      |            |            |            |            |            |            |            |            |            |
| Depreciation Charge         | 1,022,396  | 511,313    |            |            |            |            |            |            |            |            |            |
| Remaining Value             | 511,313    | 0          |            |            |            |            |            |            |            |            |            |
| Net Revenue                 | 20,573,986 | 20,549,944 | 21,596,382 | 21,596,382 | 21,596,382 | 21,596,382 | 21,061,257 | 21,596,382 | 21,596,382 | 21,596,382 | 21,596,382 |
| Losses Forward              | 0          | 0          | 0          | 0          | 0          | 0          | 0          | 0          | 0          | 0          | 0          |
| Taxable Income              | 20,573,986 | 20,549,944 | 21,596,382 | 21,596,382 | 21,596,382 | 21,596,382 | 21,061,257 | 21,596,382 | 21,596,382 | 21,596,382 | 21,596,382 |
| Income Tax                  | 7,200,895  | 7,192,480  | 7,558,734  | 7,558,734  | 7,558,734  | 7,558,734  | 7,371,440  | 7,558,734  | 7,558,734  | 7,558,734  | 7,558,734  |
| Annual Cash Flow            | 14,395,487 | 13,868,776 | 14,037,648 | 14,037,648 | 14,037,648 | 14,037,648 | 13,689,817 | 14,037,648 | 14,037,648 | 14,037,648 | 14,037,648 |
| Discount Factor             | 0.15       | 0.14       | 0.12       | 0.11       | 0.10       | 0.09       | 0.08       | 0.08       | 0.07       | 0.06       | 0.06       |
| Annual Present Value        | 2,139,797  | 1,874,096  | 1,724,469  | 1,567,699  | 1,425,181  | 1,295,619  | 1,148,650  | 1,070,759  | 973,418    | 884,925    | 804,477    |
| TPI + Interest              |            |            |            |            |            |            |            |            |            |            | -575,838   |
| NPV                         |            |            |            |            |            |            |            |            |            |            |            |

**Table S22. Discounted cashflow sheet of biohydrogen production in Brazil**

| Year                        | -2        | -1         | 0           | 1           | 2           | 3           | 4           | 5           | 6           | 7           | 8           |
|-----------------------------|-----------|------------|-------------|-------------|-------------|-------------|-------------|-------------|-------------|-------------|-------------|
| Capital Investment          | 5,409,415 | 40,570,612 | 21,637,660  |             |             |             |             |             |             |             |             |
| Land                        | 1,848,000 |            |             |             |             |             |             |             |             |             |             |
| Working Capital             |           |            | 8,452,211   |             |             |             |             |             |             |             |             |
| Loan Payment                |           |            |             | 11,136,088  | 11,136,088  | 11,136,088  | 11,136,088  | 11,136,088  | 11,136,088  | 11,136,088  | 11,136,088  |
| Loan Interest Payment       | 567,989   | 4,827,903  | 7,099,857   | 7,099,857   | 6,817,321   | 6,515,007   | 6,191,532   | 5,845,413   | 5,475,065   | 5,078,794   | 4,654,783   |
| Loan Principal              | 8,114,122 | 68,970,040 | 101,426,529 | 97,390,299  | 93,071,532  | 88,450,451  | 83,505,895  | 78,215,220  | 72,554,198  | 66,496,904  | 60,015,600  |
| Hydrogen                    |           |            |             | 37,695,198  | 43,080,226  | 43,080,226  | 43,080,226  | 43,080,226  | 43,080,226  | 43,080,226  | 43,080,226  |
| Other sales                 |           |            |             | 2,511,558   | 2,870,352   | 2,870,352   | 2,870,352   | 2,870,352   | 2,870,352   | 2,870,352   | 2,870,352   |
| Total Annual Sales          |           |            |             | 40,206,756  | 45,950,578  | 45,950,578  | 45,950,578  | 45,950,578  | 45,950,578  | 45,950,578  | 45,950,578  |
| Annual Manufacturing Cost   |           |            |             |             |             |             |             |             |             |             |             |
| Raw Material cost           |           |            |             | 13,140,625  | 14,016,667  | 14,016,667  | 14,016,667  | 14,016,667  | 14,016,667  | 14,016,667  | 14,016,667  |
| Utility cost                |           |            |             | 733,671     | 782,583     | 782,583     | 782,583     | 782,583     | 782,583     | 782,583     | 782,583     |
| Baghouse Bags               |           |            |             | 535,125     |             |             |             |             | 535,125     |             |             |
| Fixed Operating Costs       |           |            |             | 8,353,187   | 8,910,066   | 8,910,066   | 8,910,066   | 8,910,066   | 8,910,066   | 8,910,066   | 8,910,066   |
| Total Product Cost          |           |            |             | 22,762,608  | 23,709,315  | 23,709,315  | 23,709,315  | 23,709,315  | 24,244,441  | 23,709,315  | 23,709,315  |
| Annual Depreciation         |           |            |             |             |             |             |             |             |             |             |             |
| <u>General Plant</u>        |           |            |             | 14.29%      | 24.49%      | 17.49%      | 12.49%      | 8.93%       | 8.92%       | 8.93%       | 4.46%       |
| Depreciation Charge         |           |            |             | 20,893,312  | 35,806,663  | 25,572,010  | 18,261,544  | 13,056,492  | 13,041,872  | 13,056,492  | 6,520,936   |
| Remaining Value             |           |            |             | 125,316,010 | 89,509,347  | 63,937,337  | 45,675,792  | 32,619,300  | 19,577,428  | 6,520,936   | 0           |
| <u>Heat and Power Plant</u> |           |            |             | 3.75%       | 7.22%       | 6.68%       | 6.18%       | 5.71%       | 5.29%       | 4.89%       | 4.52%       |
| Depreciation Charge         |           |            |             | 856,308     | 1,648,451   | 1,524,686   | 1,410,511   | 1,304,557   | 1,206,824   | 1,116,170   | 1,032,594   |
| Remaining Value             |           |            |             | 21,978,585  | 20,330,134  | 18,805,448  | 17,394,937  | 16,090,379  | 14,883,555  | 13,767,386  | 12,734,792  |
| Net Revenue                 |           |            |             | -11,405,330 | -22,031,172 | -11,370,440 | -3,622,324  | 2,034,801   | 1,982,377   | 2,989,807   | 10,032,950  |
| Losses Forward              |           |            |             |             | -11,405,330 | -33,436,502 | -44,806,942 | -48,429,266 | -46,394,466 | -44,412,089 | -41,422,282 |
| Taxable Income              |           |            |             | -11,405,330 | -33,436,502 | -44,806,942 | -48,429,266 | -46,394,466 | -44,412,089 | -41,422,282 | -31,389,332 |
| Income Tax                  |           |            |             | 0           | 0           | 0           | 0           | 0           | 0           | 0           | 0           |
| Annual Cash Flow            |           |            |             | 6,308,060   | 11,105,175  | 11,105,175  | 11,105,175  | 11,105,175  | 10,570,050  | 11,105,175  | 11,105,175  |
| Discount Factor             | 1.21      | 1.10       | 1.00        | 0.91        | 0.83        | 0.75        | 0.68        | 0.62        | 0.56        | 0.51        | 0.47        |
| Annual Present Value        |           |            |             | 5,734,600   | 9,177,831   | 8,343,483   | 7,584,984   | 6,895,440   | 5,966,518   | 5,698,711   | 5,180,646   |
| TPI + Interest              | 9,468,738 | 49,938,366 | 37,189,727  |             |             |             |             |             |             |             |             |
| NPV                         |           |            | 0           |             |             |             |             |             |             |             |             |

**Table S22. Discounted cashflow sheet of biohydrogen production in Brazil (continued)**

| Year                      | 9           | 10          | 11         | 12         | 13         | 14         | 15         | 16         | 17         | 18         | 19         |
|---------------------------|-------------|-------------|------------|------------|------------|------------|------------|------------|------------|------------|------------|
| Capital Investment        |             |             |            |            |            |            |            |            |            |            |            |
| Land                      |             |             |            |            |            |            |            |            |            |            |            |
| Working Capital           |             |             |            |            |            |            |            |            |            |            |            |
| Loan Payment              | 11,136,088  | 11,136,088  | 11,136,088 | 11,136,088 | 11,136,088 | 11,136,088 | 11,136,088 | 0          | 0          | 0          | 0          |
| Loan Interest Payment     | 4,201,092   | 3,715,642   | 3,196,211  | 2,640,420  | 2,045,723  | 1,409,397  | 728,529    | 0          | 0          | 0          | 0          |
| Loan Principal            | 53,080,604  | 45,660,158  | 37,720,282 | 29,224,614 | 20,134,249 | 10,407,559 | 0          | 0          | 0          | 0          | 0          |
| Hydrogen                  | 43,080,226  | 43,080,226  | 43,080,226 | 43,080,226 | 43,080,226 | 43,080,226 | 43,080,226 | 43,080,226 | 43,080,226 | 43,080,226 | 43,080,226 |
| Other sales               | 2,870,352   | 2,870,352   | 2,870,352  | 2,870,352  | 2,870,352  | 2,870,352  | 2,870,352  | 2,870,352  | 2,870,352  | 2,870,352  | 2,870,352  |
| Total Annual Sales        | 45,950,578  | 45,950,578  | 45,950,578 | 45,950,578 | 45,950,578 | 45,950,578 | 45,950,578 | 45,950,578 | 45,950,578 | 45,950,578 | 45,950,578 |
| Annual Manufacturing Cost |             |             |            |            |            |            |            |            |            |            |            |
| Raw Material cost         | 14,016,667  | 14,016,667  | 14,016,667 | 14,016,667 | 14,016,667 | 14,016,667 | 14,016,667 | 14,016,667 | 14,016,667 | 14,016,667 | 14,016,667 |
| Utility cost              | 782,583     | 782,583     | 782,583    | 782,583    | 782,583    | 782,583    | 782,583    | 782,583    | 782,583    | 782,583    | 782,583    |
| Baghouse Bags             |             |             | 535,125    |            |            |            |            | 535,125    |            |            |            |
| Fixed Operating Costs     | 8,910,066   | 8,910,066   | 8,910,066  | 8,910,066  | 8,910,066  | 8,910,066  | 8,910,066  | 8,910,066  | 8,910,066  | 8,910,066  | 8,910,066  |
| Total Product Cost        | 23,709,315  | 23,709,315  | 24,244,441 | 23,709,315 | 23,709,315 | 23,709,315 | 23,709,315 | 24,244,441 | 23,709,315 | 23,709,315 | 23,709,315 |
| Annual Depreciation       |             |             |            |            |            |            |            |            |            |            |            |
| General Plant             |             |             |            |            |            |            |            |            |            |            |            |
| Depreciation Charge       |             |             |            |            |            |            |            |            |            |            |            |
| Remaining Value           |             |             |            |            |            |            |            |            |            |            |            |
| Heat and Power Plant      | 4.46%       | 4.46%       | 4.46%      | 4.46%      | 4.46%      | 4.46%      | 4.46%      | 4.46%      | 4.46%      | 4.46%      | 4.46%      |
| Depreciation Charge       | 1,018,893   | 1,018,665   | 1,018,893  | 1,018,665  | 1,018,893  | 1,018,665  | 1,018,893  | 1,018,665  | 1,018,893  | 1,018,665  | 1,018,893  |
| Remaining Value           | 11,715,899  | 10,697,234  | 9,678,341  | 8,659,677  | 7,640,784  | 6,622,119  | 5,603,226  | 4,584,562  | 3,565,669  | 2,547,004  | 1,528,111  |
| Net Revenue               | 17,021,278  | 17,506,956  | 17,491,034 | 18,582,179 | 19,176,647 | 19,813,201 | 20,493,841 | 20,687,473 | 21,222,370 | 21,222,599 | 21,222,370 |
| Losses Forward            | -31,389,332 | -14,368,053 | 0          | 0          | 0          | 0          | 0          | 0          | 0          | 0          | 0          |
| Taxable Income            | -14,368,053 | 3,138,903   | 17,491,034 | 18,582,179 | 19,176,647 | 19,813,201 | 20,493,841 | 20,687,473 | 21,222,370 | 21,222,599 | 21,222,370 |
| Income Tax                | 0           | 1,098,616   | 6,121,862  | 6,503,763  | 6,711,827  | 6,934,620  | 7,172,844  | 7,240,616  | 7,427,830  | 7,427,910  | 7,427,830  |
| Annual Cash Flow          | 11,105,175  | 10,006,559  | 4,448,188  | 4,601,413  | 4,393,349  | 4,170,555  | 3,932,331  | 14,465,522 | 14,813,434 | 14,813,354 | 14,813,434 |
| Discount Factor           | 0.42        | 0.39        | 0.35       | 0.32       | 0.29       | 0.26       | 0.24       | 0.22       | 0.20       | 0.18       | 0.16       |
| Annual Present Value      | 4,709,678   | 3,857,962   | 1,559,063  | 1,466,152  | 1,272,597  | 1,098,237  | 941,369    | 3,148,119  | 2,930,759  | 2,664,312  | 2,422,115  |
| TPI + Interest            |             |             |            |            |            |            |            |            |            |            |            |
| NPV                       |             |             |            |            |            |            |            |            |            |            |            |

**Table S22. Discounted cashflow sheet of biohydrogen production in Brazil (continued)**

| Year                        | 20         | 21         | 22         | 23         | 24         | 25         | 26         | 27         | 28         | 29         | 30         |
|-----------------------------|------------|------------|------------|------------|------------|------------|------------|------------|------------|------------|------------|
| Capital Investment          |            |            |            |            |            |            |            |            |            |            |            |
| Land                        |            |            |            |            |            |            |            |            |            |            | -1,848,000 |
| Working Capital             |            |            |            |            |            |            |            |            |            |            | -8,452,211 |
| Loan Payment                | 0          | 0          | 0          | 0          | 0          | 0          | 0          | 0          | 0          | 0          | 0          |
| Loan Interest Payment       | 0          | 0          | 0          | 0          | 0          | 0          | 0          | 0          | 0          | 0          | 0          |
| Loan Principal              | 0          | 0          | 0          | 0          | 0          | 0          | 0          | 0          | 0          | 0          | 0          |
| Hydrogen                    | 43,080,226 | 43,080,226 | 43,080,226 | 43,080,226 | 43,080,226 | 43,080,226 | 43,080,226 | 43,080,226 | 43,080,226 | 43,080,226 | 43,080,226 |
| Other sales                 | 2,870,352  | 2,870,352  | 2,870,352  | 2,870,352  | 2,870,352  | 2,870,352  | 2,870,352  | 2,870,352  | 2,870,352  | 2,870,352  | 2,870,352  |
| Total Annual Sales          | 45,950,578 | 45,950,578 | 45,950,578 | 45,950,578 | 45,950,578 | 45,950,578 | 45,950,578 | 45,950,578 | 45,950,578 | 45,950,578 | 45,950,578 |
| Annual Manufacturing Cost   |            |            |            |            |            |            |            |            |            |            |            |
| Raw Material cost           | 14,016,667 | 14,016,667 | 14,016,667 | 14,016,667 | 14,016,667 | 14,016,667 | 14,016,667 | 14,016,667 | 14,016,667 | 14,016,667 | 14,016,667 |
| Utility cost                | 782,583    | 782,583    | 782,583    | 782,583    | 782,583    | 782,583    | 782,583    | 782,583    | 782,583    | 782,583    | 782,583    |
| Baghouse Bags               |            | 535,125    |            |            |            |            | 535,125    |            |            |            |            |
| Fixed Operating Costs       | 8,910,066  | 8,910,066  | 8,910,066  | 8,910,066  | 8,910,066  | 8,910,066  | 8,910,066  | 8,910,066  | 8,910,066  | 8,910,066  | 8,910,066  |
| Total Product Cost          | 23,709,315 | 24,244,441 | 23,709,315 | 23,709,315 | 23,709,315 | 23,709,315 | 24,244,441 | 23,709,315 | 23,709,315 | 23,709,315 | 23,709,315 |
| Annual Depreciation         |            |            |            |            |            |            |            |            |            |            |            |
| <u>General Plant</u>        |            |            |            |            |            |            |            |            |            |            |            |
| Depreciation Charge         |            |            |            |            |            |            |            |            |            |            |            |
| Remaining Value             |            |            |            |            |            |            |            |            |            |            |            |
| <u>Heat and Power Plant</u> | 4.46%      | 2.23%      |            |            |            |            |            |            |            |            |            |
| Depreciation Charge         | 1,018,665  | 509,446    |            |            |            |            |            |            |            |            |            |
| Remaining Value             | 509,446    | 0          |            |            |            |            |            |            |            |            |            |
| Net Revenue                 | 21,222,599 | 21,196,691 | 22,241,263 | 22,241,263 | 22,241,263 | 22,241,263 | 21,706,138 | 22,241,263 | 22,241,263 | 22,241,263 | 22,241,263 |
| Losses Forward              | 0          | 0          | 0          | 0          | 0          | 0          | 0          | 0          | 0          | 0          | 0          |
| Taxable Income              | 21,222,599 | 21,196,691 | 22,241,263 | 22,241,263 | 22,241,263 | 22,241,263 | 21,706,138 | 22,241,263 | 22,241,263 | 22,241,263 | 22,241,263 |
| Income Tax                  | 7,427,910  | 7,418,842  | 7,784,442  | 7,784,442  | 7,784,442  | 7,784,442  | 7,597,148  | 7,784,442  | 7,784,442  | 7,784,442  | 7,784,442  |
| Annual Cash Flow            | 14,813,354 | 14,287,296 | 14,456,821 | 14,456,821 | 14,456,821 | 14,456,821 | 14,108,990 | 14,456,821 | 14,456,821 | 14,456,821 | 14,456,821 |
| Discount Factor             | 0.15       | 0.14       | 0.12       | 0.11       | 0.10       | 0.09       | 0.08       | 0.08       | 0.07       | 0.06       | 0.06       |
| Annual Present Value        | 2,201,911  | 1,930,650  | 1,775,962  | 1,614,511  | 1,467,737  | 1,334,307  | 1,183,821  | 1,102,733  | 1,002,484  | 911,349    | 828,500    |
| TPI + Interest              |            |            |            |            |            |            |            |            |            |            | -590,290   |
| NPV                         |            |            |            |            |            |            |            |            |            |            |            |

**Table S23. Discounted cashflow sheet of bioelectricity production in China**

| Year                        | -2        | -1         | 0          | 1          | 2           | 3           | 4           | 5           | 6           | 7           | 8           |
|-----------------------------|-----------|------------|------------|------------|-------------|-------------|-------------|-------------|-------------|-------------|-------------|
| Capital Investment          | 3,525,434 | 26,440,757 | 14,101,737 |            |             |             |             |             |             |             |             |
| Land                        | 1,848,000 |            |            |            |             |             |             |             |             |             |             |
| Working Capital             |           |            | 5,508,491  |            |             |             |             |             |             |             |             |
| Loan Payment                |           |            |            | 7,257,632  | 7,257,632   | 7,257,632   | 7,257,632   | 7,257,632   | 7,257,632   | 7,257,632   | 7,257,632   |
| Loan Interest Payment       | 370,171   | 3,146,450  | 4,627,132  | 4,627,132  | 4,442,997   | 4,245,973   | 4,035,157   | 3,809,584   | 3,568,220   | 3,309,961   | 3,033,624   |
| Loan Principal              | 5,288,151 | 44,949,286 | 66,101,891 | 63,471,391 | 60,656,756  | 57,645,097  | 54,422,621  | 50,974,573  | 47,285,160  | 43,337,489  | 39,113,481  |
| Electricity                 |           |            |            | 30,520,442 | 34,880,505  | 34,880,505  | 34,880,505  | 34,880,505  | 34,880,505  | 34,880,505  | 34,880,505  |
| Other sales                 |           |            |            | 1,546,439  | 1,767,359   | 1,767,359   | 1,767,359   | 1,767,359   | 1,767,359   | 1,767,359   | 1,767,359   |
| Total Annual Sales          |           |            |            | 32,066,882 | 36,647,865  | 36,647,865  | 36,647,865  | 36,647,865  | 36,647,865  | 36,647,865  | 36,647,865  |
| Annual Manufacturing Cost   |           |            |            | 13,443,389 |             |             |             |             |             |             |             |
| Raw Material cost           |           |            |            | 13,140,625 | 14,016,667  | 14,016,667  | 14,016,667  | 14,016,667  | 14,016,667  | 14,016,667  | 14,016,667  |
| Utility cost                |           |            |            | 302,764    | 322,948     | 322,948     | 322,948     | 322,948     | 322,948     | 322,948     | 322,948     |
| Baghouse Bags               |           |            |            | 535,125    |             |             |             |             | 535,125     |             |             |
| Fixed Operating Costs       |           |            |            | 7,115,286  | 7,589,639   | 7,589,639   | 7,589,639   | 7,589,639   | 7,589,639   | 7,589,639   | 7,589,639   |
| Total Product Cost          |           |            |            | 21,093,801 | 21,929,254  | 21,929,254  | 21,929,254  | 21,929,254  | 22,464,379  | 21,929,254  | 21,929,254  |
| Annual Depreciation         |           |            |            |            |             |             |             |             |             |             |             |
| <u>General Plant</u>        |           |            |            | 14%        | 24%         | 17%         | 12%         | 9%          | 9%          | 9%          | 4%          |
| Depreciation Charge         |           |            |            | 12,754,125 | 21,857,840  | 15,610,193  | 11,147,588  | 7,970,213   | 7,961,288   | 7,970,213   | 3,980,644   |
| Remaining Value             |           |            |            | 76,497,977 | 54,640,137  | 39,029,944  | 27,882,357  | 19,912,144  | 11,950,857  | 3,980,644   | 0           |
| <u>Heat and Power Plant</u> |           |            |            | 3.75%      | 7.22%       | 6.68%       | 6.18%       | 5.71%       | 5.29%       | 4.89%       | 4.52%       |
| Depreciation Charge         |           |            |            | 784,414    | 1,510,050   | 1,396,676   | 1,292,087   | 1,195,029   | 1,105,501   | 1,022,458   | 945,899     |
| Remaining Value             |           |            |            | 20,133,302 | 18,623,252  | 17,226,576  | 15,934,489  | 14,739,460  | 13,633,958  | 12,611,500  | 11,665,601  |
| Net Revenue                 |           |            |            | -7,192,591 | -13,092,276 | -6,534,230  | -1,756,221  | 1,743,786   | 1,548,477   | 2,415,979   | 6,758,444   |
| Losses Forward              |           |            |            |            | -7,192,591  | -20,284,867 | -26,819,098 | -28,575,318 | -26,831,532 | -25,283,056 | -22,867,076 |
| Taxable Income              |           |            |            | -7,192,591 | -20,284,867 | -26,819,098 | -28,575,318 | -26,831,532 | -25,283,056 | -22,867,076 | -16,108,632 |
| Income Tax                  |           |            |            | 0          | 0           | 0           | 0           | 0           | 0           | 0           | 0           |
| Annual Cash Flow            |           |            |            | 3,715,449  | 7,460,979   | 7,460,979   | 7,460,979   | 7,460,979   | 6,925,853   | 7,460,979   | 7,460,979   |
| Discount Factor             | 1.21      | 1.10       | 1.00       | 0.91       | 0.83        | 0.75        | 0.68        | 0.62        | 0.56        | 0.51        | 0.47        |
| Annual Present Value        |           |            |            | 3,377,681  | 6,166,098   | 5,605,544   | 5,095,949   | 4,632,681   | 3,909,464   | 3,828,662   | 3,480,602   |
| TPI + Interest              | 6,949,762 | 32,545,927 | 24,237,360 |            |             |             |             |             |             |             |             |
| NPV                         |           |            | 0          |            |             |             |             |             |             |             |             |

**Table S23. Discounted cashflow sheet of bioelectricity production in China (continued)**

| Year                      | 9           | 10         | 11         | 12         | 13         | 14         | 15         | 16         | 17         | 18         | 19         |
|---------------------------|-------------|------------|------------|------------|------------|------------|------------|------------|------------|------------|------------|
| Capital Investment        |             |            |            |            |            |            |            |            |            |            |            |
| Land                      |             |            |            |            |            |            |            |            |            |            |            |
| Working Capital           |             |            |            |            |            |            |            |            |            |            |            |
| Loan Payment              | 7,257,632   | 7,257,632  | 7,257,632  | 7,257,632  | 7,257,632  | 7,257,632  | 7,257,632  | 0          | 0          | 0          | 0          |
| Loan Interest Payment     | 2,737,944   | 2,421,565  | 2,083,041  | 1,720,819  | 1,333,242  | 918,535    | 474,798    | 0          | 0          | 0          | 0          |
| Loan Principal            | 34,593,792  | 29,757,726 | 24,583,134 | 19,046,321 | 13,121,931 | 6,782,834  | 0          | 0          | 0          | 0          | 0          |
| Electricity               | 34,880,505  | 34,880,505 | 34,880,505 | 34,880,505 | 34,880,505 | 34,880,505 | 34,880,505 | 34,880,505 | 34,880,505 | 34,880,505 | 34,880,505 |
| Other sales               | 1,767,359   | 1,767,359  | 1,767,359  | 1,767,359  | 1,767,359  | 1,767,359  | 1,767,359  | 1,767,359  | 1,767,359  | 1,767,359  | 1,767,359  |
| Total Annual Sales        | 36,647,865  | 36,647,865 | 36,647,865 | 36,647,865 | 36,647,865 | 36,647,865 | 36,647,865 | 36,647,865 | 36,647,865 | 36,647,865 | 36,647,865 |
| Annual Manufacturing Cost |             |            |            |            |            |            |            |            |            |            |            |
| Raw Material cost         | 14,016,667  | 14,016,667 | 14,016,667 | 14,016,667 | 14,016,667 | 14,016,667 | 14,016,667 | 14,016,667 | 14,016,667 | 14,016,667 | 14,016,667 |
| Utility cost              | 322,948     | 322,948    | 322,948    | 322,948    | 322,948    | 322,948    | 322,948    | 322,948    | 322,948    | 322,948    | 322,948    |
| Baghouse Bags             |             |            | 535,125    |            |            |            |            | 535,125    |            |            |            |
| Fixed Operating Costs     | 7,589,639   | 7,589,639  | 7,589,639  | 7,589,639  | 7,589,639  | 7,589,639  | 7,589,639  | 7,589,639  | 7,589,639  | 7,589,639  | 7,589,639  |
| Total Product Cost        | 21,929,254  | 21,929,254 | 22,464,379 | 21,929,254 | 21,929,254 | 21,929,254 | 21,929,254 | 22,464,379 | 21,929,254 | 21,929,254 | 21,929,254 |
| Annual Depreciation       |             |            |            |            |            |            |            |            |            |            |            |
| General Plant             |             |            |            |            |            |            |            |            |            |            |            |
| Depreciation Charge       |             |            |            |            |            |            |            |            |            |            |            |
| Remaining Value           |             |            |            |            |            |            |            |            |            |            |            |
| Heat and Power Plant      | 4.46%       | 4.46%      | 4.46%      | 4.46%      | 4.46%      | 4.46%      | 4.46%      | 4.46%      | 4.46%      | 4.46%      | 4.46%      |
| Depreciation Charge       | 933,349     | 933,139    | 933,349    | 933,139    | 933,349    | 933,139    | 933,349    | 933,139    | 933,349    | 933,139    | 933,349    |
| Remaining Value           | 10,732,253  | 9,799,113  | 8,865,765  | 7,932,626  | 6,999,277  | 6,066,138  | 5,132,789  | 4,199,650  | 3,266,301  | 2,333,162  | 1,399,814  |
| Net Revenue               | 11,047,319  | 11,363,906 | 11,167,096 | 12,064,652 | 12,452,020 | 12,866,937 | 13,310,464 | 13,250,346 | 13,785,263 | 13,785,472 | 13,785,263 |
| Losses Forward            | -16,108,632 | -5,061,313 | 0          | 0          | 0          | 0          | 0          | 0          | 0          | 0          | 0          |
| Taxable Income            | -5,061,313  | 6,302,593  | 11,167,096 | 12,064,652 | 12,452,020 | 12,866,937 | 13,310,464 | 13,250,346 | 13,785,263 | 13,785,472 | 13,785,263 |
| Income Tax                | 0           | 2,205,908  | 3,908,484  | 4,222,628  | 4,358,207  | 4,503,428  | 4,658,663  | 4,637,621  | 4,824,842  | 4,824,915  | 4,824,842  |
| Annual Cash Flow          | 7,460,979   | 5,255,071  | 3,017,370  | 3,238,350  | 3,102,772  | 2,957,551  | 2,802,316  | 9,545,865  | 9,893,769  | 9,893,696  | 9,893,769  |
| Discount Factor           | 0.42        | 0.39       | 0.35       | 0.32       | 0.29       | 0.26       | 0.24       | 0.22       | 0.20       | 0.18       | 0.16       |
| Annual Present Value      | 3,164,183   | 2,026,057  | 1,057,570  | 1,031,838  | 898,762    | 778,816    | 670,852    | 2,077,458  | 1,957,430  | 1,779,468  | 1,617,710  |
| TPI + Interest            |             |            |            |            |            |            |            |            |            |            |            |
| NPV                       |             |            |            |            |            |            |            |            |            |            |            |



**Table S23. Discounted cashflow sheet of bioelectricity production in China (continued)**

| Year                        | 20         | 21         | 22         | 23         | 24         | 25         | 26         | 27         | 28         | 29         | 30         |
|-----------------------------|------------|------------|------------|------------|------------|------------|------------|------------|------------|------------|------------|
| Capital Investment          |            |            |            |            |            |            |            |            |            |            |            |
| Land                        |            |            |            |            |            |            |            |            |            |            | -1,848,000 |
| Working Capital             |            |            |            |            |            |            |            |            |            |            | -5,508,491 |
| Loan Payment                | 0          | 0          | 0          | 0          | 0          | 0          | 0          | 0          | 0          | 0          | 0          |
| Loan Interest Payment       | 0          | 0          | 0          | 0          | 0          | 0          | 0          | 0          | 0          | 0          | 0          |
| Loan Principal              | 0          | 0          | 0          | 0          | 0          | 0          | 0          | 0          | 0          | 0          | 0          |
| Electricity                 | 34,880,505 | 34,880,505 | 34,880,505 | 34,880,505 | 34,880,505 | 34,880,505 | 34,880,505 | 34,880,505 | 34,880,505 | 34,880,505 | 34,880,505 |
| Other sales                 | 1,767,359  | 1,767,359  | 1,767,359  | 1,767,359  | 1,767,359  | 1,767,359  | 1,767,359  | 1,767,359  | 1,767,359  | 1,767,359  | 1,767,359  |
| Total Annual Sales          | 36,647,865 | 36,647,865 | 36,647,865 | 36,647,865 | 36,647,865 | 36,647,865 | 36,647,865 | 36,647,865 | 36,647,865 | 36,647,865 | 36,647,865 |
| Annual Manufacturing Cost   |            |            |            |            |            |            |            |            |            |            |            |
| Raw Material cost           | 14,016,667 | 14,016,667 | 14,016,667 | 14,016,667 | 14,016,667 | 14,016,667 | 14,016,667 | 14,016,667 | 14,016,667 | 14,016,667 | 14,016,667 |
| Utility cost                | 322,948    | 322,948    | 322,948    | 322,948    | 322,948    | 322,948    | 322,948    | 322,948    | 322,948    | 322,948    | 322,948    |
| Baghouse Bags               |            | 535,125    |            |            |            |            | 535,125    |            |            |            |            |
| Fixed Operating Costs       | 7,589,639  | 7,589,639  | 7,589,639  | 7,589,639  | 7,589,639  | 7,589,639  | 7,589,639  | 7,589,639  | 7,589,639  | 7,589,639  | 7,589,639  |
| Total Product Cost          | 21,929,254 | 22,464,379 | 21,929,254 | 21,929,254 | 21,929,254 | 21,929,254 | 22,464,379 | 21,929,254 | 21,929,254 | 21,929,254 | 21,929,254 |
| Annual Depreciation         |            |            |            |            |            |            |            |            |            |            |            |
| <u>General Plant</u>        |            |            |            |            |            |            |            |            |            |            |            |
| Depreciation Charge         |            |            |            |            |            |            |            |            |            |            |            |
| Remaining Value             |            |            |            |            |            |            |            |            |            |            |            |
| <u>Heat and Power Plant</u> | 4.46%      | 2.23%      |            |            |            |            |            |            |            |            |            |
| Depreciation Charge         | 933,139    | 466,674    |            |            |            |            |            |            |            |            |            |
| Remaining Value             | 466,674    | 0          |            |            |            |            |            |            |            |            |            |
| Net Revenue                 | 13,785,472 | 13,716,812 | 14,718,611 | 14,718,611 | 14,718,611 | 14,718,611 | 14,183,486 | 14,718,611 | 14,718,611 | 14,718,611 | 14,718,611 |
| Losses Forward              | 0          | 0          | 0          | 0          | 0          | 0          | 0          | 0          | 0          | 0          | 0          |
| Taxable Income              | 13,785,472 | 13,716,812 | 14,718,611 | 14,718,611 | 14,718,611 | 14,718,611 | 14,183,486 | 14,718,611 | 14,718,611 | 14,718,611 | 14,718,611 |
| Income Tax                  | 4,824,915  | 4,800,884  | 5,151,514  | 5,151,514  | 5,151,514  | 5,151,514  | 4,964,220  | 5,151,514  | 5,151,514  | 5,151,514  | 5,151,514  |
| Annual Cash Flow            | 9,893,696  | 9,382,602  | 9,567,097  | 9,567,097  | 9,567,097  | 9,567,097  | 9,219,266  | 9,567,097  | 9,567,097  | 9,567,097  | 9,567,097  |
| Discount Factor             | 0.15       | 0.14       | 0.12       | 0.11       | 0.10       | 0.09       | 0.08       | 0.08       | 0.07       | 0.06       | 0.06       |
| Annual Present Value        | 1,470,635  | 1,267,876  | 1,175,279  | 1,068,436  | 971,305    | 883,005    | 773,547    | 729,756    | 663,415    | 603,104    | 548,277    |
| TPI + Interest              |            |            |            |            |            |            |            |            |            |            | -421,590   |
| NPV                         |            |            |            |            |            |            |            |            |            |            |            |

**Table S24. Discounted cashflow sheet of bioelectricity production in India**

| Year                        | -2        | -1         | 0          | 1          | 2           | 3           | 4           | 5           | 6           | 7           | 8           |
|-----------------------------|-----------|------------|------------|------------|-------------|-------------|-------------|-------------|-------------|-------------|-------------|
| Capital Investment          | 4,098,693 | 30,740,200 | 16,394,773 |            |             |             |             |             |             |             |             |
| Land                        | 1,848,000 |            |            |            |             |             |             |             |             |             |             |
| Working Capital             |           |            | 6,404,208  |            |             |             |             |             |             |             |             |
| Loan Payment                |           |            |            | 8,437,772  | 8,437,772   | 8,437,772   | 8,437,772   | 8,437,772   | 8,437,772   | 8,437,772   | 8,437,772   |
| Loan Interest Payment       | 430,363   | 3,658,084  | 5,379,535  | 5,379,535  | 5,165,458   | 4,936,396   | 4,691,300   | 4,429,047   | 4,148,436   | 3,848,183   | 3,526,912   |
| Loan Principal              | 6,148,040 | 52,258,340 | 76,850,500 | 73,792,263 | 70,519,950  | 67,018,574  | 63,272,103  | 59,263,378  | 54,974,043  | 50,384,454  | 45,473,594  |
| Electricity                 |           |            |            | 32,584,008 | 37,238,867  | 37,238,867  | 37,238,867  | 37,238,867  | 37,238,867  | 37,238,867  | 37,238,867  |
| Other sales                 |           |            |            | 1,878,355  | 2,146,691   | 2,146,691   | 2,146,691   | 2,146,691   | 2,146,691   | 2,146,691   | 2,146,691   |
| Total Annual Sales          |           |            |            | 34,462,363 | 39,385,558  | 39,385,558  | 39,385,558  | 39,385,558  | 39,385,558  | 39,385,558  | 39,385,558  |
| Annual Manufacturing Cost   |           |            |            | 13,525,434 |             |             |             |             |             |             |             |
| Raw Material cost           |           |            |            | 13,140,625 | 14,016,667  | 14,016,667  | 14,016,667  | 14,016,667  | 14,016,667  | 14,016,667  | 14,016,667  |
| Utility cost                |           |            |            | 384,809    | 410,463     | 410,463     | 410,463     | 410,463     | 410,463     | 410,463     | 410,463     |
| Baghouse Bags               |           |            |            | 535,125    |             |             |             |             | 535,125     |             |             |
| Fixed Operating Costs       |           |            |            | 7,443,319  | 7,939,540   | 7,939,540   | 7,939,540   | 7,939,540   | 7,939,540   | 7,939,540   | 7,939,540   |
| Total Product Cost          |           |            |            | 21,503,878 | 22,366,670  | 22,366,670  | 22,366,670  | 22,366,670  | 22,901,795  | 22,366,670  | 22,366,670  |
| Annual Depreciation         |           |            |            |            |             |             |             |             |             |             |             |
| <u>General Plant</u>        |           |            |            | 14%        | 24%         | 17%         | 12%         | 9%          | 9%          | 9%          | 4%          |
| Depreciation Charge         |           |            |            | 14,764,548 | 25,303,274  | 18,070,815  | 12,904,773  | 9,226,551   | 9,216,219   | 9,226,551   | 4,608,109   |
| Remaining Value             |           |            |            | 88,556,292 | 63,253,018  | 45,182,203  | 32,277,430  | 23,050,879  | 13,834,660  | 4,608,109   | 0           |
| <u>Heat and Power Plant</u> |           |            |            | 3.75%      | 7.22%       | 6.68%       | 6.18%       | 5.71%       | 5.29%       | 4.89%       | 4.52%       |
| Depreciation Charge         |           |            |            | 928,625    | 1,787,665   | 1,653,447   | 1,529,631   | 1,414,729   | 1,308,742   | 1,210,431   | 1,119,798   |
| Remaining Value             |           |            |            | 23,834,702 | 22,047,037  | 20,393,590  | 18,863,959  | 17,449,230  | 16,140,488  | 14,930,057  | 13,810,259  |
| Net Revenue                 |           |            |            | -8,114,223 | -15,237,508 | -7,641,770  | -2,106,815  | 1,948,561   | 1,810,366   | 2,733,723   | 7,764,070   |
| Losses Forward              |           |            |            |            | -8,114,223  | -23,351,731 | -30,993,501 | -33,100,317 | -31,151,755 | -29,341,390 | -26,607,667 |
| Taxable Income              |           |            |            | -8,114,223 | -23,351,731 | -30,993,501 | -33,100,317 | -31,151,755 | -29,341,390 | -26,607,667 | -18,843,597 |
| Income Tax                  |           |            |            | 0          | 0           | 0           | 0           | 0           | 0           | 0           | 0           |
| Annual Cash Flow            |           |            |            | 4,520,713  | 8,581,117   | 8,581,117   | 8,581,117   | 8,581,117   | 8,045,991   | 8,581,117   | 8,581,117   |
| Discount Factor             | 1.21      | 1.10       | 1.00       | 0.91       | 0.83        | 0.75        | 0.68        | 0.62        | 0.56        | 0.51        | 0.47        |
| Annual Present Value        |           |            |            | 4,109,739  | 7,091,832   | 6,447,120   | 5,861,018   | 5,328,198   | 4,541,752   | 4,403,470   | 4,003,154   |
| TPI + Interest              | 7,716,238 | 37,838,112 | 28,178,517 |            |             |             |             |             |             |             |             |
| NPV                         |           |            | 0          |            |             |             |             |             |             |             |             |

**Table S24. Discounted cashflow sheet of bioelectricity production in India (continued)**

| Year                      | 9           | 10         | 11         | 12         | 13         | 14         | 15         | 16         | 17         | 18         | 19         |
|---------------------------|-------------|------------|------------|------------|------------|------------|------------|------------|------------|------------|------------|
| Capital Investment        |             |            |            |            |            |            |            |            |            |            |            |
| Land                      |             |            |            |            |            |            |            |            |            |            |            |
| Working Capital           |             |            |            |            |            |            |            |            |            |            |            |
| Loan Payment              | 8,437,772   | 8,437,772  | 8,437,772  | 8,437,772  | 8,437,772  | 8,437,772  | 8,437,772  | 0          | 0          | 0          | 0          |
| Loan Interest Payment     | 3,183,152   | 2,815,328  | 2,421,757  | 2,000,636  | 1,550,037  | 1,067,895  | 552,004    | 0          | 0          | 0          | 0          |
| Loan Principal            | 40,218,974  | 34,596,530 | 28,580,516 | 22,143,380 | 15,255,645 | 7,885,768  | 0          | 0          | 0          | 0          | 0          |
| Electricity               | 37,238,867  | 37,238,867 | 37,238,867 | 37,238,867 | 37,238,867 | 37,238,867 | 37,238,867 | 37,238,867 | 37,238,867 | 37,238,867 | 37,238,867 |
| Other sales               | 2,146,691   | 2,146,691  | 2,146,691  | 2,146,691  | 2,146,691  | 2,146,691  | 2,146,691  | 2,146,691  | 2,146,691  | 2,146,691  | 2,146,691  |
| Total Annual Sales        | 39,385,558  | 39,385,558 | 39,385,558 | 39,385,558 | 39,385,558 | 39,385,558 | 39,385,558 | 39,385,558 | 39,385,558 | 39,385,558 | 39,385,558 |
| Annual Manufacturing Cost |             |            |            |            |            |            |            |            |            |            |            |
| Raw Material cost         | 14,016,667  | 14,016,667 | 14,016,667 | 14,016,667 | 14,016,667 | 14,016,667 | 14,016,667 | 14,016,667 | 14,016,667 | 14,016,667 | 14,016,667 |
| Utility cost              | 410,463     | 410,463    | 410,463    | 410,463    | 410,463    | 410,463    | 410,463    | 410,463    | 410,463    | 410,463    | 410,463    |
| Baghouse Bags             |             |            | 535,125    |            |            |            |            | 535,125    |            |            |            |
| Fixed Operating Costs     | 7,939,540   | 7,939,540  | 7,939,540  | 7,939,540  | 7,939,540  | 7,939,540  | 7,939,540  | 7,939,540  | 7,939,540  | 7,939,540  | 7,939,540  |
| Total Product Cost        | 22,366,670  | 22,366,670 | 22,901,795 | 22,366,670 | 22,366,670 | 22,366,670 | 22,366,670 | 22,901,795 | 22,366,670 | 22,366,670 | 22,366,670 |
| Annual Depreciation       |             |            |            |            |            |            |            |            |            |            |            |
| General Plant             |             |            |            |            |            |            |            |            |            |            |            |
| Depreciation Charge       |             |            |            |            |            |            |            |            |            |            |            |
| Remaining Value           |             |            |            |            |            |            |            |            |            |            |            |
| Heat and Power Plant      | 4.46%       | 4.46%      | 4.46%      | 4.46%      | 4.46%      | 4.46%      | 4.46%      | 4.46%      | 4.46%      | 4.46%      | 4.46%      |
| Depreciation Charge       | 1,104,940   | 1,104,692  | 1,104,940  | 1,104,692  | 1,104,940  | 1,104,692  | 1,104,940  | 1,104,692  | 1,104,940  | 1,104,692  | 1,104,940  |
| Remaining Value           | 12,705,320  | 11,600,628 | 10,495,688 | 9,390,996  | 8,286,057  | 7,181,365  | 6,076,425  | 4,971,733  | 3,866,793  | 2,762,101  | 1,657,162  |
| Net Revenue               | 12,730,797  | 13,098,868 | 12,957,066 | 13,913,560 | 14,363,912 | 14,846,301 | 15,361,945 | 15,379,071 | 15,913,949 | 15,914,196 | 15,913,949 |
| Losses Forward            | -18,843,597 | -6,112,800 | 0          | 0          | 0          | 0          | 0          | 0          | 0          | 0          | 0          |
| Taxable Income            | -6,112,800  | 6,986,068  | 12,957,066 | 13,913,560 | 14,363,912 | 14,846,301 | 15,361,945 | 15,379,071 | 15,913,949 | 15,914,196 | 15,913,949 |
| Income Tax                | 0           | 2,445,124  | 4,534,973  | 4,869,746  | 5,027,369  | 5,196,205  | 5,376,681  | 5,382,675  | 5,569,882  | 5,569,969  | 5,569,882  |
| Annual Cash Flow          | 8,581,117   | 6,135,993  | 3,511,018  | 3,711,370  | 3,553,747  | 3,384,911  | 3,204,436  | 11,101,088 | 11,449,006 | 11,448,920 | 11,449,006 |
| Discount Factor           | 0.42        | 0.39       | 0.35       | 0.32       | 0.29       | 0.26       | 0.24       | 0.22       | 0.20       | 0.18       | 0.16       |
| Annual Present Value      | 3,639,231   | 2,365,691  | 1,230,590  | 1,182,557  | 1,029,394  | 891,353    | 767,116    | 2,415,920  | 2,265,125  | 2,059,189  | 1,872,004  |
| TPI + Interest            |             |            |            |            |            |            |            |            |            |            |            |
| NPV                       |             |            |            |            |            |            |            |            |            |            |            |

**Table S24. Discounted cashflow sheet of bioelectricity production in India (continued)**

| Year                        | 20         | 21         | 22         | 23         | 24         | 25         | 26         | 27         | 28         | 29         | 30         |
|-----------------------------|------------|------------|------------|------------|------------|------------|------------|------------|------------|------------|------------|
| Capital Investment          |            |            |            |            |            |            |            |            |            |            |            |
| Land                        |            |            |            |            |            |            |            |            |            |            | -1,848,000 |
| Working Capital             |            |            |            |            |            |            |            |            |            |            | -6,404,208 |
| Loan Payment                | 0          | 0          | 0          | 0          | 0          | 0          | 0          | 0          | 0          | 0          | 0          |
| Loan Interest Payment       | 0          | 0          | 0          | 0          | 0          | 0          | 0          | 0          | 0          | 0          | 0          |
| Loan Principal              | 0          | 0          | 0          | 0          | 0          | 0          | 0          | 0          | 0          | 0          | 0          |
| Electricity                 | 37,238,867 | 37,238,867 | 37,238,867 | 37,238,867 | 37,238,867 | 37,238,867 | 37,238,867 | 37,238,867 | 37,238,867 | 37,238,867 | 37,238,867 |
| Other sales                 | 2,146,691  | 2,146,691  | 2,146,691  | 2,146,691  | 2,146,691  | 2,146,691  | 2,146,691  | 2,146,691  | 2,146,691  | 2,146,691  | 2,146,691  |
| Total Annual Sales          | 39,385,558 | 39,385,558 | 39,385,558 | 39,385,558 | 39,385,558 | 39,385,558 | 39,385,558 | 39,385,558 | 39,385,558 | 39,385,558 | 39,385,558 |
| Annual Manufacturing Cost   |            |            |            |            |            |            |            |            |            |            |            |
| Raw Material cost           | 14,016,667 | 14,016,667 | 14,016,667 | 14,016,667 | 14,016,667 | 14,016,667 | 14,016,667 | 14,016,667 | 14,016,667 | 14,016,667 | 14,016,667 |
| Utility cost                | 410,463    | 410,463    | 410,463    | 410,463    | 410,463    | 410,463    | 410,463    | 410,463    | 410,463    | 410,463    | 410,463    |
| Baghouse Bags               |            | 535,125    |            |            |            |            | 535,125    |            |            |            |            |
| Fixed Operating Costs       | 7,939,540  | 7,939,540  | 7,939,540  | 7,939,540  | 7,939,540  | 7,939,540  | 7,939,540  | 7,939,540  | 7,939,540  | 7,939,540  | 7,939,540  |
| Total Product Cost          | 22,366,670 | 22,901,795 | 22,366,670 | 22,366,670 | 22,366,670 | 22,366,670 | 22,901,795 | 22,366,670 | 22,366,670 | 22,366,670 | 22,366,670 |
| Annual Depreciation         |            |            |            |            |            |            |            |            |            |            |            |
| <u>General Plant</u>        |            |            |            |            |            |            |            |            |            |            |            |
| Depreciation Charge         |            |            |            |            |            |            |            |            |            |            |            |
| Remaining Value             |            |            |            |            |            |            |            |            |            |            |            |
| <u>Heat and Power Plant</u> | 4.46%      | 2.23%      |            |            |            |            |            |            |            |            |            |
| Depreciation Charge         | 1,104,692  | 552,470    |            |            |            |            |            |            |            |            |            |
| Remaining Value             | 552,470    | 0          |            |            |            |            |            |            |            |            |            |
| Net Revenue                 | 15,914,196 | 15,931,293 | 17,018,888 | 17,018,888 | 17,018,888 | 17,018,888 | 16,483,763 | 17,018,888 | 17,018,888 | 17,018,888 | 17,018,888 |
| Losses Forward              | 0          | 0          | 0          | 0          | 0          | 0          | 0          | 0          | 0          | 0          | 0          |
| Taxable Income              | 15,914,196 | 15,931,293 | 17,018,888 | 17,018,888 | 17,018,888 | 17,018,888 | 16,483,763 | 17,018,888 | 17,018,888 | 17,018,888 | 17,018,888 |
| Income Tax                  | 5,569,969  | 5,575,953  | 5,956,611  | 5,956,611  | 5,956,611  | 5,956,611  | 5,769,317  | 5,956,611  | 5,956,611  | 5,956,611  | 5,956,611  |
| Annual Cash Flow            | 11,448,920 | 10,907,810 | 11,062,277 | 11,062,277 | 11,062,277 | 11,062,277 | 10,714,446 | 11,062,277 | 11,062,277 | 11,062,277 | 11,062,277 |
| Discount Factor             | 0.15       | 0.14       | 0.12       | 0.11       | 0.10       | 0.09       | 0.08       | 0.08       | 0.07       | 0.06       | 0.06       |
| Annual Present Value        | 1,701,809  | 1,473,979  | 1,358,956  | 1,235,415  | 1,123,104  | 1,021,004  | 899,000    | 843,805    | 767,095    | 697,359    | 633,963    |
| TPI + Interest              |            |            |            |            |            |            |            |            |            |            | -472,922   |
| NPV                         |            |            |            |            |            |            |            |            |            |            |            |

**Table S25. Discounted cashflow sheet of bioelectricity production in USA**

| Year                        | -2        | -1         | 0          | 1          | 2           | 3           | 4           | 5           | 6           | 7           | 8           |
|-----------------------------|-----------|------------|------------|------------|-------------|-------------|-------------|-------------|-------------|-------------|-------------|
| Capital Investment          | 4,434,517 | 33,258,876 | 17,738,067 |            |             |             |             |             |             |             |             |
| Land                        | 1,848,000 |            |            |            |             |             |             |             |             |             |             |
| Working Capital             |           |            | 6,928,933  |            |             |             |             |             |             |             |             |
| Loan Payment                |           |            |            | 9,129,115  | 9,129,115   | 9,129,115   | 9,129,115   | 9,129,115   | 9,129,115   | 9,129,115   | 9,129,115   |
| Loan Interest Payment       | 465,624   | 3,957,806  | 5,820,303  | 5,820,303  | 5,588,687   | 5,340,857   | 5,075,679   | 4,791,938   | 4,488,336   | 4,163,481   | 3,815,887   |
| Loan Principal              | 6,651,775 | 56,540,090 | 83,147,191 | 79,838,380 | 76,297,952  | 72,509,694  | 68,456,258  | 64,119,081  | 59,478,302  | 54,512,669  | 49,199,441  |
| Electricity                 |           |            |            | 33,591,165 | 38,389,903  | 38,389,903  | 38,389,903  | 38,389,903  | 38,389,903  | 38,389,903  | 38,389,903  |
| Other sales                 |           |            |            | 2,290,488  | 2,617,701   | 2,617,701   | 2,617,701   | 2,617,701   | 2,617,701   | 2,617,701   | 2,617,701   |
| Total Annual Sales          |           |            |            | 35,881,653 | 41,007,603  | 41,007,603  | 41,007,603  | 41,007,603  | 41,007,603  | 41,007,603  | 41,007,603  |
| Annual Manufacturing Cost   |           |            |            | 13,580,549 |             |             |             |             |             |             |             |
| Raw Material cost           |           |            |            | 13,140,625 | 14,016,667  | 14,016,667  | 14,016,667  | 14,016,667  | 14,016,667  | 14,016,667  | 14,016,667  |
| Utility cost                |           |            |            | 439,924    | 469,252     | 469,252     | 469,252     | 469,252     | 469,252     | 469,252     | 469,252     |
| Baghouse Bags               |           |            |            | 535,125    |             |             |             | 535,125     |             |             |             |
| Fixed Operating Costs       |           |            |            | 7,648,395  | 8,158,288   | 8,158,288   | 8,158,288   | 8,158,288   | 8,158,288   | 8,158,288   | 8,158,288   |
| Total Product Cost          |           |            |            | 21,764,069 | 22,644,207  | 22,644,207  | 22,644,207  | 22,644,207  | 23,179,332  | 22,644,207  | 22,644,207  |
| Annual Depreciation         |           |            |            |            |             |             |             |             |             |             |             |
| <u>General Plant</u>        |           |            |            | 14%        | 24%         | 17%         | 12%         | 9%          | 9%          | 9%          | 4%          |
| Depreciation Charge         |           |            |            | 16,065,597 | 27,532,993  | 19,663,211  | 14,041,939  | 10,039,593  | 10,028,350  | 10,039,593  | 5,014,175   |
| Remaining Value             |           |            |            | 96,359,853 | 68,826,861  | 49,163,649  | 35,121,711  | 25,082,118  | 15,053,768  | 5,014,175   | 0           |
| <u>Heat and Power Plant</u> |           |            |            | 3.75%      | 7.22%       | 6.68%       | 6.18%       | 5.71%       | 5.29%       | 4.89%       | 4.52%       |
| Depreciation Charge         |           |            |            | 980,745    | 1,888,000   | 1,746,249   | 1,615,483   | 1,494,132   | 1,382,197   | 1,278,369   | 1,182,648   |
| Remaining Value             |           |            |            | 25,172,457 | 23,284,457  | 21,538,208  | 19,922,725  | 18,428,592  | 17,046,395  | 15,768,027  | 14,585,379  |
| Net Revenue                 |           |            |            | -8,749,062 | -16,646,283 | -8,386,921  | -2,369,704  | 2,037,733   | 1,929,388   | 2,881,954   | 8,350,687   |
| Losses Forward              |           |            |            |            | -8,749,062  | -25,395,344 | -33,782,265 | -36,151,969 | -34,114,236 | -32,184,848 | -29,302,894 |
| Taxable Income              |           |            |            | -8,749,062 | -25,395,344 | -33,782,265 | -36,151,969 | -34,114,236 | -32,184,848 | -29,302,894 | -20,952,207 |
| Income Tax                  |           |            |            | 0          | 0           | 0           | 0           | 0           | 0           | 0           | 0           |
| Annual Cash Flow            |           |            |            | 4,988,469  | 9,234,282   | 9,234,282   | 9,234,282   | 9,234,282   | 8,699,156   | 9,234,282   | 9,234,282   |
| Discount Factor             | 1.21      | 1.10       | 1.00       | 0.91       | 0.83        | 0.75        | 0.68        | 0.62        | 0.56        | 0.51        | 0.47        |
| Annual Present Value        |           |            |            | 4,534,972  | 7,631,638   | 6,937,853   | 6,307,139   | 5,733,762   | 4,910,447   | 4,738,647   | 4,307,861   |
| TPI + Interest              | 8,165,251 | 40,938,351 | 30,487,303 |            |             |             |             |             |             |             |             |
| NPV                         |           |            | 0          |            |             |             |             |             |             |             |             |

**Table S25. Discounted cashflow sheet of bioelectricity production in USA (continued)**

| Year                        | 9           | 10         | 11         | 12         | 13         | 14         | 15         | 16         | 17         | 18         | 19         |
|-----------------------------|-------------|------------|------------|------------|------------|------------|------------|------------|------------|------------|------------|
| Capital Investment          |             |            |            |            |            |            |            |            |            |            |            |
| Land                        |             |            |            |            |            |            |            |            |            |            |            |
| Working Capital             |             |            |            |            |            |            |            |            |            |            |            |
| Loan Payment                | 9,129,115   | 9,129,115  | 9,129,115  | 9,129,115  | 9,129,115  | 9,129,115  | 9,129,115  | 0          | 0          | 0          | 0          |
| Loan Interest Payment       | 3,443,961   | 3,046,000  | 2,620,182  | 2,164,557  | 1,677,038  | 1,155,392  | 597,232    | 0          | 0          | 0          | 0          |
| Loan Principal              | 43,514,287  | 37,431,172 | 30,922,240 | 23,957,682 | 16,505,605 | 8,531,883  | 0          | 0          | 0          | 0          | 0          |
| Electricity                 | 38,389,903  | 38,389,903 | 38,389,903 | 38,389,903 | 38,389,903 | 38,389,903 | 38,389,903 | 38,389,903 | 38,389,903 | 38,389,903 | 38,389,903 |
| Other sales                 | 2,617,701   | 2,617,701  | 2,617,701  | 2,617,701  | 2,617,701  | 2,617,701  | 2,617,701  | 2,617,701  | 2,617,701  | 2,617,701  | 2,617,701  |
| Total Annual Sales          | 41,007,603  | 41,007,603 | 41,007,603 | 41,007,603 | 41,007,603 | 41,007,603 | 41,007,603 | 41,007,603 | 41,007,603 | 41,007,603 | 41,007,603 |
| Annual Manufacturing Cost   |             |            |            |            |            |            |            |            |            |            |            |
| Raw Material cost           | 14,016,667  | 14,016,667 | 14,016,667 | 14,016,667 | 14,016,667 | 14,016,667 | 14,016,667 | 14,016,667 | 14,016,667 | 14,016,667 | 14,016,667 |
| Utility cost                | 469,252     | 469,252    | 469,252    | 469,252    | 469,252    | 469,252    | 469,252    | 469,252    | 469,252    | 469,252    | 469,252    |
| Baghouse Bags               |             |            | 535,125    |            |            |            |            | 535,125    |            |            |            |
| Fixed Operating Costs       | 8,158,288   | 8,158,288  | 8,158,288  | 8,158,288  | 8,158,288  | 8,158,288  | 8,158,288  | 8,158,288  | 8,158,288  | 8,158,288  | 8,158,288  |
| Total Product Cost          | 22,644,207  | 22,644,207 | 23,179,332 | 22,644,207 | 22,644,207 | 22,644,207 | 22,644,207 | 23,179,332 | 22,644,207 | 22,644,207 | 22,644,207 |
| Annual Depreciation         |             |            |            |            |            |            |            |            |            |            |            |
| <u>General Plant</u>        |             |            |            |            |            |            |            |            |            |            |            |
| Depreciation Charge         |             |            |            |            |            |            |            |            |            |            |            |
| Remaining Value             |             |            |            |            |            |            |            |            |            |            |            |
| <u>Heat and Power Plant</u> | 4.46%       | 4.46%      | 4.46%      | 4.46%      | 4.46%      | 4.46%      | 4.46%      | 4.46%      | 4.46%      | 4.46%      | 4.46%      |
| Depreciation Charge         | 1,166,956   | 1,166,694  | 1,166,956  | 1,166,694  | 1,166,956  | 1,166,694  | 1,166,956  | 1,166,694  | 1,166,956  | 1,166,694  | 1,166,956  |
| Remaining Value             | 13,418,423  | 12,251,729 | 11,084,773 | 9,918,079  | 8,751,123  | 7,584,429  | 6,417,473  | 5,250,778  | 4,083,822  | 2,917,128  | 1,750,172  |
| Net Revenue                 | 13,752,480  | 14,150,702 | 14,041,133 | 15,032,145 | 15,519,403 | 16,041,310 | 16,599,209 | 16,661,577 | 17,196,440 | 17,196,702 | 17,196,440 |
| Losses Forward              | -20,952,207 | -7,199,728 | 0          | 0          | 0          | 0          | 0          | 0          | 0          | 0          | 0          |
| Taxable Income              | -7,199,728  | 6,950,974  | 14,041,133 | 15,032,145 | 15,519,403 | 16,041,310 | 16,599,209 | 16,661,577 | 17,196,440 | 17,196,702 | 17,196,440 |
| Income Tax                  | 0           | 2,432,841  | 4,914,397  | 5,261,251  | 5,431,791  | 5,614,458  | 5,809,723  | 5,831,552  | 6,018,754  | 6,018,846  | 6,018,754  |
| Annual Cash Flow            | 9,234,282   | 6,801,441  | 3,784,760  | 3,973,031  | 3,802,491  | 3,619,823  | 3,424,559  | 11,996,719 | 12,344,642 | 12,344,551 | 12,344,642 |
| Discount Factor             | 0.42        | 0.39       | 0.35       | 0.32       | 0.29       | 0.26       | 0.24       | 0.22       | 0.20       | 0.18       | 0.16       |
| Annual Present Value        | 3,916,237   | 2,622,250  | 1,326,535  | 1,265,930  | 1,101,446  | 953,213    | 819,812    | 2,610,836  | 2,442,322  | 2,220,276  | 2,018,448  |
| TPI + Interest              |             |            |            |            |            |            |            |            |            |            |            |
| NPV                         |             |            |            |            |            |            |            |            |            |            |            |

**Table S25. Discounted cashflow sheet of bioelectricity production in USA (continued)**

| Year                        | 20         | 21         | 22         | 23         | 24         | 25         | 26         | 27         | 28         | 29         | 30         |
|-----------------------------|------------|------------|------------|------------|------------|------------|------------|------------|------------|------------|------------|
| Capital Investment          |            |            |            |            |            |            |            |            |            |            |            |
| Land                        |            |            |            |            |            |            |            |            |            |            | -1,848,000 |
| Working Capital             |            |            |            |            |            |            |            |            |            |            | -6,928,933 |
| Loan Payment                | 0          | 0          | 0          | 0          | 0          | 0          | 0          | 0          | 0          | 0          | 0          |
| Loan Interest Payment       | 0          | 0          | 0          | 0          | 0          | 0          | 0          | 0          | 0          | 0          | 0          |
| Loan Principal              | 0          | 0          | 0          | 0          | 0          | 0          | 0          | 0          | 0          | 0          | 0          |
| Electricity                 | 38,389,903 | 38,389,903 | 38,389,903 | 38,389,903 | 38,389,903 | 38,389,903 | 38,389,903 | 38,389,903 | 38,389,903 | 38,389,903 | 38,389,903 |
| Other sales                 | 2,617,701  | 2,617,701  | 2,617,701  | 2,617,701  | 2,617,701  | 2,617,701  | 2,617,701  | 2,617,701  | 2,617,701  | 2,617,701  | 2,617,701  |
| Total Annual Sales          | 41,007,603 | 41,007,603 | 41,007,603 | 41,007,603 | 41,007,603 | 41,007,603 | 41,007,603 | 41,007,603 | 41,007,603 | 41,007,603 | 41,007,603 |
| Annual Manufacturing Cost   |            |            |            |            |            |            |            |            |            |            |            |
| Raw Material cost           | 14,016,667 | 14,016,667 | 14,016,667 | 14,016,667 | 14,016,667 | 14,016,667 | 14,016,667 | 14,016,667 | 14,016,667 | 14,016,667 | 14,016,667 |
| Utility cost                | 469,252    | 469,252    | 469,252    | 469,252    | 469,252    | 469,252    | 469,252    | 469,252    | 469,252    | 469,252    | 469,252    |
| Baghouse Bags               |            | 535,125    |            |            |            |            | 535,125    |            |            |            |            |
| Fixed Operating Costs       | 8,158,288  | 8,158,288  | 8,158,288  | 8,158,288  | 8,158,288  | 8,158,288  | 8,158,288  | 8,158,288  | 8,158,288  | 8,158,288  | 8,158,288  |
| Total Product Cost          | 22,644,207 | 23,179,332 | 22,644,207 | 22,644,207 | 22,644,207 | 22,644,207 | 23,179,332 | 22,644,207 | 22,644,207 | 22,644,207 | 22,644,207 |
| Annual Depreciation         |            |            |            |            |            |            |            |            |            |            |            |
| <u>General Plant</u>        |            |            |            |            |            |            |            |            |            |            |            |
| Depreciation Charge         |            |            |            |            |            |            |            |            |            |            |            |
| Remaining Value             |            |            |            |            |            |            |            |            |            |            |            |
| <u>Heat and Power Plant</u> | 4.46%      | 2.23%      |            |            |            |            |            |            |            |            |            |
| Depreciation Charge         | 1,166,694  | 583,478    |            |            |            |            |            |            |            |            |            |
| Remaining Value             | 583,478    | 0          |            |            |            |            |            |            |            |            |            |
| Net Revenue                 | 17,196,702 | 17,244,793 | 18,363,396 | 18,363,396 | 18,363,396 | 18,363,396 | 17,828,271 | 18,363,396 | 18,363,396 | 18,363,396 | 18,363,396 |
| Losses Forward              | 0          | 0          | 0          | 0          | 0          | 0          | 0          | 0          | 0          | 0          | 0          |
| Taxable Income              | 17,196,702 | 17,244,793 | 18,363,396 | 18,363,396 | 18,363,396 | 18,363,396 | 17,828,271 | 18,363,396 | 18,363,396 | 18,363,396 | 18,363,396 |
| Income Tax                  | 6,018,846  | 6,035,678  | 6,427,189  | 6,427,189  | 6,427,189  | 6,427,189  | 6,239,895  | 6,427,189  | 6,427,189  | 6,427,189  | 6,427,189  |
| Annual Cash Flow            | 12,344,551 | 11,792,593 | 11,936,208 | 11,936,208 | 11,936,208 | 11,936,208 | 11,588,376 | 11,936,208 | 11,936,208 | 11,936,208 | 11,936,208 |
| Discount Factor             | 0.15       | 0.14       | 0.12       | 0.11       | 0.10       | 0.09       | 0.08       | 0.08       | 0.07       | 0.06       | 0.06       |
| Annual Present Value        | 1,834,939  | 1,593,540  | 1,466,315  | 1,333,014  | 1,211,831  | 1,101,664  | 972,328    | 910,466    | 827,697    | 752,451    | 684,047    |
| TPI + Interest              |            |            |            |            |            |            |            |            |            |            | -502,993   |
| NPV                         |            |            |            |            |            |            |            |            |            |            |            |

**Table S26. Discounted cashflow sheet of bioelectricity production in Brazil**

| Year                        | -2        | -1         | 0          | 1           | 2           | 3           | 4           | 5           | 6           | 7           | 8           |
|-----------------------------|-----------|------------|------------|-------------|-------------|-------------|-------------|-------------|-------------|-------------|-------------|
| Capital Investment          | 4,738,092 | 35,535,690 | 18,952,368 |             |             |             |             |             |             |             |             |
| Land                        | 1,848,000 |            |            |             |             |             |             |             |             |             |             |
| Working Capital             |           |            | 7,403,269  |             |             |             |             |             |             |             |             |
| Loan Payment                |           |            |            | 9,754,069   | 9,754,069   | 9,754,069   | 9,754,069   | 9,754,069   | 9,754,069   | 9,754,069   | 9,754,069   |
| Loan Interest Payment       | 497,500   | 4,228,747  | 6,218,746  | 6,218,746   | 5,971,273   | 5,706,477   | 5,423,146   | 5,119,981   | 4,795,595   | 4,448,502   | 4,077,112   |
| Loan Principal              | 7,107,138 | 60,410,673 | 88,839,225 | 85,303,902  | 81,521,105  | 77,473,513  | 73,142,590  | 68,508,502  | 63,550,028  | 58,244,460  | 52,567,503  |
| Electricity                 |           |            |            | 34,714,870  | 39,674,138  | 39,674,138  | 39,674,138  | 39,674,138  | 39,674,138  | 39,674,138  | 39,674,138  |
| Other sales                 |           |            |            | 2,469,219   | 2,821,964   | 2,821,964   | 2,821,964   | 2,821,964   | 2,821,964   | 2,821,964   | 2,821,964   |
| Total Annual Sales          |           |            |            | 37,184,089  | 42,496,102  | 42,496,102  | 42,496,102  | 42,496,102  | 42,496,102  | 42,496,102  | 42,496,102  |
| Annual Manufacturing Cost   |           |            |            | 13,637,526  |             |             |             |             |             |             |             |
| Raw Material cost           |           |            |            | 13,140,625  | 14,016,667  | 14,016,667  | 14,016,667  | 14,016,667  | 14,016,667  | 14,016,667  | 14,016,667  |
| Utility cost                |           |            |            | 496,901     | 530,028     | 530,028     | 530,028     | 530,028     | 530,028     | 530,028     | 530,028     |
| Baghouse Bags               |           |            |            | 535,125     |             |             |             | 535,125     |             |             |             |
| Fixed Operating Costs       |           |            |            | 7,851,520   | 8,374,955   | 8,374,955   | 8,374,955   | 8,374,955   | 8,374,955   | 8,374,955   | 8,374,955   |
| Total Product Cost          |           |            |            | 22,024,171  | 22,921,649  | 22,921,649  | 22,921,649  | 22,921,649  | 23,456,774  | 22,921,649  | 22,921,649  |
| Annual Depreciation         |           |            |            |             |             |             |             |             |             |             |             |
| <u>General Plant</u>        |           |            |            | 14%         | 24%         | 17%         | 12%         | 9%          | 9%          | 9%          | 4%          |
| Depreciation Charge         |           |            |            | 17,417,410  | 29,849,711  | 21,317,740  | 15,223,475  | 10,884,358  | 10,872,169  | 10,884,358  | 5,436,085   |
| Remaining Value             |           |            |            | 104,467,896 | 74,618,184  | 53,300,444  | 38,076,970  | 27,192,612  | 16,320,442  | 5,436,085   | 0           |
| <u>Heat and Power Plant</u> |           |            |            | 3.75%       | 7.22%       | 6.68%       | 6.18%       | 5.71%       | 5.29%       | 4.89%       | 4.52%       |
| Depreciation Charge         |           |            |            | 981,753     | 1,889,939   | 1,748,043   | 1,617,143   | 1,495,667   | 1,383,617   | 1,279,682   | 1,183,863   |
| Remaining Value             |           |            |            | 25,198,317  | 23,308,378  | 21,560,335  | 19,943,192  | 18,447,524  | 17,063,908  | 15,784,226  | 14,600,363  |
| Net Revenue                 |           |            |            | -9,457,991  | -18,136,471 | -9,197,808  | -2,689,310  | 2,074,447   | 1,987,947   | 2,961,912   | 8,877,393   |
| Losses Forward              |           |            |            |             | -9,457,991  | -27,594,461 | -36,792,269 | -39,481,579 | -37,407,133 | -35,419,186 | -32,457,275 |
| Taxable Income              |           |            |            | -9,457,991  | -27,594,461 | -36,792,269 | -39,481,579 | -37,407,133 | -35,419,186 | -32,457,275 | -23,579,881 |
| Income Tax                  |           |            |            | 0           | 0           | 0           | 0           | 0           | 0           | 0           | 0           |
| Annual Cash Flow            |           |            |            | 5,405,849   | 9,820,384   | 9,820,384   | 9,820,384   | 9,820,384   | 9,285,258   | 9,820,384   | 9,820,384   |
| Discount Factor             | 1.21      | 1.10       | 1.00       | 0.91        | 0.83        | 0.75        | 0.68        | 0.62        | 0.56        | 0.51        | 0.47        |
| Annual Present Value        |           |            |            | 4,914,408   | 8,116,020   | 7,378,200   | 6,707,454   | 6,097,686   | 5,241,286   | 5,039,410   | 4,581,281   |
| TPI + Interest              | 8,571,146 | 43,740,881 | 32,574,383 |             |             |             |             |             |             |             |             |
| NPV                         |           |            | 0          |             |             |             |             |             |             |             |             |



**Table S26. Discounted cashflow sheet of bioelectricity production in Brazil (continued)**

| Year                      | 9           | 10         | 11         | 12         | 13         | 14         | 15         | 16         | 17         | 18         | 19         |
|---------------------------|-------------|------------|------------|------------|------------|------------|------------|------------|------------|------------|------------|
| Capital Investment        |             |            |            |            |            |            |            |            |            |            |            |
| Land                      |             |            |            |            |            |            |            |            |            |            |            |
| Working Capital           |             |            |            |            |            |            |            |            |            |            |            |
| Loan Payment              | 9,754,069   | 9,754,069  | 9,754,069  | 9,754,069  | 9,754,069  | 9,754,069  | 9,754,069  | 0          | 0          | 0          | 0          |
| Loan Interest Payment     | 3,679,725   | 3,254,521  | 2,799,553  | 2,312,737  | 1,791,843  | 1,234,487  | 638,117    | 0          | 0          | 0          | 0          |
| Loan Principal            | 46,493,159  | 39,993,610 | 33,039,094 | 25,597,761 | 17,635,535 | 9,115,953  | 0          | 0          | 0          | 0          | 0          |
| Electricity               | 39,674,138  | 39,674,138 | 39,674,138 | 39,674,138 | 39,674,138 | 39,674,138 | 39,674,138 | 39,674,138 | 39,674,138 | 39,674,138 | 39,674,138 |
| Other sales               | 2,821,964   | 2,821,964  | 2,821,964  | 2,821,964  | 2,821,964  | 2,821,964  | 2,821,964  | 2,821,964  | 2,821,964  | 2,821,964  | 2,821,964  |
| Total Annual Sales        | 42,496,102  | 42,496,102 | 42,496,102 | 42,496,102 | 42,496,102 | 42,496,102 | 42,496,102 | 42,496,102 | 42,496,102 | 42,496,102 | 42,496,102 |
| Annual Manufacturing Cost |             |            |            |            |            |            |            |            |            |            |            |
| Raw Material cost         | 14,016,667  | 14,016,667 | 14,016,667 | 14,016,667 | 14,016,667 | 14,016,667 | 14,016,667 | 14,016,667 | 14,016,667 | 14,016,667 | 14,016,667 |
| Utility cost              | 530,028     | 530,028    | 530,028    | 530,028    | 530,028    | 530,028    | 530,028    | 530,028    | 530,028    | 530,028    | 530,028    |
| Baghouse Bags             |             |            | 535,125    |            |            |            |            | 535,125    |            |            |            |
| Fixed Operating Costs     | 8,374,955   | 8,374,955  | 8,374,955  | 8,374,955  | 8,374,955  | 8,374,955  | 8,374,955  | 8,374,955  | 8,374,955  | 8,374,955  | 8,374,955  |
| Total Product Cost        | 22,921,649  | 22,921,649 | 23,456,774 | 22,921,649 | 22,921,649 | 22,921,649 | 22,921,649 | 23,456,774 | 22,921,649 | 22,921,649 | 22,921,649 |
| Annual Depreciation       |             |            |            |            |            |            |            |            |            |            |            |
| General Plant             |             |            |            |            |            |            |            |            |            |            |            |
| Depreciation Charge       |             |            |            |            |            |            |            |            |            |            |            |
| Remaining Value           |             |            |            |            |            |            |            |            |            |            |            |
| Heat and Power Plant      | 4.46%       | 4.46%      | 4.46%      | 4.46%      | 4.46%      | 4.46%      | 4.46%      | 4.46%      | 4.46%      | 4.46%      | 4.46%      |
| Depreciation Charge       | 1,168,155   | 1,167,893  | 1,168,155  | 1,167,893  | 1,168,155  | 1,167,893  | 1,168,155  | 1,167,893  | 1,168,155  | 1,167,893  | 1,168,155  |
| Remaining Value           | 13,432,208  | 12,264,316 | 11,096,161 | 9,928,268  | 8,760,113  | 7,592,220  | 6,424,066  | 5,256,173  | 4,088,018  | 2,920,125  | 1,751,970  |
| Net Revenue               | 14,726,573  | 15,152,039 | 15,071,620 | 16,093,824 | 16,614,455 | 17,172,073 | 17,768,182 | 17,871,435 | 18,406,298 | 18,406,560 | 18,406,298 |
| Losses Forward            | -23,579,881 | -8,853,308 | 0          | 0          | 0          | 0          | 0          | 0          | 0          | 0          | 0          |
| Taxable Income            | -8,853,308  | 6,298,731  | 15,071,620 | 16,093,824 | 16,614,455 | 17,172,073 | 17,768,182 | 17,871,435 | 18,406,298 | 18,406,560 | 18,406,298 |
| Income Tax                | 0           | 2,204,556  | 5,275,067  | 5,632,838  | 5,815,059  | 6,010,225  | 6,218,864  | 6,255,002  | 6,442,204  | 6,442,296  | 6,442,204  |
| Annual Cash Flow          | 9,820,384   | 7,615,828  | 4,010,191  | 4,187,545  | 4,005,324  | 3,810,158  | 3,601,520  | 12,784,326 | 13,132,249 | 13,132,157 | 13,132,249 |
| Discount Factor           | 0.42        | 0.39       | 0.35       | 0.32       | 0.29       | 0.26       | 0.24       | 0.22       | 0.20       | 0.18       | 0.16       |
| Annual Present Value      | 4,164,801   | 2,936,231  | 1,405,548  | 1,334,281  | 1,160,200  | 1,003,334  | 862,175    | 2,782,242  | 2,598,145  | 2,361,934  | 2,147,228  |
| TPI + Interest            |             |            |            |            |            |            |            |            |            |            |            |
| NPV                       |             |            |            |            |            |            |            |            |            |            |            |

**Table S26. Discounted cashflow sheet of bioelectricity production in Brazil (continued)**

| Year                        | 20         | 21         | 22         | 23         | 24         | 25         | 26         | 27         | 28         | 29         | 30         |
|-----------------------------|------------|------------|------------|------------|------------|------------|------------|------------|------------|------------|------------|
| Capital Investment          |            |            |            |            |            |            |            |            |            |            |            |
| Land                        |            |            |            |            |            |            |            |            |            |            | -1,848,000 |
| Working Capital             |            |            |            |            |            |            |            |            |            |            | -7,403,269 |
| Loan Payment                | 0          | 0          | 0          | 0          | 0          | 0          | 0          | 0          | 0          | 0          | 0          |
| Loan Interest Payment       | 0          | 0          | 0          | 0          | 0          | 0          | 0          | 0          | 0          | 0          | 0          |
| Loan Principal              | 0          | 0          | 0          | 0          | 0          | 0          | 0          | 0          | 0          | 0          | 0          |
| Electricity                 | 39,674,138 | 39,674,138 | 39,674,138 | 39,674,138 | 39,674,138 | 39,674,138 | 39,674,138 | 39,674,138 | 39,674,138 | 39,674,138 | 39,674,138 |
| Other sales                 | 2,821,964  | 2,821,964  | 2,821,964  | 2,821,964  | 2,821,964  | 2,821,964  | 2,821,964  | 2,821,964  | 2,821,964  | 2,821,964  | 2,821,964  |
| Total Annual Sales          | 42,496,102 | 42,496,102 | 42,496,102 | 42,496,102 | 42,496,102 | 42,496,102 | 42,496,102 | 42,496,102 | 42,496,102 | 42,496,102 | 42,496,102 |
| Annual Manufacturing Cost   |            |            |            |            |            |            |            |            |            |            |            |
| Raw Material cost           | 14,016,667 | 14,016,667 | 14,016,667 | 14,016,667 | 14,016,667 | 14,016,667 | 14,016,667 | 14,016,667 | 14,016,667 | 14,016,667 | 14,016,667 |
| Utility cost                | 530,028    | 530,028    | 530,028    | 530,028    | 530,028    | 530,028    | 530,028    | 530,028    | 530,028    | 530,028    | 530,028    |
| Baghouse Bags               |            | 535,125    |            |            |            |            | 535,125    |            |            |            |            |
| Fixed Operating Costs       | 8,374,955  | 8,374,955  | 8,374,955  | 8,374,955  | 8,374,955  | 8,374,955  | 8,374,955  | 8,374,955  | 8,374,955  | 8,374,955  | 8,374,955  |
| Total Product Cost          | 22,921,649 | 23,456,774 | 22,921,649 | 22,921,649 | 22,921,649 | 22,921,649 | 23,456,774 | 22,921,649 | 22,921,649 | 22,921,649 | 22,921,649 |
| Annual Depreciation         |            |            |            |            |            |            |            |            |            |            |            |
| <u>General Plant</u>        |            |            |            |            |            |            |            |            |            |            |            |
| Depreciation Charge         |            |            |            |            |            |            |            |            |            |            |            |
| Remaining Value             |            |            |            |            |            |            |            |            |            |            |            |
| <u>Heat and Power Plant</u> | 4.46%      | 2.23%      |            |            |            |            |            |            |            |            |            |
| Depreciation Charge         | 1,167,893  | 584,077    |            |            |            |            |            |            |            |            |            |
| Remaining Value             | 584,077    | 0          |            |            |            |            |            |            |            |            |            |
| Net Revenue                 | 18,406,560 | 18,455,250 | 19,574,453 | 19,574,453 | 19,574,453 | 19,574,453 | 19,039,328 | 19,574,453 | 19,574,453 | 19,574,453 | 19,574,453 |
| Losses Forward              | 0          | 0          | 0          | 0          | 0          | 0          | 0          | 0          | 0          | 0          | 0          |
| Taxable Income              | 18,406,560 | 18,455,250 | 19,574,453 | 19,574,453 | 19,574,453 | 19,574,453 | 19,039,328 | 19,574,453 | 19,574,453 | 19,574,453 | 19,574,453 |
| Income Tax                  | 6,442,296  | 6,459,338  | 6,851,059  | 6,851,059  | 6,851,059  | 6,851,059  | 6,663,765  | 6,851,059  | 6,851,059  | 6,851,059  | 6,851,059  |
| Annual Cash Flow            | 13,132,157 | 12,579,990 | 12,723,395 | 12,723,395 | 12,723,395 | 12,723,395 | 12,375,563 | 12,723,395 | 12,723,395 | 12,723,395 | 12,723,395 |
| Discount Factor             | 0.15       | 0.14       | 0.12       | 0.11       | 0.10       | 0.09       | 0.08       | 0.08       | 0.07       | 0.06       | 0.06       |
| Annual Present Value        | 1,952,011  | 1,699,941  | 1,563,018  | 1,420,925  | 1,291,750  | 1,174,318  | 1,038,377  | 970,511    | 882,283    | 802,075    | 729,159    |
| TPI + Interest              |            |            |            |            |            |            |            |            |            |            | -530,177   |
| NPV                         |            |            |            |            |            |            |            |            |            |            |            |

**Table S27. Economic assumptions and parameters for economic analysis**

| <b>Economic assumptions <sup>a</sup></b> |       | Unit     |
|------------------------------------------|-------|----------|
| Cost year basis                          | 2018  | USD      |
| Annual operating time                    | 8,410 | h        |
| Equipment lifespan                       | 30    | y        |
| Construction time                        | 3     | y        |
| Loan terms                               | 15    | y        |
| Depreciation period                      | 7     | y        |
| Working capital                          | 5.0   | %*       |
| Equity                                   | 40.0  | %*       |
| Loan interest                            | 7.0   | %        |
| Nominal discount rate                    | 10.0  | %        |
| Tax rate                                 | 35.0  | %        |
| <b>Economic parameters</b>               |       |          |
| Tipping fee <sup>a</sup>                 | 20.0  | US\$/t   |
| Digest price <sup>b</sup>                | 7.1   | US\$/t   |
| Electricity price <sup>c</sup>           | 69.3  | US\$/MWh |
| Low pressure steam price <sup>d</sup>    | 13.9  | US\$/MWh |
| Cooling water price <sup>d</sup>         | 2.2   | US\$/MWh |

<sup>a</sup> Taken from NREL report.<sup>16</sup>  
<sup>b</sup> Taken from system-level study.<sup>17</sup>  
<sup>c</sup> Taken from U.S. EIA data.<sup>18</sup>  
<sup>d</sup> Taken from system-level study.<sup>19</sup>  
\* Percent of total capital investment

**Table S28. Economics of GV operations using green energy**

|               |                | Unit: \$/mile |       |      |        |
|---------------|----------------|---------------|-------|------|--------|
|               | Types          | China         | India | USA  | Brazil |
| Well-to-pump  | Biomethane     | 0.63          | 0.52  | 0.50 | 0.52   |
|               | Bioethanol     | 0.60          | 0.60  | 0.60 | 0.60   |
|               | Biohydrogen    | 0.25          | 0.24  | 0.24 | 0.24   |
|               | Bioelectricity | 0.97          | 0.79  | 0.81 | 1.04   |
| Pump-to-wheel | Biomethane     | 0.15          | 0.15  | 0.15 | 0.15   |
|               | Bioethanol     | 0.15          | 0.15  | 0.15 | 0.15   |
|               | Biohydrogen    | 0.24          | 0.24  | 0.24 | 0.24   |
|               | Bioelectricity | 0.32          | 0.32  | 0.32 | 0.32   |
| Total         | Biomethane     | 0.78          | 0.67  | 0.65 | 0.66   |
|               | Bioethanol     | 0.74          | 0.74  | 0.75 | 0.75   |
|               | Biohydrogen    | 0.49          | 0.48  | 0.48 | 0.48   |
|               | Bioelectricity | 1.29          | 1.12  | 1.14 | 1.36   |

## S.5 Environmental analysis

**Table S29. Environmental impacts of GV operations using green energy**

| Impact categories                     | Types         | China          | India  | USA    | Brazil |        |
|---------------------------------------|---------------|----------------|--------|--------|--------|--------|
| GWP<br>(kg CO <sub>2</sub> /t of FW)  | Well-to-pump  | Biomethane     | 24.11  | 31.02  | 33.65  | 33.70  |
|                                       |               | Bioethanol     | 19.13  | 20.02  | 20.05  | 20.01  |
|                                       |               | Biohydrogen    | 24.05  | 26.16  | 27.75  | 27.58  |
|                                       |               | Bioelectricity | 1.90   | 2.48   | 2.50   | 2.02   |
|                                       | Pump-to-wheel | Biomethane     | 100.62 | 133.08 | 118.77 | 110.51 |
|                                       |               | Bioethanol     | 334.17 | 344.28 | 318.15 | 301.13 |
|                                       |               | Biohydrogen    | 128.95 | 144.54 | 151.01 | 147.21 |
|                                       |               | Bioelectricity | 74.19  | 89.41  | 93.78  | 98.77  |
| FD<br>(kg oil/t of FW)                | Well-to-pump  | Biomethane     | 0.95   | 1.23   | 1.33   | 1.33   |
|                                       |               | Bioethanol     | 1.92   | 2.01   | 2.01   | 2.01   |
|                                       |               | Biohydrogen    | 7.42   | 8.08   | 8.57   | 8.52   |
|                                       |               | Bioelectricity | 0.54   | 0.70   | 0.71   | 0.57   |
|                                       | Pump-to-wheel | Biomethane     | 6.57   | 13.56  | 8.38   | 4.93   |
|                                       |               | Bioethanol     | 72.43  | 70.83  | 57.41  | 50.69  |
|                                       |               | Biohydrogen    | 8.21   | 10.64  | 10.37  | 9.39   |
|                                       |               | Bioelectricity | 2.39   | 3.06   | 3.39   | 3.60   |
| PM<br>(kg PM <sub>2.5</sub> /t of FW) | Well-to-pump  | Biomethane     | 0.01   | 0.01   | 0.01   | 0.01   |
|                                       |               | Bioethanol     | 0.01   | 0.01   | 0.01   | 0.01   |
|                                       |               | Biohydrogen    | 0.04   | 0.05   | 0.05   | 0.05   |
|                                       |               | Bioelectricity | 0.00   | 0.00   | 0.00   | 0.00   |
|                                       | Pump-to-wheel | Biomethane     | 0.05   | 0.12   | 0.09   | 0.02   |
|                                       |               | Bioethanol     | 0.09   | 0.15   | 0.13   | 0.06   |
|                                       |               | Biohydrogen    | 0.05   | 0.07   | 0.07   | 0.05   |
|                                       |               | Bioelectricity | 0.00   | 0.00   | 0.00   | 0.00   |
| TA<br>(kg SO <sub>2</sub> /t of FW)   | Well-to-pump  | Biomethane     | 0.02   | 0.02   | 0.02   | 0.02   |
|                                       |               | Bioethanol     | 0.03   | 0.03   | 0.03   | 0.03   |
|                                       |               | Biohydrogen    | 0.17   | 0.19   | 0.20   | 0.20   |
|                                       |               | Bioelectricity | 0.01   | 0.01   | 0.01   | 0.01   |
|                                       | Pump-to-wheel | Biomethane     | 0.11   | 0.16   | 0.08   | 0.06   |
|                                       |               | Bioethanol     | 0.25   | 0.28   | 0.19   | 0.16   |
|                                       |               | Biohydrogen    | 0.19   | 0.22   | 0.22   | 0.21   |
|                                       |               | Bioelectricity | 0.01   | 0.01   | 0.02   | 0.01   |

**Table S30. GHG emission of GV operations using green energy**

|               |                | Unit: kg CO <sub>2</sub> /mile |       |       |        |
|---------------|----------------|--------------------------------|-------|-------|--------|
| Types         |                | China                          | India | USA   | Brazil |
| Well-to-pump  | Biomethane     | 0.994                          | 1.031 | 0.792 | 0.714  |
|               | Bioethanol     | 1.810                          | 1.780 | 1.633 | 1.544  |
|               | Biohydrogen    | 0.476                          | 0.494 | 0.485 | 0.474  |
|               | Bioelectricity | 1.410                          | 1.299 | 1.355 | 1.776  |
| Pump-to-wheel | Biomethane     | 0.313                          | 0.313 | 0.313 | 0.313  |
|               | Bioethanol     | 0.110                          | 0.110 | 0.110 | 0.110  |
|               | Biohydrogen    | 0.109                          | 0.109 | 0.109 | 0.109  |
|               | Bioelectricity | 0.037                          | 0.037 | 0.037 | 0.037  |
| Well-to-wheel | Biomethane     | 1.307                          | 1.344 | 1.105 | 1.027  |
|               | Bioethanol     | 1.920                          | 1.890 | 1.743 | 1.654  |
|               | Biohydrogen    | 0.586                          | 0.603 | 0.594 | 0.583  |
|               | Bioelectricity | 1.447                          | 1.336 | 1.392 | 1.813  |

## Reference

1. S. GOTA, C. HUIZENGA and K. PEET, *SLOCAT. Beijing: SLOCAT*, 2015.
2. *SuperPro Designer v10*, Inteligen, Inc., 2019.
3. I. Angelidaki, L. Ellegaard and B. K. Ahring, *Biotechnology and bioengineering*, 1993, **42**, 159-166.
4. I. Angelidaki, L. Ellegaard and B. K. Ahring, *Biotechnology and bioengineering*, 1999, **63**, 363-372.
5. N. Azbar and D. B. Levin, *State of the art and progress in production of biohydrogen*, Bentham Science Publishers, 2012.
6. C. A. Grande and A. E. Rodrigues, *Industrial & engineering chemistry research*, 2007, **46**, 4595-4605.
7. S.-I. Yang, D.-Y. Choi, S.-C. Jang, S.-H. Kim and D.-K. Choi, *Adsorption*, 2008, **14**, 583-590.
8. W.-G. Kim, J. Yang, S. Han, C. Cho, C.-H. Lee and H. Lee, *Korean Journal of Chemical Engineering*, 1995, **12**, 503.
9. D.-G. Choe, D.-Y. Choe, S.-H. Kim, U.-S. An and S.-C. Jang, *Korean Chemical Engineering Research*, 2006, **44**.
10. L. Wang, Y. Cheng, X. Xiao and X. Li, *Journal of Chemical & Engineering Data*, 2007, **52**, 1255-1257.
11. *ASPEN Plus Process Simulator V10*, Aspen Technology, Inc., 2017.
12. E. E. Kwon, J.-M. Jung, H. J. Kim and J. Lee, *Environmental Research*, 2020, DOI: 10.1016/j.envres.2020.109199.
13. S. Wang, W. Guo, H. Wang, L. Zhu, S. Yin and K. Qiu, *New Journal of Chemistry*, 2014, **38**, 2792-2800.
14. M. Mozdierz, G. Brus, A. Sciazko, Y. Komatsu, S. Kimijima and J. Szmyd, *Flow, Turbulence and Combustion*, 2016, **97**, 171-189.
15. I. Govender, G. A. Thopil and R. Inglesi-Lotz, *Journal of Cleaner Production*, 2019, **214**, 154-165.
16. K. Moriarty, *Feasibility Study of Anaerobic Digestion of Food Waste in St. Bernard, Louisiana. A Study Prepared in Partnership with the Environmental Protection Agency for the RE-Powering America's Land Initiative: Siting Renewable Energy on Potentially Contaminated Land and Mine Sites*, National Renewable Energy Lab.(NREL), Golden, CO (United States), 2013.
17. J.-R. Bastidas-Oyanedel and J. E. Schmidt, *Energies*, 2018, **11**, 1551.
18. Average Price of Electricity to Ultimate Customers, [https://www.eia.gov/electricity/monthly/epm\\_table\\_grapher.php?t=epmt\\_5\\_03](https://www.eia.gov/electricity/monthly/epm_table_grapher.php?t=epmt_5_03), (accessed November 5, 2018).
19. J. Byun and J. Han, *Green Chemistry*, 2017, **19**, 5214-5229.
